# Supplementary material for: Computational study of the working mechanism and rate acceleration of overcrowded alkene-based light-driven rotary molecular motors
Source: Royal Society of Chemistry journal article supplement (doi:10.1039/c3ra46880a), 2014-01-01
Supplement: c3ra46880a.pdf [file c3ra46880a.pdf]

## Electronic Supplementary Information

# Computational study of the working mechanism and rate acceleration of overcrowded alkene-based light-driven rotary molecular motors

Changfeng Fang, Baswanth Oruganti and Bo Durbbej\*

*Division of Computational Physics, IFM, Linköping University, SE-581 83 Linköping, Sweden*

*E-mail: bodur@ifm.liu.se*

### Table of Contents

|     |                                                         |               |
|-----|---------------------------------------------------------|---------------|
| 1.  | Table S1                                                | page S1       |
| 2.  | Table S2                                                | page S1       |
| 3.  | Table S3                                                | page S3       |
| 4.  | Table S4                                                | page S4       |
| 5.  | Table S5                                                | page S5       |
| 6.  | Table S6                                                | page S6       |
| 7.  | Fig. S1                                                 | page S7       |
| 8.  | Fig. S2                                                 | page S8       |
| 9.  | References for this document                            | page S9       |
| 10. | Cartesian coordinates for stationary points in Table S4 | pages S10–S81 |

**Table S1**  $\omega$ B97X-D and B3LYP relative gas-phase free energies (in kJ mol<sup>-1</sup>) of stationary points of motor **1** with different basis sets

| Stationary point                | $\omega$ B97X-D  |                   |                      |                           | B3LYP            |                   |                      |                           |
|---------------------------------|------------------|-------------------|----------------------|---------------------------|------------------|-------------------|----------------------|---------------------------|
|                                 | SVP <sup>a</sup> | TZVP <sup>b</sup> | cc-pVDZ <sup>c</sup> | 6-31++G(d,p) <sup>d</sup> | SVP <sup>a</sup> | TZVP <sup>b</sup> | cc-pVDZ <sup>c</sup> | 6-31++G(d,p) <sup>d</sup> |
| ( <i>P,P</i> )- <i>trans</i> -1 | 3.9              | 3.1               | 3.4                  | 3.4                       | 0.0              | 0.0               | 0.0                  | 0.0                       |
| ( <i>M,M</i> )- <i>cis</i> -2   | 54.6             | 59.5              | 56.7                 | 55.6                      | 62.0             | 66.7              | 63.5                 | 63.3                      |
| TS <sub>2</sub>                 | 155.9            | 156.2             | 156.0                | 156.0                     | 145.6            | 149.2             | 145.8                | 147.3                     |
| ( <i>M,P</i> )- <i>cis</i> -2   | 68.3             | 67.5              | 65.8                 | 68.1                      | 67.7             | 67.3              | 66.7                 | 66.5                      |
| TS <sub>3</sub>                 | 151.0            | 151.4             | 150.9                | 150.2                     | 143.2            | 146.7             | 143.5                | 143.9                     |
| ( <i>P,P</i> )- <i>cis</i> -2   | 0.0              | 0.0               | 0.0                  | 0.0                       | 10.6             | 5.2               | 3.8                  | 4.0                       |
| ( <i>M,M</i> )- <i>trans</i> -1 | 49.4             | 46.7              | 47.4                 | 46.0                      | 47.4             | 51.0              | 47.5                 | 47.8                      |
| TS <sub>5</sub>                 | 173.7            | 167.4             | 166.5                | 172.4                     | 165.6            | 168.8             | 153.0                | 154.4                     |
| ( <i>M,P</i> )- <i>trans</i> -1 | 29.6             | 27.2              | 28.1                 | 29.2                      | 31.2             | 32.7              | 31.1                 | 32.0                      |
| TS <sub>6</sub>                 | 165.4            | 165.7             | 164.3                | 164.0                     | 157.1            | 160.4             | 156.6                | 158.4                     |

<sup>a</sup> SVP is the Karlsruhe double- $\zeta$  split valence plus polarization basis set. <sup>b</sup> TZVP is the Karlsruhe triple- $\zeta$  split valence plus polarization basis set. <sup>c</sup> cc-pVDZ is the Dunning-type correlation-consistent polarized valence double- $\zeta$  basis set. <sup>d</sup> 6-31++G(d,p) is the Pople-style 6-31G(d,p) double- $\zeta$  basis set augmented with one set of polarization functions and one set of diffuse functions for both heavy atoms and hydrogens.

**Table S2** Relative gas-phase free energies (in kJ mol<sup>-1</sup>) of stationary points of motor **1** with different density functionals<sup>a</sup>

| Stationary point                | BP86  | BLYP  | B3LYP | PBE0  | M06   | M06-2X | BMK   | $\omega$ B97X | $\omega$ B97X-D | B2PLYP | B2PLYP-D |
|---------------------------------|-------|-------|-------|-------|-------|--------|-------|---------------|-----------------|--------|----------|
| ( <i>P,P</i> )- <i>trans</i> -1 | 0.0   | 0.0   | 0.0   | 0.0   | 3.4   | 7.2    | 0.0   | 0.5           | 3.9             | 3.4    | 13.3     |
| ( <i>M,M</i> )- <i>cis</i> -2   | 51.3  | 57.0  | 62.0  | 58.5  | 47.5  | 50.0   | 58.4  | 58.9          | 54.6            | 54.0   | 46.0     |
| TS <sub>2</sub>                 | 133.4 | 137.9 | 145.6 | 143.9 | 149.6 | 155.2  | 154.7 | 152.1         | 155.9           | 146.7  | 155.0    |
| ( <i>M,P</i> )- <i>cis</i> -2   | 66.4  | 65.2  | 67.7  | 70.2  | 69.0  | 73.4   | 70.1  | 65.8          | 68.3            | 67.7   | 75.6     |
| TS <sub>3</sub>                 | 130.0 | 134.8 | 143.2 | 141.9 | 138.1 | 146.7  | 142.8 | 149.6         | 151.0           | 144.8  | 151.4    |
| ( <i>P,P</i> )- <i>cis</i> -2   | 2.1   | 3.0   | 10.6  | 3.2   | 0.0   | 0.0    | 7.9   | 0.0           | 0.0             | 0.0    | 0.0      |
| ( <i>M,M</i> )- <i>trans</i> -1 | 35.6  | 42.5  | 47.4  | 43.7  | 39.9  | 43.1   | 47.9  | 46.3          | 49.4            | 43.4   | 44.0     |
| TS <sub>5</sub>                 | 136.9 | 142.5 | 165.6 | 152.6 | 152.7 | 160.7  | 156.8 | 166.7         | 173.7           | 166.4  | 169.1    |
| ( <i>M,P</i> )- <i>trans</i> -1 | 29.8  | 30.7  | 31.2  | 30.9  | 31.1  | 29.8   | 30.6  | 27.3          | 29.6            | 31.1   | 36.0     |
| TS <sub>6</sub>                 | 143.7 | 147.6 | 157.1 | 156.6 | 152.8 | 162.2  | 165.6 | 162.9         | 165.4           | 156.4  | 162.4    |

<sup>a</sup> All calculations carried out with the SVP basis set.

## Comments on Tables S1 and S2

Based on the observation that the two principal methods of this work,  $\omega$ B97X-D and B3LYP, give opposing free energies for (*P,P*)-*trans*-1 and (*P,P*)-*cis*-2 at the SVP basis-set level, Tables S1 and S2 present key results from an investigation aimed at exploring how sensitive calculated free energies of the ground-state stationary points of motor **1** are to the choice of density functional and basis set. Table S1 focuses on basis-set effects and Table S2 on differences between different functionals. Included in the investigation are, in addition to  $\omega$ B97X-D and B3LYP, also the BP86, BLYP, PBE0, M06-2X and  $\omega$ B97X functionals used elsewhere in the manuscript, as well as M06,<sup>1</sup> BMK,<sup>2</sup> B2PLYP<sup>3</sup> and B2PLYP-D.<sup>4</sup> Of the latter, M06 and BMK are global hybrid meta-GGAs, whereas B2PLYP and B2PLYP-D are so-called double hybrids that contain both exact exchange and an explicit second-order correlation term obtained from Kohn-Sham orbitals and eigenvalues. In analogy with the relationship between  $\omega$ B97X and  $\omega$ B97X-D, B2PLYP-D adds empirical dispersion corrections<sup>5,6</sup> to B2PLYP.<sup>4</sup>

From Table S1, it is observed that all four basis sets considered – SVP and the larger TZVP, cc-pVDZ and 6-31++G(d,p) – consistently give very similar results for all ten stationary points along the rotary cycle. Indeed, the differences in calculated relative free energies between the basis sets are only of the order of a few kJ mol<sup>-1</sup>. Thus, the opposing predictions by  $\omega$ B97X-D and B3LYP as to whether (*P,P*)-*trans*-1 or (*P,P*)-*cis*-2 is the most stable isomer

persist at all basis-set levels.

From Table S2, in turn, it can be inferred that the calculated free energies are not very sensitive to the choice of density functional either, especially considering the number of functionals tested (11) and their different construction. Specifically, for the ten stationary points, the range over which the free-energy estimates vary between the methods is on average  $\sim 18 \text{ kJ mol}^{-1}$ , and a mere  $\sim 6 \text{ kJ mol}^{-1}$  if only the  $\omega\text{B97X-D}$  and B3LYP results are considered. As for the relative free energies of *(P,P)-trans-1* and *(P,P)-cis-2*,  $\omega\text{B97X-D}$  is joined by M06, M06-2X,  $\omega\text{B97X}$ , B2PLYP and B2PLYP-D in predicting that *(P,P)-cis-2* is more stable, and B3LYP is joined by BP86, BLYP, PBE0 and BMK in predicting that *(P,P)-trans-1* is more stable.

**Table S3** Vertical (VEE) and adiabatic (AEE)  $S_0 \rightarrow S_1$  excitation energies (in eV) of the (*P,P*)-*trans*-1 and (*P,P*)-*cis*-2 isomers of motor **1** in the gas phase at different levels of theory

| Level of theory <sup>a</sup> | <i>(P,P)</i> - <i>trans</i> -1 |                | <i>(P,P)</i> - <i>cis</i> -2 |                |
|------------------------------|--------------------------------|----------------|------------------------------|----------------|
|                              | VEE                            | AEE            | VEE                          | AEE            |
| $\omega$ B97X-D/SVP          | 4.33                           | 3.26           | 4.08                         | 3.33           |
| $\omega$ B97X-D/TZVP         | 4.34                           | 3.31           | 4.15                         | 3.39           |
| $\omega$ B97X-D/cc-pVDZ      | 4.32                           | 3.30           | 4.08                         | 3.33           |
| $\omega$ B97X-D/6-31++G(d,p) | 4.29                           | 3.28           | 4.10                         | 3.35           |
| CC2/SVP                      | 4.24                           | – <sup>c</sup> | 3.70                         | – <sup>c</sup> |
| CC2/TZVP                     | 4.15 <sup>b</sup>              | – <sup>c</sup> | 3.59 <sup>b</sup>            | – <sup>c</sup> |
| CC2/cc-pVDZ                  | 4.17                           | – <sup>c</sup> | 3.66                         | – <sup>c</sup> |

<sup>a</sup> CC2 calculations carried out with the Turbomole 6.3 suite of programs.<sup>7,8</sup> <sup>b</sup> Calculation based on CC2/SVP  $S_0$  geometry. <sup>c</sup> Calculation not performed.

**Table S4**  $\omega$ B97X-D and B3LYP relative free energies (in  $\text{kJ mol}^{-1}$ ) of stationary points of motor **1** in the gas phase and in solution<sup>a</sup>

| Stationary point <sup>b</sup> | $\omega$ B97X-D |        |          | B3LYP     |        |          |
|-------------------------------|-----------------|--------|----------|-----------|--------|----------|
|                               | Gas phase       | Hexane | Methanol | Gas phase | Hexane | Methanol |
| <i>(P,P)</i> -trans-1         | 3.9             | 9.5    | 16.8     | 0.0       | 0.0    | 3.6      |
| <i>(M,M)</i> -cis-2           | 54.6            | 56.6   | 54.4     | 62.0      | 58.4   | 55.3     |
| TS <sub>2</sub>               | 155.9           | 151.5  | 156.3    | 145.6     | 137.0  | 139.0    |
| <i>(M,P)</i> -cis-2           | 68.3            | 72.8   | 73.7     | 67.7      | 66.0   | 64.4     |
| TS <sub>3</sub>               | 151.0           | 148.0  | 152.1    | 143.2     | 136.1  | 137.1    |
| <i>(P,P)</i> -cis-2           | 0.0             | 0.0    | 0.0      | 10.6      | 3.2    | 0.0      |
| <i>(M,M)</i> -trans-1         | 49.4            | 51.4   | 58.5     | 47.4      | 44.5   | 47.9     |
| TS <sub>5</sub>               | 173.7           | 168.9  | 175.2    | 165.6     | 156.2  | 158.7    |
| <i>(M,P)</i> -trans-1         | 29.6            | 29.7   | 36.3     | 31.2      | 26.1   | 28.7     |
| TS <sub>6</sub>               | 165.4           | 160.7  | 167.5    | 157.1     | 147.6  | 150.5    |

<sup>a</sup> All calculations carried out with the SVP basis set. <sup>b</sup> Cartesian coordinates of all stationary points are included in part 10 of this document.

**Table S5**  $\omega$ B97X-D and B3LYP relative free energies (in  $\text{kJ mol}^{-1}$ ) of stationary points of the *i*-propyl-substituted motor in the gas phase and in solution<sup>a</sup>

| Stationary point <sup>b</sup>                                     | $\omega$ B97X-D |        |          | B3LYP     |        |          | Exp. <sup>c</sup> |
|-------------------------------------------------------------------|-----------------|--------|----------|-----------|--------|----------|-------------------|
|                                                                   | Gas phase       | Hexane | Methanol | Gas phase | Hexane | Methanol |                   |
| ( <i>P,P</i> )- <i>trans</i> -1                                   | 13.0            | 21.0   | 29.0     | 11.0      | 12.3   | 16.8     |                   |
| ( <i>M,M</i> )- <i>cis</i> -2                                     | 94.3            | 88.4   | 86.3     | 101.9     | 97.2   | 95.4     |                   |
| TS <sub>2</sub>                                                   | 160.7           | 159.4  | 164.0    | 161.9     | 155.0  | 155.9    |                   |
| ( <i>M,P</i> )- <i>cis</i> -2                                     | 69.0            | 75.0   | 77.1     | 67.7      | 68.7   | 68.8     |                   |
| TS <sub>3</sub>                                                   | 171.9           | 170.3  | 175.3    | 162.7     | 159.6  | 161.6    |                   |
| ( <i>P,P</i> )- <i>cis</i> -2                                     | 0.0             | 0.0    | 0.0      | 0.0       | 0.0    | 0.0      |                   |
| ( <i>M,M</i> )- <i>trans</i> -1                                   | 106.5           | 107.8  | 114.9    | 106.3     | 103.0  | 107.1    |                   |
| TS <sub>5</sub>                                                   | 214.7           | 214.2  | 222.0    | 205.7     | 199.2  | 203.8    |                   |
| ( <i>M,P</i> )- <i>trans</i> -1                                   | 21.2            | 27.0   | 34.0     | 24.0      | 24.2   | 27.9     |                   |
| TS <sub>6</sub>                                                   | 181.4           | 178.3  | 185.5    | 172.1     | 168.0  | 171.8    |                   |
| <u>Helix inversion barriers</u>                                   |                 |        |          |           |        |          |                   |
| ( <i>M,M</i> )- <i>cis</i> -2 → ( <i>M,P</i> )- <i>cis</i> -2     | 66.4            | 71.0   | 77.7     | 60.0      | 57.8   | 60.5     | – <sup>d</sup>    |
| ( <i>M,P</i> )- <i>cis</i> -2 → ( <i>P,P</i> )- <i>cis</i> -2     | 102.9           | 95.3   | 98.2     | 95.1      | 90.9   | 92.8     | – <sup>d</sup>    |
| ( <i>M,M</i> )- <i>trans</i> -1 → ( <i>M,P</i> )- <i>trans</i> -1 | 108.2           | 106.4  | 107.1    | 99.4      | 96.2   | 96.7     | 124               |
| ( <i>M,P</i> )- <i>trans</i> -1 → ( <i>P,P</i> )- <i>trans</i> -1 | 160.2           | 151.3  | 151.5    | 148.1     | 143.8  | 143.9    | 131               |

<sup>a</sup> All calculations carried out with the SVP basis set. <sup>b</sup> Stationary points are identified in the same way as for motor **1**.

<sup>c</sup> Experimental free-energy barriers from Ref. 20 of the main text. <sup>d</sup> Not available.

**Table S6** Rate-determining  $\omega$ B97X-D and B3LYP gas-phase free-energy barriers (in  $\text{kJ mol}^{-1}$ ) for the thermal helix inversion steps of motors **2** and **3** with different basis sets

| Motor    | Half cycle                            | $\omega$ B97X-D |      |         |              | B3LYP |      |         |              |
|----------|---------------------------------------|-----------------|------|---------|--------------|-------|------|---------|--------------|
|          |                                       | SVP             | TZVP | cc-pVDZ | 6-31++G(d,p) | SVP   | TZVP | cc-pVDZ | 6-31++G(d,p) |
| <b>2</b> | <i>trans</i> $\rightarrow$ <i>cis</i> | 41.4            | 47.4 | 45.0    | 47.3         | 34.8  | 40.7 | 36.8    | 38.0         |
|          | <i>cis</i> $\rightarrow$ <i>trans</i> | 40.0            | 45.4 | 41.6    | 44.3         | 35.2  | 40.6 | 37.4    | 39.1         |
| <b>3</b> | <i>trans</i> $\rightarrow$ <i>cis</i> | 23.9            | 33.4 | 26.6    | 33.2         | 19.7  | 27.1 | 21.8    | 25.0         |
|          | <i>cis</i> $\rightarrow$ <i>trans</i> | 22.9            | 31.9 | 24.4    | 29.3         | 17.4  | 25.9 | 19.2    | 23.8         |

**Fig. S1** Two-dimensional  $\omega$ B97X-D/SVP (upper panels) and B3LYP/SVP (lower panels)  $S_0$  PESs (in  $\text{kJ mol}^{-1}$ ) of motor **1** in the gas phase describing torsional motion along the  $\beta$  and  $\beta'$  coordinates. These PESs encompass both stepwise and concerted mechanisms for the  $(M,M)\text{-cis-2} \rightarrow (P,P)\text{-cis-2}$  and  $(M,M)\text{-trans-1} \rightarrow (P,P)\text{-trans-1}$  thermal helix inversion steps, and were obtained by performing a series of constrained geometry optimizations, where for each optimization all other geometric parameters than the  $\beta$  and  $\beta'$  dihedral angles were relaxed. The approximate positions of the relevant stationary points are also indicated in the plots.

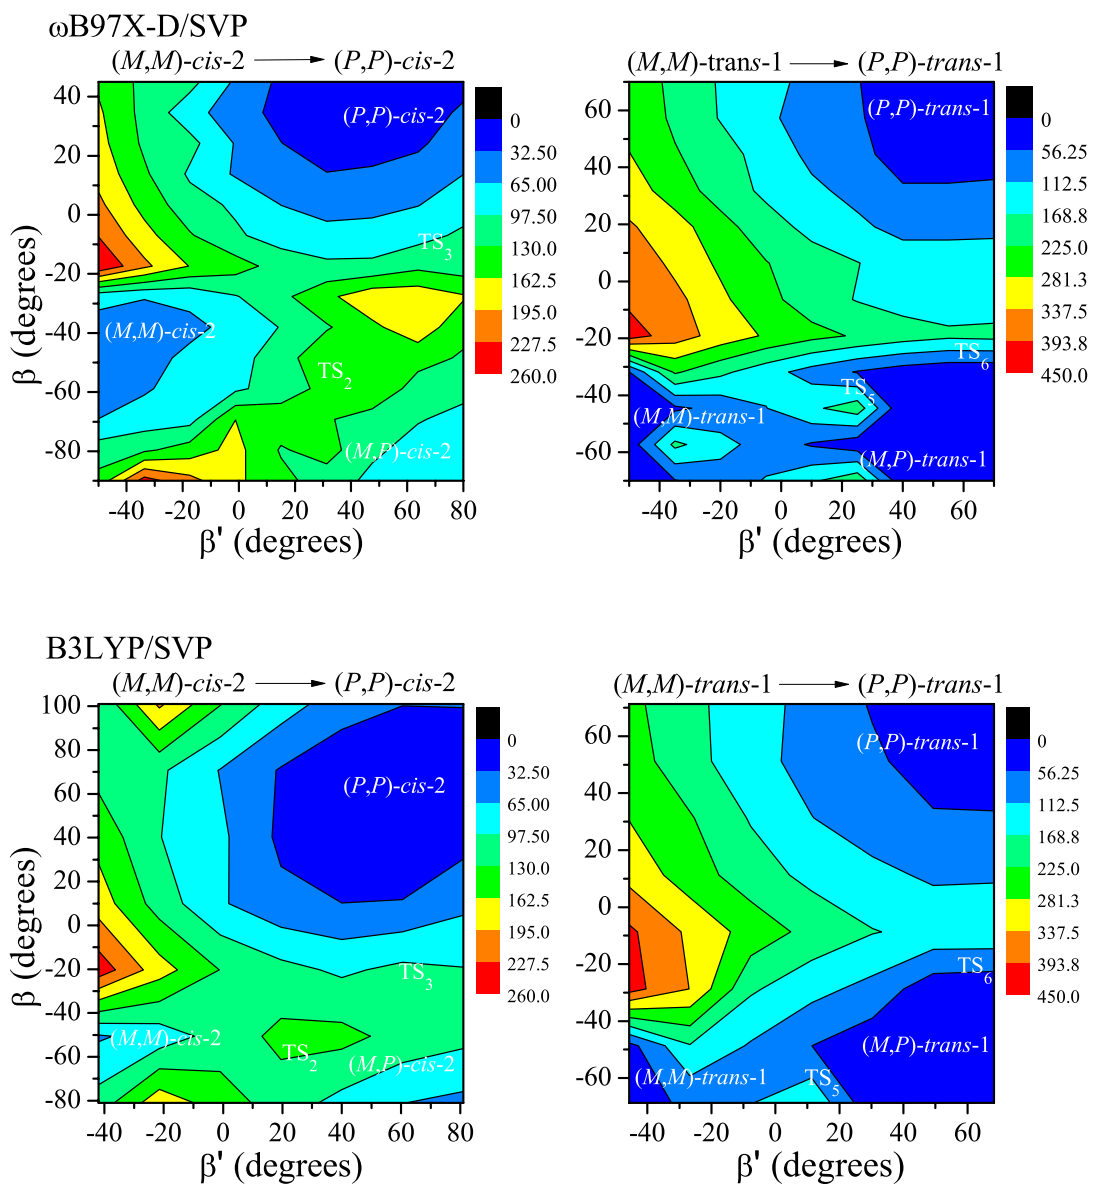



**Fig. S2** FC relaxation along the C2–C1–C4–C6 coordinate of the *trans* and *cis* isomers of motors **2** and **3** calculated at the  $\omega$ B97X-D/SVP gas-phase level. These data indicate that the associated photoisomerizations occur in a unidirectional fashion.

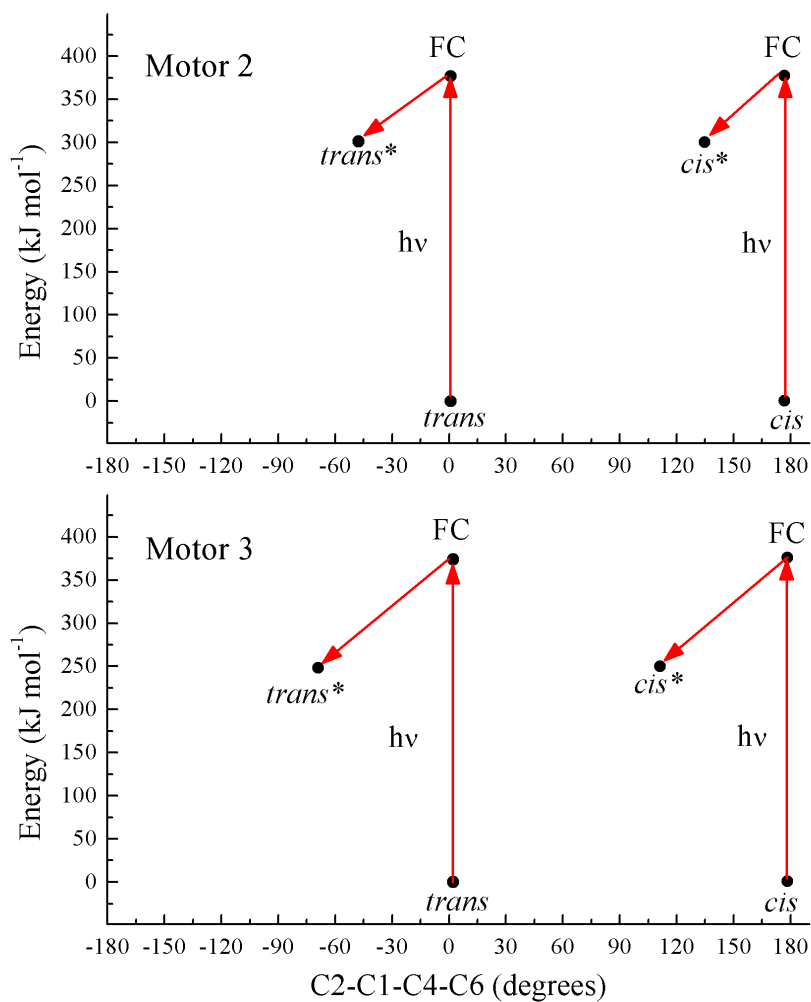

### References for this document

1. Y. Zhao and D. G. Truhlar, *Theor. Chem. Acc.*, 2008, **120**, 215-241.
2. A. D. Boese and J. M. L. Martin, *J. Chem. Phys.*, 2004, **121**, 3405-3416.
3. S. Grimme, *J. Chem. Phys.*, 2006, **124**, 034108.
4. T. Schwabe and S. Grimme, *Phys. Chem. Chem. Phys.*, 2007, **9**, 3397-3406.
5. S. Grimme, *J. Comput. Chem.*, 2004, **25**, 1463-1473.
6. J. Antony and S. Grimme, *Phys. Chem. Chem. Phys.*, 2006, **8**, 5287-5293.
7. R. Ahlrichs, M. Bär, M. Häser, H. Horn and C. Kölmel, *Chem. Phys. Lett.*, 1989, **162**, 165-169.
8. Turbomole V6.3 2011, a development of University of Karlsruhe and Forschungszentrum Karlsruhe GmbH, 1989–2007, Turbomole GmbH, since 2007; available at: <http://www.turbomole.com> (accessed January 17, 2014).

### Cartesian coordinates for stationary points in Table S4

ωB97X-D/SVP in the gas phase

*(P,P)*-trans-1

|   |           |           |           |
|---|-----------|-----------|-----------|
| C | 0.094104  | -0.492808 | -1.971320 |
| C | -0.477461 | -1.818807 | -2.561913 |
| C | -1.443523 | -2.551382 | -1.614981 |
| C | -2.420744 | -1.581910 | -1.006098 |
| C | -1.884092 | -0.428467 | -0.457960 |
| C | -0.402693 | -0.330544 | -0.541171 |
| C | -2.739999 | 0.583257  | 0.074032  |
| C | -4.146923 | 0.349942  | 0.104447  |
| C | -4.659972 | -0.863637 | -0.427087 |
| C | -3.819602 | -1.795788 | -0.983149 |
| C | -5.000821 | 1.347742  | 0.651527  |
| C | -4.491182 | 2.530278  | 1.127068  |
| C | -3.097723 | 2.776588  | 1.065943  |
| C | -2.247290 | 1.828994  | 0.552214  |
| C | 0.402696  | -0.330548 | 0.541181  |
| H | 1.189703  | -0.565888 | -1.949579 |
| C | 1.884095  | -0.428467 | 0.457960  |
| C | 2.420755  | -1.581915 | 1.006082  |
| C | 1.443540  | -2.551392 | 1.614969  |
| C | 0.477502  | -1.818815 | 2.561922  |
| C | -0.094094 | -0.492827 | 1.971331  |
| C | 3.819614  | -1.795786 | 0.983122  |
| C | 4.659977  | -0.863625 | 0.427067  |
| C | 4.146919  | 0.349956  | -0.104453 |
| C | 2.739994  | 0.583264  | -0.074030 |
| C | -0.290898 | 0.707184  | -2.842892 |
| C | 2.247274  | 1.828999  | -0.552205 |
| C | 3.097699  | 2.776602  | -1.065930 |
| C | 4.491160  | 2.530302  | -1.127060 |
| C | 5.000809  | 1.347766  | -0.651529 |
| H | -1.189691 | -0.565934 | 1.949590  |
| C | 0.290878  | 0.707171  | 2.842908  |
| H | -1.014885 | -1.594209 | -3.496686 |
| H | 0.347142  | -2.495489 | -2.830918 |
| H | -0.863592 | -3.028077 | -0.805832 |
| H | -1.966433 | -3.359152 | -2.148079 |
| H | -5.738662 | -1.036890 | -0.400191 |
| H | -4.226074 | -2.717206 | -1.408298 |
| H | -6.076870 | 1.157970  | 0.681436  |
| H | -5.158957 | 3.288292  | 1.542080  |
| H | -2.699334 | 3.727664  | 1.426223  |
| H | -1.175010 | 2.021074  | 0.494646  |
| H | 1.966456  | -3.359167 | 2.148054  |
| H | 0.863594  | -3.028077 | 0.805827  |
| H | 1.014954  | -1.594202 | 3.496675  |
| H | -0.347088 | -2.495500 | 2.830962  |
| H | 4.226092  | -2.717207 | 1.408259  |
| H | 5.738667  | -1.036873 | 0.400163  |
| H | 1.174992  | 2.021068  | -0.494636 |
| H | 2.699302  | 3.727677  | -1.426205 |
| H | 5.158929  | 3.288323  | -1.542070 |
| H | 6.076859  | 1.158001  | -0.681443 |
| H | -0.072778 | 0.568075  | 3.872663  |
| H | -0.143165 | 1.641469  | 2.459709  |
| H | 1.385198  | 0.828354  | 2.883720  |
| H | -1.385221 | 0.828336  | -2.883711 |
| H | 0.072769  | 0.568106  | -3.872646 |

|                        |           |           |           |           |
|------------------------|-----------|-----------|-----------|-----------|
| <i>(P,P)</i> -trans-1* | H         | 0.143115  | 1.641490  | -2.459682 |
|                        | C         | 0.461199  | -2.220521 | 1.480559  |
|                        | C         | 1.820243  | -2.843134 | 1.793789  |
|                        | C         | 2.811341  | -1.763797 | 2.186833  |
|                        | C         | 2.905152  | -0.687151 | 1.138120  |
|                        | C         | 1.792316  | -0.360281 | 0.309472  |
|                        | C         | 0.579554  | -1.105261 | 0.440512  |
|                        | C         | 1.966565  | 0.748503  | -0.637865 |
|                        | C         | 3.244267  | 1.380370  | -0.763707 |
|                        | C         | 4.318622  | 0.971666  | 0.060225  |
|                        | C         | 4.132118  | -0.023545 | 0.991271  |
|                        | C         | 3.428045  | 2.432155  | -1.703140 |
|                        | C         | 2.392110  | 2.881599  | -2.483425 |
|                        | C         | 1.119575  | 2.293652  | -2.338487 |
|                        | C         | 0.921676  | 1.265620  | -1.441626 |
|                        | C         | -0.575983 | -1.104208 | -0.444991 |
|                        | H         | -0.177320 | -3.005979 | 1.041925  |
|                        | C         | -1.791167 | -0.363938 | -0.310849 |
|                        | C         | -2.901092 | -0.687207 | -1.144804 |
|                        | C         | -2.803056 | -1.758195 | -2.198998 |
|                        | C         | -1.809800 | -2.837142 | -1.810362 |
|                        | C         | -0.452791 | -2.212766 | -1.491736 |
|                        | C         | -4.128770 | -0.024678 | -0.999227 |
|                        | C         | -4.319275 | 0.966044  | -0.064232 |
|                        | C         | -3.248694 | 1.369383  | 0.767217  |
|                        | C         | -1.970658 | 0.737556  | 0.644124  |
|                        | C         | -0.278235 | -1.742271 | 2.742378  |
|                        | C         | -0.930520 | 1.247535  | 1.458545  |
|                        | C         | -1.132587 | 2.269345  | 2.361488  |
|                        | C         | -2.405222 | 2.858131  | 2.502206  |
|                        | C         | -3.436795 | 2.415136  | 1.712536  |
|                        | H         | 0.187255  | -2.999402 | -1.057329 |
|                        | C         | 0.286600  | -1.724685 | -2.749706 |
|                        | H         | 1.716885  | -3.593901 | 2.593309  |
|                        | H         | 2.191223  | -3.368855 | 0.898200  |
|                        | H         | 3.808903  | -2.193964 | 2.362502  |
|                        | H         | 2.505674  | -1.309939 | 3.147401  |
| H                      | 5.289483  | 1.461265  | -0.045681 |           |
| H                      | 4.963759  | -0.324356 | 1.634311  |           |
| H                      | 4.419411  | 2.885102  | -1.784604 |           |
| H                      | 2.547042  | 3.691983  | -3.198975 |           |
| H                      | 0.277306  | 2.656134  | -2.931600 |           |
| H                      | -0.074985 | 0.844238  | -1.355631 |           |
| H                      | -2.497475 | -1.298822 | -3.156960 |           |
| H                      | -3.799330 | -2.190012 | -2.378009 |           |
| H                      | -1.703333 | -3.583300 | -2.613781 |           |
| H                      | -2.180675 | -3.368708 | -0.918175 |           |
| H                      | -4.957642 | -0.322336 | -1.647316 |           |
| H                      | -5.290371 | 1.455578  | 0.039668  |           |
| H                      | 0.066081  | 0.824994  | 1.376448  |           |
| H                      | -0.293851 | 2.625989  | 2.963102  |           |
| H                      | -2.563685 | 3.663854  | 3.222238  |           |
| H                      | -4.428214 | 2.868454  | 1.791264  |           |
| H                      | 1.290118  | -1.356000 | -2.495205 |           |
| H                      | -0.246219 | -0.902765 | -3.250023 |           |
| H                      | 0.395886  | -2.553717 | -3.467230 |           |
| H                      | 0.253218  | -0.922524 | 3.247731  |           |
| H                      | -0.384744 | -2.576335 | 3.454415  |           |
| H                      | -1.282837 | -1.374154 | 2.491297  |           |
| <i>(M,M)</i> -cis-2    | C         | -2.876352 | 1.490702  | -0.031709 |

|   |           |           |           |
|---|-----------|-----------|-----------|
| C | -2.682172 | 2.957196  | 0.364355  |
| C | -1.437510 | 3.532918  | -0.302380 |
| C | -0.230984 | 2.765199  | 0.164784  |
| C | -0.359710 | 1.427092  | 0.526513  |
| C | -1.583924 | 0.671307  | 0.151540  |
| C | 0.728175  | 0.817187  | 1.258714  |
| C | 1.996756  | 1.463733  | 1.287451  |
| C | 2.123604  | 2.769967  | 0.743999  |
| C | 1.019150  | 3.423034  | 0.269817  |
| C | 3.105316  | 0.815260  | 1.896192  |
| C | 2.958352  | -0.398836 | 2.517986  |
| C | 1.677384  | -0.991421 | 2.592401  |
| C | 0.597870  | -0.398406 | 1.984422  |
| C | -1.585102 | -0.668614 | -0.151546 |
| H | -3.674973 | 1.078344  | 0.601686  |
| C | -0.362280 | -1.426438 | -0.526908 |
| C | -0.235882 | -2.764953 | -0.165746 |
| C | -1.443744 | -3.531311 | 0.300365  |
| C | -2.687675 | -2.952286 | -0.364814 |
| C | -2.878613 | -1.485918 | 0.033064  |
| C | 1.013324  | -3.424645 | -0.270379 |
| C | 2.119002  | -2.773157 | -0.743859 |
| C | 1.994329  | -1.466694 | -1.287280 |
| C | 0.726711  | -0.818258 | -1.258929 |
| C | -3.365847 | 1.424271  | -1.491540 |
| C | 0.598366  | 0.397403  | -1.984849 |
| C | 1.678919  | 0.988726  | -2.592619 |
| C | 2.959021  | 0.394361  | -2.517661 |
| C | 3.104037  | -0.819877 | -1.895672 |
| H | -3.677678 | -1.071614 | -0.598451 |
| C | -3.365499 | -1.419773 | 1.493782  |
| H | -3.579024 | 3.532588  | 0.086607  |
| H | -2.566585 | 3.043155  | 1.456966  |
| H | -1.309983 | 4.595598  | -0.045639 |
| H | -1.534267 | 3.498964  | -1.401502 |
| H | 3.098630  | 3.262469  | 0.765572  |
| H | 1.095779  | 4.460032  | -0.068140 |
| H | 4.077503  | 1.313912  | 1.872992  |
| H | 3.816306  | -0.889432 | 2.982571  |
| H | 1.542557  | -1.927374 | 3.138653  |
| H | -0.384266 | -0.860491 | 2.065708  |
| H | -1.540024 | -3.499559 | 1.399587  |
| H | -1.318103 | -4.593685 | 0.041381  |
| H | -3.585478 | -3.526242 | -0.087180 |
| H | -2.573009 | -3.037101 | -1.457618 |
| H | 1.088157  | -4.461867 | 0.067301  |
| H | 3.093328  | -3.267063 | -0.765007 |
| H | -0.383110 | 0.860833  | -2.066570 |
| H | 1.545584  | 1.924758  | -3.139108 |
| H | 3.817812  | 0.883725  | -2.981989 |
| H | 4.075517  | -1.319895 | -1.872092 |
| H | -3.517477 | -0.390826 | 1.841427  |
| H | -2.639561 | -1.879070 | 2.180862  |
| H | -4.318910 | -1.959337 | 1.605679  |
| H | -2.640551 | 1.882437  | -2.180054 |
| H | -4.318881 | 1.964763  | -1.602094 |
| H | -3.519426 | 0.395355  | -1.838498 |
| C | 2.152236  | -1.764881 | 1.078091  |
| C | 3.314399  | -2.140133 | 0.171764  |
| C | 4.036041  | -0.868025 | -0.230005 |
| C | 3.154495  | 0.364918  | -0.288185 |

TS<sub>2</sub>

|   |           |           |           |
|---|-----------|-----------|-----------|
| C | 1.756710  | 0.377892  | -0.171382 |
| C | 1.133344  | -0.942354 | 0.287400  |
| C | 1.114846  | 1.670660  | -0.416288 |
| C | 1.898096  | 2.869868  | -0.430132 |
| C | 3.312927  | 2.788718  | -0.417388 |
| C | 3.904978  | 1.565060  | -0.429678 |
| C | 1.277637  | 4.143008  | -0.537106 |
| C | -0.077194 | 4.265874  | -0.715411 |
| C | -0.843448 | 3.092137  | -0.850133 |
| C | -0.258615 | 1.854399  | -0.715831 |
| C | -0.091336 | -1.517616 | 0.111169  |
| H | 1.668638  | -2.676985 | 1.405434  |
| C | -1.378101 | -0.899994 | -0.329327 |
| C | -1.878205 | -1.307307 | -1.551276 |
| C | -1.014210 | -2.271420 | -2.313973 |
| C | -0.568563 | -3.424066 | -1.387776 |
| C | -0.460281 | -3.034051 | 0.114444  |
| C | -3.144419 | -0.853367 | -1.991395 |
| C | -3.906211 | -0.038417 | -1.192416 |
| C | -3.455818 | 0.336913  | 0.103404  |
| C | -2.182657 | -0.115488 | 0.557486  |
| C | 2.578339  | -1.066675 | 2.378432  |
| C | -1.743299 | 0.270624  | 1.852613  |
| C | -2.525493 | 1.066336  | 2.653413  |
| C | -3.786383 | 1.522493  | 2.200091  |
| C | -4.239330 | 1.163098  | 0.954817  |
| H | -1.482539 | -3.059200 | 0.522596  |
| C | 0.273239  | -4.155945 | 0.852693  |
| H | 4.005141  | -2.839356 | 0.670234  |
| H | 2.911486  | -2.661109 | -0.711867 |
| H | 4.532378  | -0.980062 | -1.208304 |
| H | 4.847050  | -0.661246 | 0.487520  |
| H | 3.905165  | 3.706386  | -0.447973 |
| H | 4.993369  | 1.484163  | -0.493252 |
| H | 1.916207  | 5.029597  | -0.502805 |
| H | -0.543889 | 5.249332  | -0.800874 |
| H | -1.909826 | 3.151503  | -1.079113 |
| H | -0.868652 | 0.989650  | -0.911221 |
| H | -0.121539 | -1.735305 | -2.675007 |
| H | -1.532005 | -2.661455 | -3.201828 |
| H | 0.411511  | -3.799692 | -1.724050 |
| H | -1.276065 | -4.264480 | -1.470865 |
| H | -3.512109 | -1.160413 | -2.973871 |
| H | -4.879401 | 0.320546  | -1.536734 |
| H | -0.763203 | -0.063587 | 2.195891  |
| H | -2.170067 | 1.356011  | 3.644642  |
| H | -4.396703 | 2.159942  | 2.843450  |
| H | -5.212153 | 1.510915  | 0.597576  |
| H | 0.324079  | -3.987315 | 1.937587  |
| H | 1.287560  | -4.340798 | 0.471344  |
| H | -0.298060 | -5.085133 | 0.697755  |
| H | 3.086638  | -0.105738 | 2.217939  |
| H | 3.257358  | -1.720195 | 2.949122  |
| H | 1.697288  | -0.869543 | 3.007993  |
| C | -2.874185 | 0.256758  | -1.309666 |
| C | -3.778991 | 1.104617  | -0.378914 |
| C | -3.261655 | 1.123254  | 1.063530  |
| C | -1.860985 | 1.682712  | 1.046261  |
| C | -1.003516 | 1.225856  | 0.054305  |
| C | -1.516348 | 0.015459  | -0.664352 |
| C | 0.229461  | 1.906317  | -0.178567 |

(*M,P*)-cis-2

|   |           |           |           |
|---|-----------|-----------|-----------|
| C | 0.654151  | 2.911771  | 0.740506  |
| C | -0.198533 | 3.268382  | 1.817818  |
| C | -1.441958 | 2.700667  | 1.936253  |
| C | 1.900259  | 3.563261  | 0.526269  |
| C | 2.664329  | 3.278468  | -0.577976 |
| C | 2.202855  | 2.342035  | -1.533381 |
| C | 1.018592  | 1.677883  | -1.335890 |
| C | -0.947206 | -1.198852 | -0.492920 |
| H | -3.364777 | -0.707593 | -1.456583 |
| C | 0.288297  | -1.393999 | 0.328301  |
| C | 0.050640  | -1.864635 | 1.607222  |
| C | -1.382143 | -2.189024 | 1.943961  |
| C | -2.095494 | -2.945514 | 0.791798  |
| C | -1.569583 | -2.591088 | -0.630714 |
| C | 1.129849  | -2.056526 | 2.503196  |
| C | 2.421079  | -1.827163 | 2.097267  |
| C | 2.704291  | -1.501863 | 0.743575  |
| C | 1.622892  | -1.332076 | -0.169886 |
| C | -2.704509 | 0.912652  | -2.683040 |
| C | 1.918483  | -1.207619 | -1.555147 |
| C | 3.215338  | -1.168349 | -2.001932 |
| C | 4.289645  | -1.233739 | -1.081398 |
| C | 4.037592  | -1.404349 | 0.257118  |
| H | -0.709576 | -3.251485 | -0.826373 |
| C | -2.585348 | -2.919827 | -1.724954 |
| H | -3.811635 | 2.145524  | -0.740254 |
| H | -4.811449 | 0.723998  | -0.419181 |
| H | -3.280669 | 0.099669  | 1.474686  |
| H | -3.911247 | 1.735705  | 1.706193  |
| H | 0.131488  | 4.033630  | 2.524655  |
| H | -2.121862 | 3.024771  | 2.728605  |
| H | 2.231042  | 4.311177  | 1.251418  |
| H | 3.617598  | 3.788192  | -0.733386 |
| H | 2.793071  | 2.144720  | -2.430677 |
| H | 0.652495  | 0.973437  | -2.080696 |
| H | -1.913402 | -1.243793 | 2.135633  |
| H | -1.440427 | -2.770634 | 2.875502  |
| H | -3.172360 | -2.713055 | 0.835968  |
| H | -2.003164 | -4.032342 | 0.944609  |
| H | 0.924811  | -2.384011 | 3.525791  |
| H | 3.251173  | -1.948558 | 2.797598  |
| H | 1.088643  | -1.162125 | -2.263607 |
| H | 3.422192  | -1.082686 | -3.071045 |
| H | 5.318372  | -1.174291 | -1.443503 |
| H | 4.862231  | -1.495632 | 0.968777  |
| H | -2.281976 | -2.499448 | -2.695159 |
| H | -3.600946 | -2.566320 | -1.498281 |
| H | -2.652182 | -4.012641 | -1.840949 |
| H | -2.166510 | 1.870257  | -2.592524 |
| H | -3.682875 | 1.116622  | -3.145952 |
| H | -2.131838 | 0.264097  | -3.363116 |

TS<sub>3</sub>

|   |          |           |           |
|---|----------|-----------|-----------|
| C | 0.669938 | -2.930516 | -0.211344 |
| C | 1.008639 | -3.158835 | -1.714756 |
| C | 1.428060 | -1.885974 | -2.480300 |
| C | 2.078698 | -0.890560 | -1.563603 |
| C | 1.415651 | -0.631013 | -0.377325 |
| C | 0.231479 | -1.466519 | -0.061494 |
| C | 1.980573 | 0.265836  | 0.587613  |
| C | 3.193030 | 0.942015  | 0.264309  |
| C | 3.822814 | 0.683375  | -0.983623 |

|   |           |           |           |
|---|-----------|-----------|-----------|
| C | 3.285585  | -0.217762 | -1.868255 |
| C | 3.738692  | 1.870032  | 1.193243  |
| C | 3.115836  | 2.117375  | 2.391085  |
| C | 1.918042  | 1.438297  | 2.717401  |
| C | 1.366414  | 0.537296  | 1.840215  |
| C | -1.048843 | -1.114971 | 0.255162  |
| H | -0.173232 | -3.588384 | 0.003619  |
| C | -1.882157 | 0.109807  | -0.101109 |
| C | -3.270196 | -0.096950 | -0.095314 |
| C | -3.952938 | -1.454465 | -0.074763 |
| C | -3.038095 | -2.626280 | 0.254831  |
| C | -1.911237 | -2.067511 | 1.112844  |
| C | -4.181817 | 0.993288  | -0.110074 |
| C | -3.753853 | 2.285436  | -0.121025 |
| C | -2.374318 | 2.554335  | -0.305363 |
| C | -1.444176 | 1.470338  | -0.409033 |
| C | 1.845609  | -3.334314 | 0.686026  |
| C | -0.160269 | 1.824610  | -0.900375 |
| C | 0.230001  | 3.127969  | -1.103417 |
| C | -0.654709 | 4.192499  | -0.841732 |
| C | -1.943411 | 3.897422  | -0.475854 |
| H | -2.389088 | -1.364751 | 1.818148  |
| C | -1.264629 | -3.092051 | 2.048947  |
| H | 1.816575  | -3.904434 | -1.774187 |
| H | 0.136695  | -3.600952 | -2.218948 |
| H | 0.526666  | -1.416571 | -2.909096 |
| H | 2.084273  | -2.137610 | -3.325948 |
| H | 4.750401  | 1.208592  | -1.224712 |
| H | 3.783452  | -0.417949 | -2.820471 |
| H | 4.666805  | 2.386206  | 0.934467  |
| H | 3.541908  | 2.835775  | 3.094764  |
| H | 1.427765  | 1.635286  | 3.673099  |
| H | 0.436548  | 0.027420  | 2.093042  |
| H | -4.457835 | -1.591506 | -1.045621 |
| H | -4.759963 | -1.409907 | 0.675269  |
| H | -2.615031 | -3.086790 | -0.653066 |
| H | -3.598693 | -3.413906 | 0.782691  |
| H | -5.251317 | 0.772120  | -0.060409 |
| H | -4.460434 | 3.116047  | -0.054305 |
| H | 0.528613  | 1.046392  | -1.188991 |
| H | 1.232233  | 3.326189  | -1.489381 |
| H | -0.336060 | 5.227833  | -0.979284 |
| H | -2.680095 | 4.693908  | -0.342503 |
| H | -0.357097 | -2.692126 | 2.521948  |
| H | -1.012664 | -4.050951 | 1.578236  |
| H | -1.983071 | -3.319129 | 2.851625  |
| H | 2.764410  | -2.794007 | 0.413643  |
| H | 2.047390  | -4.411898 | 0.583055  |
| H | 1.640361  | -3.128136 | 1.745817  |

(*P,P*)-*cis*-2

|   |           |          |           |
|---|-----------|----------|-----------|
| C | -2.886604 | 1.465235 | -0.295898 |
| C | -2.724679 | 2.897229 | 0.264849  |
| C | -1.546178 | 3.002900 | 1.235164  |
| C | -0.294145 | 2.609115 | 0.498885  |
| C | -0.355654 | 1.472545 | -0.292955 |
| C | -1.595419 | 0.659648 | -0.158734 |
| C | 0.764280  | 1.110944 | -1.107041 |
| C | 1.987083  | 1.825708 | -0.954001 |
| C | 2.032256  | 2.942748 | -0.077582 |
| C | 0.908532  | 3.347563 | 0.596359  |
| C | 3.129961  | 1.413046 | -1.693017 |
| C | 3.058790  | 0.362002 | -2.572294 |



|   |           |           |           |
|---|-----------|-----------|-----------|
| C | 1.827144  | -0.305968 | -2.774891 |
| C | 0.711471  | 0.062970  | -2.066023 |
| C | -1.595676 | -0.659324 | 0.158764  |
| H | -3.663798 | 0.971269  | 0.303590  |
| C | -0.356163 | -1.472581 | 0.293105  |
| C | -0.294891 | -2.609176 | -0.498725 |
| C | -1.547025 | -3.002843 | -1.234922 |
| C | -2.725425 | -2.896670 | -0.264556 |
| C | -2.887252 | -1.464400 | 0.295390  |
| C | 0.907664  | -3.347819 | -0.596274 |
| C | 2.031495  | -2.943204 | 0.077605  |
| C | 1.986547  | -1.826190 | 0.954066  |
| C | 0.763870  | -1.111225 | 1.107178  |
| C | -3.348979 | 1.489227  | -1.756318 |
| C | 0.711265  | -0.063315 | 2.066237  |
| C | 1.827020  | 0.305403  | 2.775089  |
| C | 3.058555  | -0.362740 | 2.572387  |
| C | 3.129521  | -1.413749 | 1.693054  |
| H | -3.663725 | -0.970423 | -0.305051 |
| C | -3.350863 | -1.487680 | 1.755413  |
| H | -2.544210 | 3.603174  | -0.562355 |
| H | -3.662199 | 3.211872  | 0.748546  |
| H | -1.713631 | 2.330554  | 2.097141  |
| H | -1.455627 | 4.021687  | 1.640063  |
| H | 2.972736  | 3.487960  | 0.033691  |
| H | 0.940993  | 4.229079  | 1.242175  |
| H | 4.069312  | 1.953227  | -1.550407 |
| H | 3.944405  | 0.050721  | -3.130522 |
| H | 1.764885  | -1.118163 | -3.502268 |
| H | -0.238094 | -0.444996 | -2.234053 |
| H | -1.456676 | -4.021760 | -1.639540 |
| H | -1.714335 | -2.330705 | -2.097092 |
| H | -2.544813 | -3.602153 | 0.563014  |
| H | -3.663043 | -3.211567 | -0.747906 |
| H | 0.939936  | -4.229337 | -1.242098 |
| H | 2.971884  | -3.488559 | -0.033742 |
| H | -0.238229 | 0.444755  | 2.234363  |
| H | 1.764917  | 1.117548  | 3.502534  |
| H | 3.944249  | -0.051624 | 3.130586  |
| H | 4.068782  | -1.954065 | 1.550376  |
| H | -3.554802 | -0.472466 | 2.128310  |
| H | -2.571848 | -1.929982 | 2.396580  |
| H | -4.268011 | -2.086603 | 1.870413  |
| H | -2.569300 | 1.931509  | -2.396688 |
| H | -4.265850 | 2.088466  | -1.871877 |
| H | -3.552925 | 0.474179  | -2.129678 |

(*P,P*)-*cis*-2\*

|   |           |           |           |
|---|-----------|-----------|-----------|
| C | 2.647342  | 1.942866  | 0.169096  |
| C | 2.238834  | 3.401658  | -0.122276 |
| C | 0.968216  | 3.478771  | -0.952664 |
| C | -0.137496 | 2.761486  | -0.233868 |
| C | 0.180947  | 1.521541  | 0.394424  |
| C | 1.471053  | 0.968761  | 0.115596  |
| C | -0.883350 | 0.813670  | 1.096499  |
| C | -2.240545 | 1.222018  | 0.897280  |
| C | -2.506087 | 2.379492  | 0.145431  |
| C | -1.459513 | 3.164934  | -0.347585 |
| C | -3.285729 | 0.436235  | 1.463097  |
| C | -3.004185 | -0.653844 | 2.253358  |
| C | -1.664787 | -0.996121 | 2.523281  |
| C | -0.629911 | -0.253204 | 1.976306  |
| C | 1.693988  | -0.406042 | -0.192861 |

|   |           |           |           |
|---|-----------|-----------|-----------|
| H | 3.389142  | 1.640106  | -0.587902 |
| C | 0.659894  | -1.343705 | -0.498262 |
| C | 0.804350  | -2.704265 | -0.044472 |
| C | 2.160385  | -3.273173 | 0.276665  |
| C | 3.141095  | -2.209119 | 0.750315  |
| C | 3.105558  | -0.981807 | -0.166882 |
| C | -0.334886 | -3.455820 | 0.196218  |
| C | -1.621393 | -2.971945 | -0.079324 |
| C | -1.786728 | -1.774826 | -0.793262 |
| C | -0.631692 | -0.980587 | -1.088874 |
| C | 3.312596  | 1.892754  | 1.558037  |
| C | -0.782251 | 0.098761  | -1.973469 |
| C | -2.034479 | 0.485879  | -2.436186 |
| C | -3.183385 | -0.232509 | -2.061792 |
| C | -3.061860 | -1.342125 | -1.255741 |
| H | 3.799981  | -0.249767 | 0.256862  |
| C | 3.592646  | -1.283575 | -1.590325 |
| H | 2.055360  | 3.929265  | 0.827965  |
| H | 3.073598  | 3.923307  | -0.615192 |
| H | 1.136041  | 2.997930  | -1.935662 |
| H | 0.684084  | 4.522198  | -1.155363 |
| H | -3.542904 | 2.686435  | -0.010556 |
| H | -1.688369 | 4.075990  | -0.907158 |
| H | -4.320734 | 0.729187  | 1.271016  |
| H | -3.815234 | -1.249078 | 2.678331  |
| H | -1.437449 | -1.836240 | 3.182284  |
| H | 0.404817  | -0.521526 | 2.193924  |
| H | 2.561222  | -3.751155 | -0.635726 |
| H | 2.066374  | -4.077516 | 1.021882  |
| H | 4.161807  | -2.621855 | 0.796485  |
| H | 2.878104  | -1.889929 | 1.773283  |
| H | -0.224344 | -4.442272 | 0.654918  |
| H | -2.498879 | -3.573752 | 0.168412  |
| H | 0.103704  | 0.658370  | -2.277955 |
| H | -2.119603 | 1.343416  | -3.106444 |
| H | -4.165845 | 0.085859  | -2.417192 |
| H | -3.941444 | -1.930500 | -0.983451 |
| H | 3.635144  | -0.359449 | -2.186850 |
| H | 2.916722  | -1.975844 | -2.114224 |
| H | 4.601394  | -1.726683 | -1.574837 |
| H | 2.579922  | 2.184091  | 2.326311  |
| H | 4.157193  | 2.598910  | 1.604475  |
| H | 3.689461  | 0.895186  | 1.821872  |

(*M,M*)-*trans*-1

|   |           |           |           |
|---|-----------|-----------|-----------|
| C | 0.338463  | -1.918636 | -0.880039 |
| C | -0.711520 | -2.975264 | -1.270820 |
| C | -1.825106 | -2.354330 | -2.114596 |
| C | -2.567467 | -1.407167 | -1.216795 |
| C | -1.818111 | -0.619393 | -0.351443 |
| C | -0.339750 | -0.571245 | -0.528103 |
| C | -2.497056 | 0.091414  | 0.703102  |
| C | -3.924714 | 0.121910  | 0.713803  |
| C | -4.645530 | -0.597206 | -0.274729 |
| C | -3.980301 | -1.374990 | -1.186272 |
| C | -4.608418 | 0.843174  | 1.731902  |
| C | -3.920425 | 1.480323  | 2.732469  |
| C | -2.507916 | 1.408228  | 2.761121  |
| C | -1.821758 | 0.739615  | 1.776711  |
| C | 0.340621  | 0.614201  | -0.481575 |
| H | 0.874880  | -2.302655 | 0.001601  |
| C | 1.818640  | 0.646992  | -0.299681 |
| C | 2.570528  | 1.496889  | -1.101691 |

|   |           |           |           |
|---|-----------|-----------|-----------|
| C | 1.831038  | 2.511419  | -1.925279 |
| C | 0.716485  | 3.067247  | -1.038430 |
| C | -0.335283 | 1.985300  | -0.730434 |
| C | 3.983269  | 1.458749  | -1.072978 |
| C | 4.645898  | 0.610950  | -0.224050 |
| C | 3.922399  | -0.180304 | 0.705684  |
| C | 2.494936  | -0.144482 | 0.697306  |
| C | 1.353217  | -1.797608 | -2.027929 |
| C | 1.816956  | -0.871261 | 1.717582  |
| C | 2.500621  | -1.616790 | 2.646936  |
| C | 3.912850  | -1.691725 | 2.612382  |
| C | 4.603419  | -0.981028 | 1.664500  |
| H | -0.871637 | 2.302433  | 0.177305  |
| C | -1.349082 | 1.953014  | -1.885005 |
| H | -0.211854 | -3.792841 | -1.811693 |
| H | -1.168858 | -3.420476 | -0.372956 |
| H | -2.509170 | -3.120701 | -2.507847 |
| H | -1.395966 | -1.831064 | -2.986793 |
| H | -5.737544 | -0.556551 | -0.268860 |
| H | -4.538952 | -1.978595 | -1.906228 |
| H | -5.700965 | 0.866937  | 1.708343  |
| H | -4.456292 | 2.025005  | 3.512634  |
| H | -1.957063 | 1.883231  | 3.575900  |
| H | -0.734267 | 0.695041  | 1.823522  |
| H | 1.402998  | 2.057001  | -2.835774 |
| H | 2.516807  | 3.304661  | -2.257463 |
| H | 0.218382  | 3.923755  | -1.516845 |
| H | 1.172789  | 3.443034  | -0.108843 |
| H | 4.544117  | 2.114121  | -1.744322 |
| H | 5.737773  | 0.566594  | -0.221205 |
| H | 0.729602  | -0.826181 | 1.767800  |
| H | 1.947749  | -2.151604 | 3.422340  |
| H | 4.446804  | -2.297850 | 3.347192  |
| H | 5.695866  | -1.006994 | 1.638973  |
| H | -0.868619 | 1.628139  | -2.821694 |
| H | -1.761856 | 2.960175  | -2.045828 |
| H | -2.193623 | 1.281710  | -1.698600 |
| H | 0.874172  | -1.399564 | -2.936702 |
| H | 1.764229  | -2.789887 | -2.266670 |
| H | 2.199085  | -1.144838 | -1.789188 |

TS<sub>5</sub>

|   |           |           |           |
|---|-----------|-----------|-----------|
| C | -0.345151 | -0.880915 | 1.499065  |
| C | -0.440397 | -2.400440 | 1.317973  |
| C | 0.471749  | -2.859263 | 0.188112  |
| C | 1.728302  | -2.032737 | 0.078028  |
| C | 1.697625  | -0.625874 | 0.044158  |
| C | 0.293251  | -0.087192 | 0.333740  |
| C | 2.976217  | 0.036084  | -0.204442 |
| C | 4.185286  | -0.740013 | -0.257940 |
| C | 4.139489  | -2.147817 | -0.143986 |
| C | 2.934279  | -2.767778 | -0.013600 |
| C | 5.451301  | -0.119983 | -0.449970 |
| C | 5.571236  | 1.232012  | -0.627683 |
| C | 4.395276  | 2.008276  | -0.633368 |
| C | 3.165884  | 1.428184  | -0.432088 |
| C | -0.456209 | 0.967372  | -0.145422 |
| H | -1.351737 | -0.484058 | 1.661974  |
| C | -1.950229 | 0.894694  | -0.091322 |
| C | -2.726719 | 2.015268  | 0.195700  |
| C | -2.140847 | 3.394032  | 0.049249  |
| C | -0.997472 | 3.327252  | -0.958053 |
| C | 0.090704  | 2.356668  | -0.485249 |

|   |           |           |           |
|---|-----------|-----------|-----------|
| C | -4.105065 | 1.872754  | 0.501368  |
| C | -4.730886 | 0.657962  | 0.436086  |
| C | -4.040388 | -0.455139 | -0.114621 |
| C | -2.660685 | -0.317189 | -0.446588 |
| C | 0.455406  | -0.518579 | 2.763501  |
| C | -2.076019 | -1.340107 | -1.239343 |
| C | -2.773916 | -2.472981 | -1.585427 |
| C | -4.098785 | -2.662911 | -1.133189 |
| C | -4.719541 | -1.664899 | -0.422771 |
| H | 0.829024  | 2.282899  | -1.295630 |
| C | 0.732855  | 2.942981  | 0.793011  |
| H | -0.153793 | -2.901963 | 2.255648  |
| H | -1.476284 | -2.698498 | 1.101613  |
| H | -0.066899 | -2.788932 | -0.766575 |
| H | 0.734628  | -3.919847 | 0.305181  |
| H | 5.069152  | -2.720092 | -0.183699 |
| H | 2.882043  | -3.857627 | 0.039499  |
| H | 6.335852  | -0.761839 | -0.464272 |
| H | 6.548019  | 1.695809  | -0.778142 |
| H | 4.451801  | 3.085454  | -0.805999 |
| H | 2.313394  | 2.078559  | -0.473847 |
| H | -1.802670 | 3.814279  | 1.010312  |
| H | -2.931225 | 4.071451  | -0.309245 |
| H | -0.549554 | 4.321875  | -1.108646 |
| H | -1.399292 | 3.000416  | -1.930724 |
| H | -4.664880 | 2.763525  | 0.799673  |
| H | -5.782897 | 0.552236  | 0.711429  |
| H | -1.060678 | -1.193484 | -1.604752 |
| H | -2.300935 | -3.228687 | -2.216844 |
| H | -4.636550 | -3.579927 | -1.383165 |
| H | -5.764198 | -1.769365 | -0.118690 |
| H | -0.032712 | 3.112911  | 1.562501  |
| H | 1.223702  | 3.907767  | 0.585821  |
| H | 1.468589  | 2.268319  | 1.243786  |
| H | 1.478739  | -0.922296 | 2.726443  |
| H | -0.042351 | -0.938887 | 3.651303  |
| H | 0.522397  | 0.571654  | 2.895476  |

(*M,P*)-*trans*-1

|   |           |           |           |
|---|-----------|-----------|-----------|
| C | 0.258858  | 1.362928  | 1.317752  |
| C | 0.048779  | 2.852391  | 0.910231  |
| C | -0.733484 | 3.020444  | -0.407117 |
| C | -1.940404 | 2.121607  | -0.398026 |
| C | -1.717818 | 0.800450  | -0.047908 |
| C | -0.295071 | 0.454536  | 0.224066  |
| C | -2.822015 | -0.075804 | 0.177643  |
| C | -4.140034 | 0.387290  | -0.107871 |
| C | -4.323817 | 1.723890  | -0.552323 |
| C | -3.253796 | 2.576308  | -0.665050 |
| C | -5.239072 | -0.496090 | 0.084485  |
| C | -5.049107 | -1.766035 | 0.568986  |
| C | -3.744596 | -2.209565 | 0.898893  |
| C | -2.663443 | -1.385754 | 0.708266  |
| C | 0.446637  | -0.452742 | -0.442880 |
| H | 1.333373  | 1.178674  | 1.426161  |
| C | 1.852793  | -0.798385 | -0.065606 |
| C | 2.051564  | -2.127807 | 0.273112  |
| C | 0.845970  | -3.032509 | 0.235984  |
| C | 0.024960  | -2.846719 | -1.057856 |
| C | 0.041755  | -1.386616 | -1.583821 |
| C | 3.343350  | -2.588908 | 0.623660  |
| C | 4.418373  | -1.736493 | 0.612140  |
| C | 4.264885  | -0.386677 | 0.198534  |

|   |           |           |           |
|---|-----------|-----------|-----------|
| C | 2.971234  | 0.085776  | -0.173908 |
| C | -0.393804 | 1.038256  | 2.666010  |
| C | 2.855766  | 1.414425  | -0.671747 |
| C | 3.948865  | 2.240976  | -0.751373 |
| C | 5.224078  | 1.784537  | -0.336768 |
| C | 5.375532  | 0.499521  | 0.120031  |
| H | 0.904076  | -1.316704 | -2.268959 |
| C | -1.181469 | -1.053105 | -2.433345 |
| H | -0.502911 | 3.373678  | 1.708380  |
| H | 1.023502  | 3.355348  | 0.821485  |
| H | -0.084476 | 2.749858  | -1.257874 |
| H | -1.022130 | 4.071673  | -0.552576 |
| H | -5.335733 | 2.073234  | -0.772005 |
| H | -3.408615 | 3.616280  | -0.963874 |
| H | -6.244931 | -0.138981 | -0.151148 |
| H | -5.901947 | -2.432271 | 0.715356  |
| H | -3.601176 | -3.209832 | 1.313682  |
| H | -1.659797 | -1.721803 | 0.968725  |
| H | 0.208445  | -2.788032 | 1.103016  |
| H | 1.141724  | -4.084291 | 0.360002  |
| H | -1.015250 | -3.155420 | -0.870967 |
| H | 0.411626  | -3.514134 | -1.843445 |
| H | 3.476551  | -3.636161 | 0.907177  |
| H | 5.411721  | -2.093301 | 0.895400  |
| H | 1.877870  | 1.765692  | -1.002194 |
| H | 3.836753  | 3.254252  | -1.143728 |
| H | 6.085437  | 2.453458  | -0.394515 |
| H | 6.359516  | 0.131977  | 0.422581  |
| H | -1.180837 | 0.003217  | -2.739187 |
| H | -2.129146 | -1.256380 | -1.920633 |
| H | -1.162388 | -1.668836 | -3.346275 |
| H | -1.483730 | 1.193639  | 2.632764  |
| H | 0.016186  | 1.683264  | 3.458496  |
| H | -0.206535 | -0.008863 | 2.949000  |

TS<sub>6</sub>

|   |           |           |           |
|---|-----------|-----------|-----------|
| C | 0.097449  | 2.167344  | 0.232491  |
| C | -0.555505 | 3.237245  | -0.699181 |
| C | -1.531758 | 2.662938  | -1.732012 |
| C | -2.443903 | 1.689268  | -1.046054 |
| C | -1.826694 | 0.729126  | -0.264125 |
| C | -0.339096 | 0.763189  | -0.174951 |
| C | -2.616893 | -0.175629 | 0.517429  |
| C | -4.037805 | -0.137322 | 0.382596  |
| C | -4.628568 | 0.815197  | -0.490004 |
| C | -3.851388 | 1.720693  | -1.167667 |
| C | -4.834100 | -1.042814 | 1.137669  |
| C | -4.259019 | -1.931969 | 2.010064  |
| C | -2.852881 | -1.947202 | 2.174381  |
| C | -2.056253 | -1.096000 | 1.448278  |
| C | 0.412486  | -0.334798 | -0.487249 |
| H | 1.170834  | 2.256175  | 0.070875  |
| C | 1.847363  | -0.715918 | -0.156581 |
| C | 2.138634  | -2.080711 | -0.313074 |
| C | 1.057058  | -3.132470 | -0.190475 |
| C | -0.233514 | -2.788531 | -0.938364 |
| C | -0.140208 | -1.377491 | -1.502127 |
| C | 3.467093  | -2.531726 | -0.513774 |
| C | 4.519062  | -1.659983 | -0.522711 |
| C | 4.307654  | -0.328398 | -0.086173 |
| C | 2.981004  | 0.114789  | 0.224033  |
| C | -0.234428 | 2.460492  | 1.700962  |
| C | 2.906500  | 1.285053  | 1.030907  |

|   |           |           |           |
|---|-----------|-----------|-----------|
| C | 4.005633  | 2.060243  | 1.318329  |
| C | 5.279205  | 1.714207  | 0.818731  |
| C | 5.421918  | 0.521632  | 0.156972  |
| H | 0.695188  | -1.405476 | -2.224581 |
| C | -1.356100 | -1.064753 | -2.374381 |
| H | -1.103873 | 3.963583  | -0.079215 |
| H | 0.235881  | 3.800808  | -1.215264 |
| H | -0.964837 | 2.143936  | -2.524531 |
| H | -2.098314 | 3.469343  | -2.220401 |
| H | -5.716160 | 0.830452  | -0.596177 |
| H | -4.315234 | 2.467951  | -1.816653 |
| H | -5.919782 | -1.010090 | 1.015272  |
| H | -4.882076 | -2.617392 | 2.588482  |
| H | -2.399389 | -2.638570 | 2.888220  |
| H | -0.974594 | -1.110936 | 1.585845  |
| H | 0.851584  | -3.238414 | 0.888070  |
| H | 1.456067  | -4.105208 | -0.511965 |
| H | -1.112290 | -2.875443 | -0.282674 |
| H | -0.394109 | -3.490945 | -1.771166 |
| H | 3.631643  | -3.594216 | -0.709425 |
| H | 5.530406  | -1.993281 | -0.766651 |
| H | 1.973451  | 1.523339  | 1.522977  |
| H | 3.891402  | 2.932103  | 1.966455  |
| H | 6.144791  | 2.349059  | 1.018437  |
| H | 6.410955  | 0.174110  | -0.152831 |
| H | -1.357659 | -1.784630 | -3.208385 |
| H | -1.307489 | -0.059385 | -2.811193 |
| H | -2.316671 | -1.173388 | -1.855435 |
| H | -1.324628 | 2.455390  | 1.855324  |
| H | 0.146430  | 3.449486  | 2.000610  |
| H | 0.190794  | 1.707428  | 2.382334  |

ωB97X-D/SVP in hexane

(*P,P*)-*trans*-1

|   |           |           |           |
|---|-----------|-----------|-----------|
| C | -0.098620 | -0.480036 | 1.971868  |
| C | 0.456292  | -1.813270 | 2.560919  |
| C | 1.434027  | -2.543540 | 1.624321  |
| C | 2.415658  | -1.575939 | 1.019326  |
| C | 1.884354  | -0.422402 | 0.464099  |
| C | 0.401829  | -0.320302 | 0.542249  |
| C | 2.747325  | 0.582724  | -0.071260 |
| C | 4.153706  | 0.342409  | -0.097258 |
| C | 4.660599  | -0.870147 | 0.442980  |
| C | 3.814165  | -1.795416 | 1.001617  |
| C | 5.014047  | 1.332477  | -0.649219 |
| C | 4.511035  | 2.513992  | -1.134859 |
| C | 3.118532  | 2.767239  | -1.079236 |
| C | 2.262076  | 1.827313  | -0.560709 |
| C | -0.401838 | -0.320325 | -0.542261 |
| H | -1.194570 | -0.539909 | 1.948775  |
| C | -1.884364 | -0.422409 | -0.464098 |
| C | -2.415685 | -1.575963 | -1.019273 |
| C | -1.434073 | -2.543592 | -1.624255 |
| C | -0.456354 | -1.813354 | -2.560891 |
| C | 0.098615  | -0.480131 | -1.971871 |
| C | -3.814193 | -1.795430 | -1.001532 |
| C | -4.660612 | -0.870136 | -0.442914 |
| C | -4.153701 | 0.342437  | 0.097270  |
| C | -2.747320 | 0.582742  | 0.071241  |
| C | 0.296321  | 0.714442  | 2.845855  |
| C | -2.262054 | 1.827344  | 0.560639  |
| C | -3.118495 | 2.767293  | 1.079148  |
| C | -4.510998 | 2.514058  | 1.134803  |
| C | -5.014027 | 1.332530  | 0.649212  |
| H | 1.194563  | -0.540056 | -1.948760 |
| C | -0.296255 | 0.714336  | -2.845906 |
| H | 0.976500  | -1.599410 | 3.507797  |
| H | -0.376058 | -2.488844 | 2.808206  |
| H | 0.862523  | -3.023443 | 0.810945  |
| H | 1.953883  | -3.349336 | 2.163360  |
| H | 5.738714  | -1.048109 | 0.419967  |
| H | 4.215489  | -2.716313 | 1.433078  |
| H | 6.089228  | 1.136903  | -0.675449 |
| H | 5.183439  | 3.265992  | -1.553747 |
| H | 2.725476  | 3.717290  | -1.448499 |
| H | 1.190618  | 2.025492  | -0.508676 |
| H | -1.953947 | -3.349397 | -2.163262 |
| H | -0.862558 | -3.023480 | -0.810877 |
| H | -0.976596 | -1.599487 | -3.507750 |
| H | 0.375971  | -2.488949 | -2.808208 |
| H | -4.215531 | -2.716341 | -1.432952 |
| H | -5.738727 | -1.048090 | -0.419877 |
| H | -1.190595 | 2.025513  | 0.508584  |
| H | -2.725425 | 3.717355  | 1.448373  |
| H | -5.183390 | 3.266077  | 1.553676  |
| H | -6.089209 | 1.136964  | 0.675466  |
| H | 0.090650  | 0.588956  | -3.869340 |
| H | 0.108865  | 1.658069  | -2.452808 |
| H | -1.391455 | 0.815777  | -2.910928 |
| H | 1.391527  | 0.815831  | 2.910862  |
| H | -0.090581 | 0.589120  | 3.869297  |
| H | -0.108755 | 1.658181  | 2.452725  |

*(P,P)*-trans-1\*

|   |           |           |           |
|---|-----------|-----------|-----------|
| C | 0.511553  | -2.247544 | 1.455925  |
| C | 1.873910  | -2.897765 | 1.690356  |
| C | 2.903292  | -1.843625 | 2.049980  |
| C | 2.948108  | -0.728872 | 1.038306  |
| C | 1.805116  | -0.386382 | 0.251979  |
| C | 0.598515  | -1.126306 | 0.418225  |
| C | 1.947331  | 0.752234  | -0.669183 |
| C | 3.207363  | 1.422060  | -0.785399 |
| C | 4.305512  | 1.004552  | 0.002796  |
| C | 4.158603  | -0.037915 | 0.889373  |
| C | 3.350096  | 2.519445  | -1.678980 |
| C | 2.293646  | 2.970788  | -2.431142 |
| C | 1.042984  | 2.333887  | -2.307192 |
| C | 0.884885  | 1.263277  | -1.452056 |
| C | -0.591765 | -1.122506 | -0.427519 |
| H | -0.162167 | -3.017690 | 1.044498  |
| C | -1.802012 | -0.389962 | -0.253185 |
| C | -2.941624 | -0.727900 | -1.046430 |
| C | -2.895004 | -1.836678 | -2.065237 |
| C | -1.853498 | -2.883872 | -1.722512 |
| C | -0.497414 | -2.221376 | -1.487811 |
| C | -4.152244 | -0.036325 | -0.900564 |
| C | -4.303356 | 0.999080  | -0.006921 |
| C | -3.211319 | 1.405916  | 0.795209  |
| C | -1.950953 | 0.736398  | 0.682467  |
| C | -0.147659 | -1.768663 | 2.759776  |
| C | -0.895253 | 1.236037  | 1.481762  |
| C | -1.060942 | 2.294630  | 2.350675  |
| C | -2.312028 | 2.931480  | 2.469947  |
| C | -3.361379 | 2.491660  | 1.701397  |
| H | 0.190417  | -2.990556 | -1.099263 |
| C | 0.143557  | -1.704138 | -2.786225 |
| H | 1.798107  | -3.657620 | 2.484170  |
| H | 2.188275  | -3.419476 | 0.771011  |
| H | 3.904398  | -2.290691 | 2.146373  |
| H | 2.668941  | -1.419843 | 3.044035  |
| H | 5.263079  | 1.521000  | -0.097537 |
| H | 5.011845  | -0.351354 | 1.497493  |
| H | 4.326823  | 3.005074  | -1.748478 |
| H | 2.416554  | 3.818363  | -3.109040 |
| H | 0.185500  | 2.689530  | -2.882613 |
| H | -0.095836 | 0.803103  | -1.383746 |
| H | -2.673286 | -1.404916 | -3.058537 |
| H | -3.893113 | -2.291725 | -2.156087 |
| H | -1.773800 | -3.633680 | -2.525484 |
| H | -2.156297 | -3.418637 | -0.806899 |
| H | -5.000269 | -0.342612 | -1.519399 |
| H | -5.259981 | 1.518477  | 0.088396  |
| H | 0.086462  | 0.777028  | 1.415445  |
| H | -0.210456 | 2.641171  | 2.941835  |
| H | -2.440488 | 3.770896  | 3.157001  |
| H | -4.337936 | 2.978532  | 1.766692  |
| H | 1.152017  | -1.310191 | -2.597094 |
| H | -0.444452 | -0.898162 | -3.249335 |
| H | 0.231757  | -2.527560 | -3.513510 |
| H | 0.427067  | -0.966389 | 3.245631  |
| H | -0.232220 | -2.609108 | 3.467589  |
| H | -1.159058 | -1.382674 | 2.569939  |

*(M,M)*-cis-2

|   |           |           |           |
|---|-----------|-----------|-----------|
| C | -2.861338 | -1.489279 | 0.066072  |
| C | -2.665498 | -2.966517 | -0.287861 |



|   |           |           |           |
|---|-----------|-----------|-----------|
| C | -1.408361 | -3.517273 | 0.377166  |
| C | -0.212352 | -2.763840 | -0.137157 |
| C | -0.346993 | -1.430222 | -0.515486 |
| C | -1.569578 | -0.672744 | -0.138414 |
| C | 0.723006  | -0.833683 | -1.285649 |
| C | 1.983687  | -1.495079 | -1.357832 |
| C | 2.121746  | -2.792892 | -0.797466 |
| C | 1.031410  | -3.428886 | -0.269604 |
| C | 3.073730  | -0.868132 | -2.021922 |
| C | 2.914857  | 0.337603  | -2.657008 |
| C | 1.639110  | 0.945709  | -2.684281 |
| C | 0.579803  | 0.375970  | -2.020560 |
| C | -1.569578 | 0.672744  | 0.138414  |
| H | -3.659694 | -1.094026 | -0.578405 |
| C | -0.346994 | 1.430222  | 0.515486  |
| C | -0.212353 | 2.763840  | 0.137157  |
| C | -1.408362 | 3.517273  | -0.377166 |
| C | -2.665498 | 2.966517  | 0.287862  |
| C | -2.861339 | 1.489278  | -0.066072 |
| C | 1.031409  | 3.428886  | 0.269604  |
| C | 2.121746  | 2.792892  | 0.797466  |
| C | 1.983686  | 1.495079  | 1.357832  |
| C | 0.723006  | 0.833683  | 1.285649  |
| C | -3.352821 | -1.385748 | 1.522496  |
| C | 0.579803  | -0.375970 | 2.020560  |
| C | 1.639110  | -0.945708 | 2.684281  |
| C | 2.914857  | -0.337602 | 2.657008  |
| C | 3.073730  | 0.868132  | 2.021922  |
| H | -3.659694 | 1.094025  | 0.578405  |
| C | -3.352822 | 1.385747  | -1.522496 |
| H | -3.554778 | -3.536399 | 0.023204  |
| H | -2.568603 | -3.088147 | -1.378836 |
| H | -1.283817 | -4.588087 | 0.155871  |
| H | -1.486531 | -3.443064 | 1.475788  |
| H | 3.091774  | -3.293379 | -0.847073 |
| H | 1.114679  | -4.459902 | 0.084960  |
| H | 4.040753  | -1.377629 | -2.031071 |
| H | 3.758358  | 0.811007  | -3.164409 |
| H | 1.491623  | 1.875295  | -3.238572 |
| H | -0.398425 | 0.850558  | -2.069219 |
| H | -1.486532 | 3.443063  | -1.475788 |
| H | -1.283818 | 4.588087  | -0.155871 |
| H | -3.554779 | 3.536399  | -0.023204 |
| H | -2.568604 | 3.088146  | 1.378836  |
| H | 1.114678  | 4.459903  | -0.084959 |
| H | 3.091773  | 3.293379  | 0.847073  |
| H | -0.398424 | -0.850558 | 2.069220  |
| H | 1.491623  | -1.875295 | 3.238572  |
| H | 3.758358  | -0.811006 | 3.164408  |
| H | 4.040753  | 1.377629  | 2.031071  |
| H | -3.502022 | 0.349148  | -1.848776 |
| H | -2.634935 | 1.835354  | -2.224814 |
| H | -4.310812 | 1.915937  | -1.642166 |
| H | -2.634935 | -1.835355 | 2.224814  |
| H | -4.310812 | -1.915938 | 1.642166  |
| H | -3.502022 | -0.349149 | 1.848776  |
| C | 2.105119  | -1.830540 | 1.060591  |
| C | 3.284297  | -2.204461 | 0.176643  |
| C | 4.037429  | -0.936594 | -0.171689 |
| C | 3.174656  | 0.308601  | -0.243272 |
| C | 1.773747  | 0.344373  | -0.158229 |

TS<sub>2</sub>

|   |           |           |           |
|---|-----------|-----------|-----------|
| C | 1.115198  | -0.970041 | 0.271860  |
| C | 1.160714  | 1.649028  | -0.421750 |
| C | 1.966830  | 2.834344  | -0.431464 |
| C | 3.379252  | 2.729802  | -0.376385 |
| C | 3.949422  | 1.496068  | -0.363523 |
| C | 1.376261  | 4.118260  | -0.575482 |
| C | 0.029382  | 4.266235  | -0.790526 |
| C | -0.758497 | 3.106237  | -0.917164 |
| C | -0.204178 | 1.858341  | -0.746269 |
| C | -0.123526 | -1.512572 | 0.080359  |
| H | 1.599404  | -2.741797 | 1.353995  |
| C | -1.401752 | -0.857281 | -0.334654 |
| C | -1.929112 | -1.235265 | -1.555540 |
| C | -1.095081 | -2.199042 | -2.350655 |
| C | -0.661893 | -3.378604 | -1.454227 |
| C | -0.527202 | -3.021894 | 0.054237  |
| C | -3.196474 | -0.757601 | -1.966715 |
| C | -3.935843 | 0.051090  | -1.140830 |
| C | -3.457165 | 0.400252  | 0.152266  |
| C | -2.179378 | -0.070828 | 0.576032  |
| C | 2.511134  | -1.171456 | 2.386993  |
| C | -1.712988 | 0.295609  | 1.868112  |
| C | -2.473804 | 1.086741  | 2.694346  |
| C | -3.739890 | 1.557911  | 2.271764  |
| C | -4.218450 | 1.220242  | 1.030014  |
| H | -1.545122 | -3.034383 | 0.473276  |
| C | 0.187919  | -4.176482 | 0.758585  |
| H | 3.949053  | -2.927057 | 0.676839  |
| H | 2.899760  | -2.697052 | -0.730808 |
| H | 4.571081  | -1.037696 | -1.131240 |
| H | 4.821740  | -0.752656 | 0.581083  |
| H | 3.987895  | 3.637101  | -0.396436 |
| H | 5.037657  | 1.395819  | -0.395543 |
| H | 2.033222  | 4.991275  | -0.539998 |
| H | -0.415049 | 5.257170  | -0.905644 |
| H | -1.818354 | 3.185933  | -1.168928 |
| H | -0.834132 | 1.004389  | -0.927738 |
| H | -0.197485 | -1.673452 | -2.714881 |
| H | -1.633577 | -2.559805 | -3.238499 |
| H | 0.304314  | -3.769398 | -1.812036 |
| H | -1.390090 | -4.200403 | -1.543802 |
| H | -3.584158 | -1.043554 | -2.947882 |
| H | -4.911658 | 0.425769  | -1.460411 |
| H | -0.730177 | -0.051077 | 2.190647  |
| H | -2.097480 | 1.360540  | 3.682593  |
| H | -4.333297 | 2.190860  | 2.935367  |
| H | -5.194689 | 1.580809  | 0.695183  |
| H | 0.242625  | -4.041952 | 1.848316  |
| H | 1.197823  | -4.371572 | 0.370342  |
| H | -0.401426 | -5.090377 | 0.579811  |
| H | 3.028681  | -0.209431 | 2.265007  |
| H | 3.175818  | -1.844077 | 2.952999  |
| H | 1.620864  | -0.986761 | 3.007818  |

(*M,P*)-*cis*-2

|   |           |           |           |
|---|-----------|-----------|-----------|
| C | 2.210500  | -2.094248 | -0.483755 |
| C | 2.375141  | -2.733886 | 0.929104  |
| C | 1.744623  | -1.905685 | 2.062181  |
| C | 0.285131  | -1.723267 | 1.738728  |
| C | -0.005630 | -1.380621 | 0.428841  |
| C | 1.172756  | -0.979123 | -0.394228 |
| C | -1.335525 | -1.538403 | -0.066869 |
| C | -2.386935 | -1.801780 | 0.860744  |

|   |           |           |           |
|---|-----------|-----------|-----------|
| C | -2.069750 | -1.985012 | 2.233389  |
| C | -0.761347 | -2.000665 | 2.650108  |
| C | -3.717371 | -1.941754 | 0.375332  |
| C | -3.984344 | -1.907089 | -0.970458 |
| C | -2.926806 | -1.740608 | -1.898196 |
| C | -1.641193 | -1.550484 | -1.456439 |
| C | 1.417305  | 0.308793  | -0.727890 |
| H | 3.171643  | -1.634952 | -0.736013 |
| C | 0.742221  | 1.468546  | -0.054951 |
| C | 1.585971  | 2.129354  | 0.831632  |
| C | 3.017798  | 1.662395  | 0.949463  |
| C | 3.669092  | 1.339287  | -0.412879 |
| C | 2.639489  | 0.864001  | -1.464684 |
| C | 1.095130  | 3.203342  | 1.613679  |
| C | -0.205084 | 3.623354  | 1.496663  |
| C | -1.061512 | 3.041736  | 0.525961  |
| C | -0.569911 | 1.979214  | -0.292131 |
| C | 1.882778  | -3.146300 | -1.542151 |
| C | -1.389607 | 1.520158  | -1.357735 |
| C | -2.651979 | 2.021983  | -1.554360 |
| C | -3.166879 | 3.019942  | -0.692065 |
| C | -2.383578 | 3.523439  | 0.316197  |
| H | 2.245098  | 1.774978  | -1.943871 |
| C | 3.262567  | 0.060669  | -2.605385 |
| H | 1.893956  | -3.725326 | 0.937485  |
| H | 3.444755  | -2.901989 | 1.128194  |
| H | 2.254253  | -0.933375 | 2.150172  |
| H | 1.867613  | -2.418550 | 3.027458  |
| H | -2.879314 | -2.173407 | 2.943051  |
| H | -0.518116 | -2.224659 | 3.692150  |
| H | -4.522061 | -2.108080 | 1.096279  |
| H | -5.007606 | -2.034101 | -1.331177 |
| H | -3.137876 | -1.763223 | -2.969897 |
| H | -0.825675 | -1.427564 | -2.172296 |
| H | 3.032064  | 0.750507  | 1.566642  |
| H | 3.614981  | 2.406572  | 1.495960  |
| H | 4.433103  | 0.558061  | -0.266275 |
| H | 4.198520  | 2.223080  | -0.801721 |
| H | 1.765948  | 3.689448  | 2.327169  |
| H | -0.585343 | 4.435082  | 2.121917  |
| H | -0.986993 | 0.770690  | -2.036029 |
| H | -3.262391 | 1.650755  | -2.380558 |
| H | -4.178381 | 3.402606  | -0.845825 |
| H | -2.759319 | 4.317726  | 0.966500  |
| H | 2.489123  | -0.329232 | -3.284174 |
| H | 3.879072  | -0.785070 | -2.272001 |
| H | 3.918703  | 0.717621  | -3.197921 |
| H | 0.897024  | -3.601583 | -1.353712 |
| H | 2.631950  | -3.954006 | -1.538262 |
| H | 1.866974  | -2.705731 | -2.550316 |

TS<sub>3</sub>

|   |          |           |           |
|---|----------|-----------|-----------|
| C | 0.731695 | -2.906075 | -0.248290 |
| C | 1.075410 | -3.109878 | -1.752471 |
| C | 1.515906 | -1.828434 | -2.491030 |
| C | 2.129341 | -0.834801 | -1.547027 |
| C | 1.435182 | -0.588562 | -0.374411 |
| C | 0.263912 | -1.452505 | -0.080164 |
| C | 1.967918 | 0.315787  | 0.603653  |
| C | 3.187412 | 0.996765  | 0.315226  |
| C | 3.851808 | 0.745102  | -0.916101 |
| C | 3.339178 | -0.152521 | -1.818493 |
| C | 3.706414 | 1.924150  | 1.260594  |

|   |           |           |           |
|---|-----------|-----------|-----------|
| C | 3.050262  | 2.169938  | 2.441025  |
| C | 1.843964  | 1.489690  | 2.731876  |
| C | 1.318746  | 0.587705  | 1.839073  |
| C | -1.025820 | -1.138542 | 0.242590  |
| H | -0.100461 | -3.580527 | -0.043985 |
| C | -1.890996 | 0.069577  | -0.096171 |
| C | -3.276094 | -0.159980 | -0.062190 |
| C | -3.938078 | -1.527178 | -0.023702 |
| C | -2.991660 | -2.685456 | 0.253287  |
| C | -1.857399 | -2.121328 | 1.097978  |
| C | -4.206368 | 0.914974  | -0.062501 |
| C | -3.802613 | 2.214402  | -0.094126 |
| C | -2.432294 | 2.504776  | -0.313446 |
| C | -1.484082 | 1.436144  | -0.424208 |
| C | 1.912309  | -3.303638 | 0.644900  |
| C | -0.215951 | 1.809381  | -0.942919 |
| C | 0.141147  | 3.117176  | -1.179638 |
| C | -0.760136 | 4.167841  | -0.919294 |
| C | -2.032892 | 3.853352  | -0.515269 |
| H | -2.332862 | -1.437255 | 1.822724  |
| C | -1.184202 | -3.148665 | 2.011444  |
| H | 1.873693  | -3.865229 | -1.820445 |
| H | 0.200665  | -3.530803 | -2.269449 |
| H | 0.628750  | -1.360203 | -2.949622 |
| H | 2.203299  | -2.068447 | -3.314760 |
| H | 4.783819  | 1.274363  | -1.130084 |
| H | 3.861410  | -0.346080 | -2.759133 |
| H | 4.640371  | 2.442239  | 1.027443  |
| H | 3.455333  | 2.888303  | 3.157289  |
| H | 1.325532  | 1.686018  | 3.673010  |
| H | 0.382606  | 0.077606  | 2.067166  |
| H | -4.483358 | -1.662846 | -0.972612 |
| H | -4.711257 | -1.502237 | 0.762070  |
| H | -2.582040 | -3.115008 | -0.675641 |
| H | -3.522260 | -3.497082 | 0.775558  |
| H | -5.270371 | 0.675045  | 0.012960  |
| H | -4.522369 | 3.033107  | -0.019637 |
| H | 0.488396  | 1.041465  | -1.223643 |
| H | 1.130222  | 3.330746  | -1.590916 |
| H | -0.466808 | 5.206953  | -1.083603 |
| H | -2.782128 | 4.637295  | -0.376995 |
| H | -0.283148 | -2.740257 | 2.489938  |
| H | -0.916870 | -4.096636 | 1.526706  |
| H | -1.893813 | -3.401859 | 2.814752  |
| H | 2.833802  | -2.773077 | 0.362080  |
| H | 2.109765  | -4.383366 | 0.552650  |
| H | 1.717964  | -3.087404 | 1.704999  |

(*P,P*)-*cis*-2

|   |           |           |           |
|---|-----------|-----------|-----------|
| C | -2.871044 | 1.480427  | -0.217809 |
| C | -2.706796 | 2.878322  | 0.425744  |
| C | -1.506975 | 2.940863  | 1.373929  |
| C | -0.269383 | 2.588163  | 0.594017  |
| C | -0.341116 | 1.483551  | -0.241876 |
| C | -1.580327 | 0.666056  | -0.127932 |
| C | 0.759630  | 1.169473  | -1.102048 |
| C | 1.974739  | 1.902316  | -0.965147 |
| C | 2.032306  | 2.983923  | -0.045896 |
| C | 0.926589  | 3.339079  | 0.684057  |
| C | 3.096063  | 1.546161  | -1.765350 |
| C | 3.009575  | 0.534948  | -2.688986 |
| C | 1.783895  | -0.149187 | -2.873428 |
| C | 0.690977  | 0.161831  | -2.103153 |

|   |           |           |           |
|---|-----------|-----------|-----------|
| C | -1.580325 | -0.666061 | 0.127934  |
| H | -3.647986 | 0.952344  | 0.351771  |
| C | -0.341111 | -1.483552 | 0.241877  |
| C | -0.269372 | -2.588161 | -0.594019 |
| C | -1.506964 | -2.940865 | -1.373932 |
| C | -2.706783 | -2.878332 | -0.425743 |
| C | -2.871039 | -1.480437 | 0.217807  |
| C | 0.926603  | -3.339073 | -0.684060 |
| C | 2.032317  | -2.983914 | 0.045894  |
| C | 1.974746  | -1.902309 | 0.965148  |
| C | 0.759633  | -1.169473 | 1.102051  |
| C | -3.336935 | 1.589825  | -1.672588 |
| C | 0.690975  | -0.161835 | 2.103159  |
| C | 1.783891  | 0.149188  | 2.873435  |
| C | 3.009576  | -0.534938 | 2.688988  |
| C | 3.096068  | -1.546149 | 1.765350  |
| H | -3.647980 | -0.952358 | -0.351780 |
| C | -3.336940 | -1.589833 | 1.672582  |
| H | -2.555902 | 3.635442  | -0.361258 |
| H | -3.634099 | 3.152538  | 0.951816  |
| H | -1.653951 | 2.226590  | 2.204974  |
| H | -1.412050 | 3.939164  | 1.825994  |
| H | 2.966962  | 3.541148  | 0.055870  |
| H | 0.968380  | 4.192346  | 1.366306  |
| H | 4.029919  | 2.098991  | -1.634708 |
| H | 3.877633  | 0.268150  | -3.296173 |
| H | 1.708215  | -0.929014 | -3.634496 |
| H | -0.253740 | -0.358577 | -2.258436 |
| H | -1.412035 | -3.939163 | -1.826001 |
| H | -1.653944 | -2.226588 | -2.204973 |
| H | -2.555880 | -3.635450 | 0.361259  |
| H | -3.634085 | -3.152557 | -0.951812 |
| H | 0.968397  | -4.192338 | -1.366311 |
| H | 2.966976  | -3.541135 | -0.055873 |
| H | -0.253746 | 0.358565  | 2.258446  |
| H | 1.708208  | 0.929012  | 3.634505  |
| H | 3.877634  | -0.268137 | 3.296174  |
| H | 4.029928  | -2.098973 | 1.634705  |
| H | -3.533388 | -0.598289 | 2.108709  |
| H | -2.566321 | -2.079579 | 2.289449  |
| H | -4.261150 | -2.184796 | 1.749381  |
| H | -2.566314 | 2.079575  | -2.289448 |
| H | -4.261147 | 2.184784  | -1.749391 |
| H | -3.533377 | 0.598281  | -2.108719 |

(*P,P*)-*cis*-2\*

|   |           |           |           |
|---|-----------|-----------|-----------|
| C | 2.668146  | 1.896179  | 0.205027  |
| C | 2.284082  | 3.366719  | -0.061018 |
| C | 1.006945  | 3.482997  | -0.875915 |
| C | -0.103359 | 2.769960  | -0.160419 |
| C | 0.195913  | 1.506282  | 0.430280  |
| C | 1.476529  | 0.941021  | 0.135042  |
| C | -0.876958 | 0.802580  | 1.124604  |
| C | -2.226258 | 1.250382  | 0.960032  |
| C | -2.475209 | 2.440751  | 0.251862  |
| C | -1.417986 | 3.209562  | -0.240018 |
| C | -3.281962 | 0.478425  | 1.525148  |
| C | -3.015920 | -0.636915 | 2.285317  |
| C | -1.680939 | -1.017372 | 2.527382  |
| C | -0.637407 | -0.291895 | 1.975424  |
| C | 1.681317  | -0.433843 | -0.201782 |
| H | 3.406269  | 1.593699  | -0.554956 |
| C | 0.637728  | -1.348081 | -0.536755 |

|   |           |           |           |
|---|-----------|-----------|-----------|
| C | 0.767103  | -2.727396 | -0.130996 |
| C | 2.116284  | -3.322131 | 0.168765  |
| C | 3.106360  | -2.287503 | 0.685113  |
| C | 3.087636  | -1.024977 | -0.183211 |
| C | -0.381063 | -3.473865 | 0.086150  |
| C | -1.661877 | -2.969454 | -0.175058 |
| C | -1.813669 | -1.745672 | -0.849226 |
| C | -0.650061 | -0.955037 | -1.119264 |
| C | 3.334230  | 1.814738  | 1.592197  |
| C | -0.786524 | 0.146954  | -1.978537 |
| C | -2.031006 | 0.551470  | -2.445988 |
| C | -3.188958 | -0.161673 | -2.089740 |
| C | -3.082396 | -1.289156 | -1.305678 |
| H | 3.783010  | -0.315595 | 0.275287  |
| C | 3.588753  | -1.273894 | -1.611732 |
| H | 2.120867  | 3.883409  | 0.898818  |
| H | 3.123258  | 3.879715  | -0.555402 |
| H | 1.154929  | 3.021515  | -1.871127 |
| H | 0.739592  | 4.535640  | -1.052170 |
| H | -3.506236 | 2.779417  | 0.124463  |
| H | -1.632009 | 4.142212  | -0.769136 |
| H | -4.312306 | 0.802818  | 1.358992  |
| H | -3.835280 | -1.219887 | 2.711871  |
| H | -1.464363 | -1.876279 | 3.165909  |
| H | 0.392882  | -0.589873 | 2.174053  |
| H | 2.513834  | -3.768400 | -0.761011 |
| H | 2.012428  | -4.153385 | 0.882298  |
| H | 4.122159  | -2.713104 | 0.716582  |
| H | 2.845319  | -2.007216 | 1.719792  |
| H | -0.280337 | -4.476523 | 0.511092  |
| H | -2.545967 | -3.569760 | 0.052729  |
| H | 0.105179  | 0.706403  | -2.265859 |
| H | -2.104204 | 1.421961  | -3.101156 |
| H | -4.166749 | 0.172919  | -2.443757 |
| H | -3.969412 | -1.874642 | -1.050866 |
| H | 3.640382  | -0.329317 | -2.175309 |
| H | 2.921990  | -1.946952 | -2.171475 |
| H | 4.597991  | -1.716838 | -1.601450 |
| H | 2.613029  | 2.113989  | 2.368517  |
| H | 4.194728  | 2.501542  | 1.644304  |
| H | 3.692181  | 0.807595  | 1.846929  |

*(M,M)-trans-1*

|   |           |           |           |
|---|-----------|-----------|-----------|
| C | 0.341625  | -1.955936 | -0.786588 |
| C | -0.705416 | -3.028499 | -1.141868 |
| C | -1.813071 | -2.443894 | -2.018273 |
| C | -2.561568 | -1.459548 | -1.166733 |
| C | -1.818771 | -0.639931 | -0.324752 |
| C | -0.338501 | -0.594255 | -0.495486 |
| C | -2.506799 | 0.107376  | 0.698411  |
| C | -3.934702 | 0.144062  | 0.692361  |
| C | -4.647697 | -0.607233 | -0.278195 |
| C | -3.974986 | -1.421093 | -1.152348 |
| C | -4.625607 | 0.904020  | 1.677324  |
| C | -3.944513 | 1.570523  | 2.663912  |
| C | -2.532853 | 1.490623  | 2.712354  |
| C | -1.839566 | 0.786419  | 1.757823  |
| C | 0.338499  | 0.594785  | -0.494871 |
| H | 0.869649  | -2.301314 | 0.115737  |
| C | 1.818753  | 0.640344  | -0.324037 |
| C | 2.561548  | 1.460967  | -1.165045 |
| C | 1.813081  | 2.446324  | -2.015443 |
| C | 0.705275  | 3.029791  | -1.138470 |

|   |           |           |           |
|---|-----------|-----------|-----------|
| C | -0.341705 | 1.956713  | -0.784626 |
| C | 3.974966  | 1.422474  | -1.150724 |
| C | 4.647682  | 0.607568  | -0.277551 |
| C | 3.934693  | -0.144835 | 0.692152  |
| C | 2.506792  | -0.108124 | 0.698276  |
| C | 1.366944  | -1.888554 | -1.928582 |
| C | 1.839573  | -0.788339 | 1.756943  |
| C | 2.532869  | -1.493648 | 2.710653  |
| C | 3.944524  | -1.573544 | 2.662073  |
| C | 4.625608  | -0.905935 | 1.676226  |
| H | -0.870013 | 2.301011  | 0.117942  |
| C | -1.366723 | 1.890442  | -1.926955 |
| H | -0.201520 | -3.865901 | -1.647382 |
| H | -1.167719 | -3.440368 | -0.230575 |
| H | -2.495072 | -3.226243 | -2.382391 |
| H | -1.378015 | -1.959010 | -2.909462 |
| H | -5.739640 | -0.562582 | -0.286580 |
| H | -4.528387 | -2.049312 | -1.855273 |
| H | -5.717735 | 0.934065  | 1.640081  |
| H | -4.486017 | 2.144801  | 3.418803  |
| H | -1.988776 | 1.988854  | 3.517950  |
| H | -0.753118 | 0.734983  | 1.818242  |
| H | 1.378174  | 1.962520  | -2.907293 |
| H | 2.495086  | 3.229160  | -2.378506 |
| H | 0.201369  | 3.867757  | -1.643041 |
| H | 1.167425  | 3.440598  | -0.226619 |
| H | 4.528363  | 2.051515  | -1.852917 |
| H | 5.739623  | 0.562897  | -0.286022 |
| H | 0.753131  | -0.736920 | 1.817474  |
| H | 1.988804  | -1.992768 | 3.515707  |
| H | 4.486032  | -2.148700 | 3.416293  |
| H | 5.717734  | -0.935963 | 1.638919  |
| H | -0.899320 | 1.538433  | -2.860735 |
| H | -1.781345 | 2.892874  | -2.112804 |
| H | -2.212533 | 1.228647  | -1.713556 |
| H | 0.899841  | -1.535421 | -2.862089 |
| H | 1.781440  | -2.890847 | -2.115448 |
| H | 2.212818  | -1.227148 | -1.714232 |

TS<sub>5</sub>

|   |           |           |           |
|---|-----------|-----------|-----------|
| C | -0.336972 | -0.908952 | 1.472272  |
| C | -0.409365 | -2.429861 | 1.284329  |
| C | 0.485932  | -2.864694 | 0.132685  |
| C | 1.742650  | -2.037704 | 0.043413  |
| C | 1.705512  | -0.630556 | 0.021572  |
| C | 0.294667  | -0.102426 | 0.310901  |
| C | 2.985655  | 0.037021  | -0.209103 |
| C | 4.199678  | -0.734080 | -0.238439 |
| C | 4.158695  | -2.142508 | -0.124149 |
| C | 2.953236  | -2.768181 | -0.024545 |
| C | 5.466293  | -0.109069 | -0.413077 |
| C | 5.582862  | 1.242838  | -0.595729 |
| C | 4.403432  | 2.013591  | -0.626218 |
| C | 3.173406  | 1.428784  | -0.442004 |
| C | -0.457638 | 0.954275  | -0.159862 |
| H | -1.349245 | -0.527636 | 1.633916  |
| C | -1.953397 | 0.893272  | -0.092188 |
| C | -2.715765 | 2.022930  | 0.202156  |
| C | -2.123856 | 3.398168  | 0.045810  |
| C | -0.984802 | 3.322665  | -0.964315 |
| C | 0.095833  | 2.342853  | -0.494414 |
| C | -4.091810 | 1.894587  | 0.526624  |
| C | -4.732573 | 0.687403  | 0.469554  |

|   |           |           |           |
|---|-----------|-----------|-----------|
| C | -4.061461 | -0.432997 | -0.090916 |
| C | -2.682782 | -0.311650 | -0.437224 |
| C | 0.450627  | -0.538939 | 2.741716  |
| C | -2.119256 | -1.344885 | -1.232135 |
| C | -2.834874 | -2.469445 | -1.570333 |
| C | -4.158454 | -2.641074 | -1.107242 |
| C | -4.759465 | -1.634161 | -0.392007 |
| H | 0.833570  | 2.267641  | -1.304620 |
| C | 0.739525  | 2.917665  | 0.787804  |
| H | -0.089872 | -2.932407 | 2.210879  |
| H | -1.444248 | -2.747214 | 1.091943  |
| H | -0.059269 | -2.763889 | -0.815349 |
| H | 0.745518  | -3.928980 | 0.219432  |
| H | 5.091936  | -2.710314 | -0.142602 |
| H | 2.903900  | -3.858543 | 0.023458  |
| H | 6.353697  | -0.747231 | -0.410582 |
| H | 6.559832  | 1.710891  | -0.732756 |
| H | 4.457634  | 3.089881  | -0.805939 |
| H | 2.317860  | 2.073615  | -0.507233 |
| H | -1.781576 | 3.823149  | 1.003309  |
| H | -2.913600 | 4.075720  | -0.313942 |
| H | -0.529002 | 4.313752  | -1.113780 |
| H | -1.390971 | 3.002459  | -1.937332 |
| H | -4.637828 | 2.791745  | 0.831612  |
| H | -5.782306 | 0.593781  | 0.758336  |
| H | -1.106441 | -1.213115 | -1.609066 |
| H | -2.377769 | -3.232117 | -2.205239 |
| H | -4.710724 | -3.551301 | -1.351391 |
| H | -5.802650 | -1.724564 | -0.078177 |
| H | -0.024213 | 3.084714  | 1.560043  |
| H | 1.233421  | 3.883295  | 0.590614  |
| H | 1.474589  | 2.239237  | 1.234570  |
| H | 1.483922  | -0.917598 | 2.709961  |
| H | -0.040521 | -0.975728 | 3.625747  |
| H | 0.491160  | 0.551539  | 2.884573  |

(*M,P*)-*trans*-1

|   |           |           |           |
|---|-----------|-----------|-----------|
| C | 0.261140  | 1.368671  | 1.315475  |
| C | 0.032687  | 2.858536  | 0.920766  |
| C | -0.744821 | 3.029336  | -0.397729 |
| C | -1.947403 | 2.124488  | -0.393987 |
| C | -1.721934 | 0.802588  | -0.045282 |
| C | -0.296900 | 0.457761  | 0.224378  |
| C | -2.826881 | -0.075303 | 0.177062  |
| C | -4.145915 | 0.386710  | -0.109076 |
| C | -4.331394 | 1.724294  | -0.550408 |
| C | -3.261959 | 2.577957  | -0.659875 |
| C | -5.244016 | -0.500025 | 0.076373  |
| C | -5.052960 | -1.771128 | 0.557797  |
| C | -3.748744 | -2.212749 | 0.891214  |
| C | -2.668435 | -1.386377 | 0.705533  |
| C | 0.445343  | -0.452200 | -0.440622 |
| H | 1.338412  | 1.194310  | 1.407986  |
| C | 1.853688  | -0.796531 | -0.063755 |
| C | 2.054071  | -2.125138 | 0.280105  |
| C | 0.852175  | -3.034813 | 0.242604  |
| C | 0.030205  | -2.850622 | -1.050567 |
| C | 0.042899  | -1.391440 | -1.578984 |
| C | 3.346770  | -2.583457 | 0.633134  |
| C | 4.422054  | -1.731383 | 0.617234  |
| C | 4.268119  | -0.383665 | 0.196036  |
| C | 2.973453  | 0.086884  | -0.178120 |
| C | -0.365270 | 1.033099  | 2.672904  |



|   |           |           |           |
|---|-----------|-----------|-----------|
| C | 2.858996  | 1.413440  | -0.682559 |
| C | 3.952894  | 2.238742  | -0.768782 |
| C | 5.228432  | 1.783947  | -0.353444 |
| C | 5.379762  | 0.501352  | 0.110588  |
| H | 0.904133  | -1.320985 | -2.265193 |
| C | -1.180326 | -1.065857 | -2.430327 |
| H | -0.530233 | 3.365095  | 1.720705  |
| H | 1.000516  | 3.376123  | 0.842696  |
| H | -0.091581 | 2.768906  | -1.248156 |
| H | -1.039888 | 4.079580  | -0.537081 |
| H | -5.343458 | 2.072953  | -0.771108 |
| H | -3.417693 | 3.618706  | -0.955864 |
| H | -6.249994 | -0.144201 | -0.161267 |
| H | -5.904948 | -2.439809 | 0.699351  |
| H | -3.604827 | -3.213949 | 1.303995  |
| H | -1.665487 | -1.723042 | 0.967168  |
| H | 0.214359  | -2.797982 | 1.111286  |
| H | 1.154360  | -4.085197 | 0.362744  |
| H | -1.008936 | -3.162069 | -0.863227 |
| H | 0.417923  | -3.517199 | -1.836381 |
| H | 3.480140  | -3.629498 | 0.921320  |
| H | 5.415392  | -2.086748 | 0.902619  |
| H | 1.881354  | 1.766466  | -1.011828 |
| H | 3.840963  | 3.250331  | -1.165870 |
| H | 6.090119  | 2.452248  | -0.416413 |
| H | 6.364008  | 0.134998  | 0.414114  |
| H | -1.160146 | -1.686050 | -3.340724 |
| H | -1.183837 | -0.012077 | -2.745753 |
| H | -2.128566 | -1.270339 | -1.919191 |
| H | -1.456909 | 1.180148  | 2.664124  |
| H | 0.053934  | 1.678907  | 3.460507  |
| H | -0.163478 | -0.012326 | 2.953313  |

TS<sub>6</sub>

|   |           |           |           |
|---|-----------|-----------|-----------|
| C | 0.092124  | 2.168992  | 0.229686  |
| C | -0.567654 | 3.239441  | -0.696118 |
| C | -1.546742 | 2.666260  | -1.726367 |
| C | -2.454013 | 1.688698  | -1.039847 |
| C | -1.832472 | 0.725660  | -0.263856 |
| C | -0.343732 | 0.764154  | -0.177890 |
| C | -2.620416 | -0.183173 | 0.516978  |
| C | -4.042786 | -0.140842 | 0.391751  |
| C | -4.637572 | 0.814916  | -0.474937 |
| C | -3.862534 | 1.720615  | -1.154874 |
| C | -4.837260 | -1.045720 | 1.150280  |
| C | -4.259192 | -1.940116 | 2.015643  |
| C | -2.851866 | -1.962247 | 2.168044  |
| C | -2.057223 | -1.111271 | 1.438970  |
| C | 0.413062  | -0.329593 | -0.494661 |
| H | 1.163861  | 2.258288  | 0.058547  |
| C | 1.849696  | -0.708548 | -0.161732 |
| C | 2.137453  | -2.075547 | -0.311525 |
| C | 1.051592  | -3.122699 | -0.189499 |
| C | -0.225505 | -2.785525 | -0.961754 |
| C | -0.134082 | -1.370074 | -1.515083 |
| C | 3.465022  | -2.532520 | -0.506481 |
| C | 4.521305  | -1.665875 | -0.512114 |
| C | 4.313024  | -0.331792 | -0.080780 |
| C | 2.986017  | 0.119938  | 0.219170  |
| C | -0.224013 | 2.461011  | 1.701097  |
| C | 2.913928  | 1.296049  | 1.018861  |
| C | 4.016423  | 2.064933  | 1.311444  |
| C | 5.291878  | 1.707594  | 0.824782  |

|   |           |           |           |
|---|-----------|-----------|-----------|
| C | 5.431604  | 0.511524  | 0.168430  |
| H | 0.702371  | -1.392168 | -2.236275 |
| C | -1.347585 | -1.054644 | -2.388490 |
| H | -1.113997 | 3.963587  | -0.071844 |
| H | 0.220539  | 3.804828  | -1.215074 |
| H | -0.982993 | 2.150403  | -2.523022 |
| H | -2.116988 | 3.473075  | -2.209575 |
| H | -5.725870 | 0.832337  | -0.574602 |
| H | -4.329103 | 2.470257  | -1.799277 |
| H | -5.923794 | -1.008182 | 1.036174  |
| H | -4.880434 | -2.625101 | 2.596899  |
| H | -2.395151 | -2.659044 | 2.874792  |
| H | -0.974998 | -1.133796 | 1.569229  |
| H | 0.828337  | -3.212029 | 0.886815  |
| H | 1.452588  | -4.101153 | -0.489690 |
| H | -1.116327 | -2.886215 | -0.324404 |
| H | -0.361608 | -3.483424 | -1.802815 |
| H | 3.625533  | -3.596276 | -0.699092 |
| H | 5.532443  | -2.004001 | -0.750652 |
| H | 1.979740  | 1.544955  | 1.503391  |
| H | 3.902242  | 2.941492  | 1.953478  |
| H | 6.160555  | 2.336915  | 1.029643  |
| H | 6.420567  | 0.155813  | -0.132460 |
| H | -1.349665 | -1.773398 | -3.223829 |
| H | -1.296239 | -0.049514 | -2.826435 |
| H | -2.310223 | -1.163234 | -1.873171 |
| H | -1.312224 | 2.471386  | 1.868958  |
| H | 0.171882  | 3.444323  | 2.001123  |
| H | 0.198071  | 1.702274  | 2.378421  |

ωB97X-D/SVP in methanol

(*P,P*)-*trans*-1

|   |           |           |           |
|---|-----------|-----------|-----------|
| C | 0.090314  | -0.485669 | -1.972997 |
| C | -0.467220 | -1.818273 | -2.560828 |
| C | -1.442491 | -2.549007 | -1.621549 |
| C | -2.419668 | -1.580260 | -1.012208 |
| C | -1.884541 | -0.427217 | -0.458676 |
| C | -0.402751 | -0.327136 | -0.541270 |
| C | -2.743174 | 0.582550  | 0.075110  |
| C | -4.150893 | 0.346227  | 0.104254  |
| C | -4.663160 | -0.866831 | -0.432152 |
| C | -3.819651 | -1.795804 | -0.991355 |
| C | -5.008753 | 1.340588  | 0.654656  |
| C | -4.500432 | 2.523252  | 1.134293  |
| C | -3.106405 | 2.772891  | 1.074218  |
| C | -2.252142 | 1.828610  | 0.557693  |
| C | 0.402677  | -0.326623 | 0.541087  |
| H | 1.186779  | -0.545010 | -1.957470 |
| C | 1.884482  | -0.426933 | 0.458814  |
| C | 2.419356  | -1.579549 | 1.013476  |
| C | 1.441937  | -2.547560 | 1.623589  |
| C | 0.466674  | -1.815787 | 2.562075  |
| C | -0.090586 | -0.483667 | 1.972886  |
| C | 3.819307  | -1.795329 | 0.993031  |
| C | 4.663047  | -0.866962 | 0.433175  |
| C | 4.151062  | 0.345754  | -0.104269 |
| C | 2.743374  | 0.582323  | -0.075541 |
| C | -0.309244 | 0.710712  | -2.841917 |
| C | 2.252649  | 1.828143  | -0.559046 |
| C | 3.107151  | 2.771898  | -1.076135 |
| C | 4.501139  | 2.521962  | -1.135852 |
| C | 5.009179  | 1.339562  | -0.655269 |
| H | -1.187063 | -0.542862 | 1.957246  |
| C | 0.309007  | 0.713555  | 2.840626  |
| H | -0.989296 | -1.603771 | -3.506764 |
| H | 0.363671  | -2.495219 | -2.809293 |
| H | -0.868326 | -3.031452 | -0.811302 |
| H | -1.967057 | -3.351944 | -2.159859 |
| H | -5.742069 | -1.041404 | -0.406079 |
| H | -4.224415 | -2.716442 | -1.420738 |
| H | -6.084574 | 1.147260  | 0.683370  |
| H | -5.169684 | 3.279258  | 1.552145  |
| H | -2.710848 | 3.724481  | 1.437932  |
| H | -1.180555 | 2.027613  | 0.501414  |
| H | 1.966295  | -3.350091 | 2.162708  |
| H | 0.867797  | -3.030648 | 0.813709  |
| H | 0.988666  | -1.600465 | 3.507871  |
| H | -0.364350 | -2.492371 | 2.811078  |
| H | 4.223861  | -2.715649 | 1.423292  |
| H | 5.741936  | -1.041713 | 0.407445  |
| H | 1.181099  | 2.027395  | -0.503021 |
| H | 2.711817  | 3.723303  | -1.440574 |
| H | 5.170586  | 3.277548  | -1.554151 |
| H | 6.084972  | 1.146032  | -0.683668 |
| H | -0.083676 | 0.596993  | 3.863285  |
| H | -0.084055 | 1.659091  | 2.438001  |
| H | 1.405061  | 0.805330  | 2.913270  |
| H | -1.405297 | 0.802555  | -2.914502 |
| H | 0.083273  | 0.593029  | -3.864513 |
| H | 0.084002  | 1.656617  | -2.440345 |

*(P,P)*-trans-1\*

|   |           |           |           |
|---|-----------|-----------|-----------|
| C | -1.561921 | -0.398736 | -2.062379 |
| C | -1.784461 | -1.706461 | -2.823410 |
| C | -2.080143 | -2.838768 | -1.858271 |
| C | -1.023582 | -2.959219 | -0.793351 |
| C | -0.250137 | -1.823764 | -0.385368 |
| C | -0.455279 | -0.573570 | -1.020445 |
| C | 0.701285  | -2.027177 | 0.720815  |
| C | 0.906729  | -3.341953 | 1.248549  |
| C | 0.151080  | -4.431355 | 0.749636  |
| C | -0.798749 | -4.220696 | -0.228158 |
| C | 1.848145  | -3.548473 | 2.295811  |
| C | 2.543081  | -2.498968 | 2.847908  |
| C | 2.307144  | -1.192790 | 2.373209  |
| C | 1.412532  | -0.973504 | 1.344687  |
| C | 0.455242  | 0.573601  | -1.020379 |
| H | -1.205329 | 0.350760  | -2.787703 |
| C | 0.250096  | 1.823815  | -0.385401 |
| C | 1.023699  | 2.959228  | -0.793237 |
| C | 2.080307  | 2.838670  | -1.858121 |
| C | 1.784455  | 1.706449  | -2.823327 |
| C | 1.561829  | 0.398676  | -2.062389 |
| C | 0.798899  | 4.220699  | -0.228035 |
| C | -0.151000 | 4.431475  | 0.749691  |
| C | -0.906735 | 3.342099  | 1.248528  |
| C | -0.701336 | 2.027310  | 0.720775  |
| C | -2.865438 | 0.158295  | -1.469620 |
| C | -1.412650 | 0.973663  | 1.344617  |
| C | -2.307287 | 1.192912  | 2.373122  |
| C | -2.543112 | 2.499087  | 2.847892  |
| C | -1.848118 | 3.548580  | 2.295840  |
| H | 1.205139  | -0.350710 | -2.787793 |
| C | 2.865329  | -0.158547 | -1.469792 |
| H | -2.606746 | -1.583083 | -3.545534 |
| H | -0.876937 | -1.945274 | -3.403226 |
| H | -2.174228 | -3.796470 | -2.392332 |
| H | -3.059845 | -2.668787 | -1.374494 |
| H | 0.317295  | -5.430333 | 1.160729  |
| H | -1.391017 | -5.064724 | -0.593473 |
| H | 1.995957  | -4.567104 | 2.664872  |
| H | 3.259490  | -2.670926 | 3.654913  |
| H | 2.828577  | -0.343871 | 2.821668  |
| H | 1.263371  | 0.048974  | 1.008493  |
| H | 3.060009  | 2.668528  | -1.374399 |
| H | 2.174519  | 3.796370  | -2.392170 |
| H | 2.606681  | 1.583046  | -3.545516 |
| H | 0.876919  | 1.945398  | -3.403072 |
| H | 1.391294  | 5.064676  | -0.593278 |
| H | -0.317123 | 5.430450  | 1.160830  |
| H | -1.263520 | -0.048820 | 1.008418  |
| H | -2.828737 | 0.343994  | 2.821564  |
| H | -3.259482 | 2.671053  | 3.654933  |
| H | -1.995867 | 4.567193  | 2.664983  |
| H | 2.717155  | -1.166368 | -1.058484 |
| H | 3.258399  | 0.477764  | -0.662816 |
| H | 3.631446  | -0.225510 | -2.259245 |
| H | -3.258359 | -0.478091 | -0.662629 |
| H | -3.631613 | 0.225163  | -2.259018 |
| H | -2.717356 | 1.166124  | -1.058305 |

*(M,M)*-cis-2

|   |           |          |           |
|---|-----------|----------|-----------|
| C | -2.868596 | 1.491618 | -0.046889 |
| C | -2.670089 | 2.962934 | 0.328365  |

|   |           |           |           |
|---|-----------|-----------|-----------|
| C | -1.416295 | 3.524655  | -0.333112 |
| C | -0.218897 | 2.762021  | 0.160927  |
| C | -0.353897 | 1.423991  | 0.525861  |
| C | -1.578252 | 0.671343  | 0.145626  |
| C | 0.721790  | 0.816933  | 1.279919  |
| C | 1.988903  | 1.468996  | 1.337824  |
| C | 2.127545  | 2.772416  | 0.787632  |
| C | 1.031130  | 3.419728  | 0.283590  |
| C | 3.086379  | 0.827789  | 1.978148  |
| C | 2.928564  | -0.385070 | 2.602306  |
| C | 1.647383  | -0.984100 | 2.645919  |
| C | 0.580005  | -0.399354 | 2.006282  |
| C | -1.578336 | -0.671154 | -0.145750 |
| H | -3.667321 | 1.087555  | 0.591327  |
| C | -0.354082 | -1.423956 | -0.526005 |
| C | -0.219263 | -2.762030 | -0.161134 |
| C | -1.416757 | -3.524627 | 0.332763  |
| C | -2.670549 | -2.962569 | -0.328416 |
| C | -2.868723 | -1.491276 | 0.047057  |
| C | 1.030721  | -3.419851 | -0.283676 |
| C | 2.127258  | -2.772631 | -0.787561 |
| C | 1.988794  | -1.469193 | -1.337758 |
| C | 0.721741  | -0.817006 | -1.279976 |
| C | -3.356173 | 1.408135  | -1.505474 |
| C | 0.580144  | 0.399281  | -2.006368 |
| C | 1.647642  | 0.983922  | -2.645903 |
| C | 2.928762  | 0.384779  | -2.602153 |
| C | 3.086397  | -0.828093 | -1.977971 |
| H | -3.667602 | -1.087036 | -0.590846 |
| C | -3.355866 | -1.407791 | 1.505788  |
| H | -3.560081 | 3.537664  | 0.028879  |
| H | -2.570924 | 3.068679  | 1.421487  |
| H | -1.286718 | 4.591413  | -0.095564 |
| H | -1.497982 | 3.466904  | -1.432273 |
| H | 3.101448  | 3.266829  | 0.828341  |
| H | 1.114180  | 4.453956  | -0.062222 |
| H | 4.056404  | 1.332230  | 1.977942  |
| H | 3.776474  | -0.869997 | 3.092043  |
| H | 1.502669  | -1.917262 | 3.195885  |
| H | -0.401017 | -0.868550 | 2.068945  |
| H | -1.498307 | -3.467258 | 1.431952  |
| H | -1.287333 | -4.591326 | 0.094850  |
| H | -3.560592 | -3.537187 | -0.028863 |
| H | -2.571591 | -3.068171 | -1.421571 |
| H | 1.113620  | -4.454101 | 0.062107  |
| H | 3.101128  | -3.267119 | -0.828153 |
| H | -0.400829 | 0.868569  | -2.069137 |
| H | 1.503059  | 1.917092  | -3.195890 |
| H | 3.776766  | 0.869631  | -3.091801 |
| H | 4.056375  | -1.332626 | -1.977665 |
| H | -3.518913 | -0.375398 | 1.840316  |
| H | -2.630377 | -1.856960 | 2.200940  |
| H | -4.308170 | -1.949605 | 1.619942  |
| H | -2.630888 | 1.857379  | -2.200797 |
| H | -4.308536 | 1.949904  | -1.619339 |
| H | -3.519239 | 0.375752  | -1.840009 |

TS<sub>2</sub>

|   |          |           |           |
|---|----------|-----------|-----------|
| C | 2.120657 | -1.794827 | 1.087931  |
| C | 3.288373 | -2.181420 | 0.194428  |
| C | 4.028107 | -0.918113 | -0.198980 |
| C | 3.162544 | 0.324289  | -0.270599 |
| C | 1.763040 | 0.358380  | -0.158220 |

|   |           |           |           |
|---|-----------|-----------|-----------|
| C | 1.118490  | -0.957159 | 0.290942  |
| C | 1.142940  | 1.662547  | -0.408001 |
| C | 1.946863  | 2.849686  | -0.436722 |
| C | 3.361296  | 2.747484  | -0.420686 |
| C | 3.932437  | 1.513262  | -0.417279 |
| C | 1.349921  | 4.134224  | -0.558313 |
| C | -0.003675 | 4.280885  | -0.734537 |
| C | -0.793088 | 3.118951  | -0.847589 |
| C | -0.231122 | 1.870995  | -0.697397 |
| C | -0.111162 | -1.517678 | 0.095740  |
| H | 1.622569  | -2.701509 | 1.409602  |
| C | -1.390984 | -0.879470 | -0.337440 |
| C | -1.899393 | -1.266334 | -1.563635 |
| C | -1.052646 | -2.233358 | -2.340509 |
| C | -0.615098 | -3.398897 | -1.427552 |
| C | -0.495108 | -3.030584 | 0.079699  |
| C | -3.162788 | -0.793356 | -1.995343 |
| C | -3.915888 | 0.019923  | -1.185174 |
| C | -3.457865 | 0.373006  | 0.115069  |
| C | -2.187626 | -0.098623 | 0.561555  |
| C | 2.539216  | -1.104314 | 2.393992  |
| C | -1.745077 | 0.266281  | 1.863356  |
| C | -2.519888 | 1.060698  | 2.675033  |
| C | -3.776582 | 1.536902  | 2.227483  |
| C | -4.233884 | 1.197203  | 0.977137  |
| H | -1.515057 | -3.054818 | 0.494004  |
| C | 0.235633  | -4.166611 | 0.796346  |
| H | 3.966581  | -2.885874 | 0.702020  |
| H | 2.891777  | -2.700330 | -0.693080 |
| H | 4.536497  | -1.035016 | -1.170589 |
| H | 4.832434  | -0.715578 | 0.526760  |
| H | 3.967822  | 3.655876  | -0.458128 |
| H | 5.019816  | 1.414054  | -0.474066 |
| H | 2.006807  | 5.008075  | -0.536565 |
| H | -0.453090 | 5.271730  | -0.833248 |
| H | -1.859027 | 3.199778  | -1.075350 |
| H | -0.861057 | 1.015124  | -0.871660 |
| H | -0.157110 | -1.704751 | -2.706705 |
| H | -1.583714 | -2.608162 | -3.226855 |
| H | 0.358160  | -3.782085 | -1.774005 |
| H | -1.334209 | -4.228563 | -1.515426 |
| H | -3.536256 | -1.086323 | -2.980293 |
| H | -4.886662 | 0.393606  | -1.521701 |
| H | -0.771817 | -0.085995 | 2.210214  |
| H | -2.163574 | 1.330835  | 3.672179  |
| H | -4.380209 | 2.172480  | 2.879891  |
| H | -5.202988 | 1.559485  | 0.623118  |
| H | 0.280256  | -4.022977 | 1.885609  |
| H | 1.251168  | -4.345203 | 0.415037  |
| H | -0.337678 | -5.091164 | 0.619074  |
| H | 3.070302  | -0.152489 | 2.247389  |
| H | 3.198956  | -1.769937 | 2.974010  |
| H | 1.653435  | -0.894113 | 3.014343  |
| C | -2.849480 | 0.584686  | -1.190907 |
| C | -3.652775 | 1.376428  | -0.123860 |
| C | -3.064163 | 1.227322  | 1.284786  |
| C | -1.633481 | 1.699210  | 1.238733  |
| C | -0.862573 | 1.275118  | 0.163697  |
| C | -1.494720 | 0.172543  | -0.628445 |
| C | 0.379791  | 1.924645  | -0.110882 |
| C | 0.909942  | 2.844395  | 0.845318  |

(*M,P*)-cis-2

|   |           |           |           |
|---|-----------|-----------|-----------|
| C | 0.152944  | 3.148679  | 2.008666  |
| C | -1.106328 | 2.625610  | 2.172105  |
| C | 2.156319  | 3.479529  | 0.580533  |
| C | 2.815732  | 3.269004  | -0.606174 |
| C | 2.247285  | 2.424463  | -1.591435 |
| C | 1.065358  | 1.768589  | -1.346524 |
| C | -1.030733 | -1.096413 | -0.576301 |
| H | -3.415252 | -0.319573 | -1.422683 |
| C | 0.161149  | -1.484849 | 0.244445  |
| C | -0.155682 | -2.111792 | 1.439882  |
| C | -1.612477 | -2.389823 | 1.708428  |
| C | -2.364544 | -2.892123 | 0.448951  |
| C | -1.757330 | -2.406485 | -0.895558 |
| C | 0.875140  | -2.498989 | 2.332830  |
| C | 2.195191  | -2.307755 | 2.006501  |
| C | 2.552439  | -1.816753 | 0.721155  |
| C | 1.520598  | -1.443471 | -0.192888 |
| C | -2.687297 | 1.384335  | -2.485099 |
| C | 1.883462  | -1.148847 | -1.536741 |
| C | 3.199280  | -1.144918 | -1.931641 |
| C | 4.228467  | -1.418539 | -0.997035 |
| C | 3.910044  | -1.753472 | 0.296884  |
| H | -0.944804 | -3.106350 | -1.150699 |
| C | -2.750004 | -2.514978 | -2.052059 |
| H | -3.652593 | 2.449462  | -0.378761 |
| H | -4.704110 | 1.049933  | -0.136619 |
| H | -3.130559 | 0.174245  | 1.601836  |
| H | -3.638534 | 1.817524  | 2.013629  |
| H | 0.564616  | 3.846640  | 2.742562  |
| H | -1.716514 | 2.919268  | 3.030916  |
| H | 2.566652  | 4.161074  | 1.330774  |
| H | 3.765990  | 3.771130  | -0.803658 |
| H | 2.752560  | 2.296132  | -2.551828 |
| H | 0.617153  | 1.139146  | -2.114800 |
| H | -2.085558 | -1.461702 | 2.064260  |
| H | -1.713787 | -3.115650 | 2.528144  |
| H | -3.409663 | -2.547364 | 0.506005  |
| H | -2.396052 | -3.993098 | 0.445333  |
| H | 0.607078  | -2.952787 | 3.290972  |
| H | 2.986804  | -2.586252 | 2.707053  |
| H | 1.092912  | -0.949441 | -2.262018 |
| H | 3.454844  | -0.928486 | -2.971819 |
| H | 5.273298  | -1.388049 | -1.315760 |
| H | 4.695461  | -2.006486 | 1.014225  |
| H | -2.368880 | -2.024632 | -2.960725 |
| H | -3.741102 | -2.099315 | -1.822905 |
| H | -2.905258 | -3.579229 | -2.290370 |
| H | -2.079812 | 2.289428  | -2.318151 |
| H | -3.667665 | 1.707212  | -2.871321 |
| H | -2.196535 | 0.785130  | -3.267783 |

TS<sub>3</sub>

|   |          |           |           |
|---|----------|-----------|-----------|
| C | 0.717080 | -2.909118 | -0.235694 |
| C | 1.050402 | -3.122339 | -1.742149 |
| C | 1.449922 | -1.841557 | -2.504992 |
| C | 2.086404 | -0.838842 | -1.587288 |
| C | 1.428538 | -0.597704 | -0.393347 |
| C | 0.259119 | -1.452644 | -0.072318 |
| C | 1.994625 | 0.293386  | 0.577807  |
| C | 3.196085 | 0.989261  | 0.250231  |
| C | 3.817382 | 0.754002  | -1.007664 |
| C | 3.282808 | -0.146579 | -1.895570 |
| C | 3.741800 | 1.913393  | 1.184964  |

|   |           |           |           |
|---|-----------|-----------|-----------|
| C | 3.129800  | 2.137446  | 2.394341  |
| C | 1.944428  | 1.437443  | 2.726593  |
| C | 1.392730  | 0.540463  | 1.842996  |
| C | -1.022965 | -1.126037 | 0.265941  |
| H | -0.115829 | -3.579049 | -0.019940 |
| C | -1.888668 | 0.080102  | -0.083808 |
| C | -3.271775 | -0.167162 | -0.084516 |
| C | -3.918763 | -1.540977 | -0.048562 |
| C | -2.972617 | -2.687717 | 0.274861  |
| C | -1.855758 | -2.101267 | 1.126905  |
| C | -4.216217 | 0.896461  | -0.112538 |
| C | -3.830267 | 2.202296  | -0.130843 |
| C | -2.456198 | 2.511284  | -0.301261 |
| C | -1.490196 | 1.455266  | -0.386737 |
| C | 1.900690  | -3.303232 | 0.654272  |
| C | -0.207784 | 1.852252  | -0.854173 |
| C | 0.141960  | 3.167910  | -1.060804 |
| C | -0.783119 | 4.204697  | -0.822218 |
| C | -2.067525 | 3.868363  | -0.473449 |
| H | -2.346573 | -1.414837 | 1.839103  |
| C | -1.176078 | -3.110919 | 2.054659  |
| H | 1.867376  | -3.857395 | -1.810109 |
| H | 0.181000  | -3.572119 | -2.243738 |
| H | 0.541888  | -1.384680 | -2.933869 |
| H | 2.110534  | -2.080094 | -3.350626 |
| H | 4.735561  | 1.294775  | -1.251804 |
| H | 3.776227  | -0.332484 | -2.853442 |
| H | 4.660312  | 2.444534  | 0.920684  |
| H | 3.555379  | 2.851950  | 3.103147  |
| H | 1.465475  | 1.612543  | 3.693033  |
| H | 0.475512  | 0.011795  | 2.106514  |
| H | -4.435036 | -1.693248 | -1.011317 |
| H | -4.716149 | -1.508596 | 0.711736  |
| H | -2.544610 | -3.139665 | -0.635092 |
| H | -3.511524 | -3.486541 | 0.808001  |
| H | -5.278830 | 0.642319  | -0.068358 |
| H | -4.562523 | 3.011781  | -0.077649 |
| H | 0.512714  | 1.094961  | -1.122764 |
| H | 1.142417  | 3.400875  | -1.434040 |
| H | -0.497397 | 5.249681  | -0.963400 |
| H | -2.832604 | 4.640586  | -0.354860 |
| H | -0.282119 | -2.687417 | 2.534772  |
| H | -0.896023 | -4.060177 | 1.579403  |
| H | -1.888261 | -3.362959 | 2.856253  |
| H | 2.824660  | -2.781343 | 0.360808  |
| H | 2.092812  | -4.384635 | 0.569735  |
| H | 1.710554  | -3.078148 | 1.713976  |

(*P,P*)-*cis*-2

|   |           |           |           |
|---|-----------|-----------|-----------|
| C | -2.885937 | 1.468848  | -0.284395 |
| C | -2.716674 | 2.896796  | 0.284212  |
| C | -1.531994 | 2.997744  | 1.247650  |
| C | -0.285411 | 2.604434  | 0.503592  |
| C | -0.353645 | 1.470024  | -0.292869 |
| C | -1.595427 | 0.660158  | -0.157231 |
| C | 0.761252  | 1.110818  | -1.116588 |
| C | 1.988011  | 1.823085  | -0.968289 |
| C | 2.042667  | 2.935091  | -0.083807 |
| C | 0.921764  | 3.338478  | 0.598393  |
| C | 3.126541  | 1.413485  | -1.718929 |
| C | 3.046675  | 0.367283  | -2.605110 |
| C | 1.811239  | -0.298345 | -2.802774 |
| C | 0.700175  | 0.066880  | -2.082021 |



|   |           |           |           |
|---|-----------|-----------|-----------|
| C | -1.595629 | -0.659869 | 0.157234  |
| H | -3.659475 | 0.971298  | 0.315866  |
| C | -0.354058 | -1.470040 | 0.292962  |
| C | -0.286045 | -2.604492 | -0.503464 |
| C | -1.532705 | -2.997618 | -1.247496 |
| C | -2.717349 | -2.896292 | -0.284060 |
| C | -2.886424 | -1.468171 | 0.284108  |
| C | 0.920994  | -3.338760 | -0.598265 |
| C | 2.041985  | -2.935557 | 0.083897  |
| C | 1.987546  | -1.823524 | 0.968354  |
| C | 0.760918  | -1.111032 | 1.116662  |
| C | -3.359816 | 1.501584  | -1.739944 |
| C | 0.700055  | -0.067062 | 2.082074  |
| C | 1.811200  | 0.297976  | 2.802796  |
| C | 3.046514  | -0.367874 | 2.605113  |
| C | 3.126170  | -1.414109 | 1.718955  |
| H | -3.659518 | -0.970545 | -0.316674 |
| C | -3.360993 | -1.500444 | 1.739440  |
| H | -2.544991 | 3.609733  | -0.539636 |
| H | -3.648991 | 3.207811  | 0.779674  |
| H | -1.692499 | 2.320570  | 2.106883  |
| H | -1.436009 | 4.014872  | 1.655135  |
| H | 2.985454  | 3.477473  | 0.025928  |
| H | 0.960560  | 4.216199  | 1.249514  |
| H | 4.067624  | 1.952651  | -1.580533 |
| H | 3.927309  | 0.058795  | -3.173812 |
| H | 1.742598  | -1.103477 | -3.538472 |
| H | -0.250986 | -0.439596 | -2.250206 |
| H | -1.436924 | -4.014812 | -1.654863 |
| H | -1.693069 | -2.320507 | -2.106806 |
| H | -2.545704 | -3.609002 | 0.539996  |
| H | -3.649730 | -3.207344 | -0.779378 |
| H | 0.959614  | -4.216505 | -1.249364 |
| H | 2.984675  | -3.478108 | -0.025848 |
| H | -0.251012 | 0.439593  | 2.250259  |
| H | 1.742721  | 1.103136  | 3.538479  |
| H | 3.927221  | -0.059526 | 3.173778  |
| H | 4.067154  | -1.953443 | 1.580542  |
| H | -3.562405 | -0.487216 | 2.120610  |
| H | -2.596419 | -1.958438 | 2.388403  |
| H | -4.286015 | -2.091201 | 1.838019  |
| H | -2.594831 | 1.959550  | -2.388442 |
| H | -4.284656 | 2.092577  | -1.838815 |
| H | -3.561289 | 0.488483  | -2.121423 |

(*P,P*)-*cis*-2\*

|   |           |           |           |
|---|-----------|-----------|-----------|
| C | 2.589656  | 1.977935  | 0.145988  |
| C | 2.171389  | 3.421845  | -0.207731 |
| C | 0.858682  | 3.471286  | -0.970348 |
| C | -0.205084 | 2.762308  | -0.186478 |
| C | 0.137239  | 1.514703  | 0.417227  |
| C | 1.429512  | 0.986250  | 0.118268  |
| C | -0.903785 | 0.797565  | 1.145910  |
| C | -2.262784 | 1.228324  | 1.029215  |
| C | -2.555637 | 2.419057  | 0.328041  |
| C | -1.529928 | 3.188102  | -0.217460 |
| C | -3.289885 | 0.449587  | 1.635954  |
| C | -2.984767 | -0.660623 | 2.391163  |
| C | -1.635818 | -1.019192 | 2.595925  |
| C | -0.622134 | -0.290478 | 1.997542  |
| C | 1.682297  | -0.399212 | -0.170171 |
| H | 3.348461  | 1.650518  | -0.580990 |
| C | 0.680556  | -1.343792 | -0.524621 |

|   |           |           |           |
|---|-----------|-----------|-----------|
| C | 0.851278  | -2.725406 | -0.125114 |
| C | 2.209133  | -3.270953 | 0.217934  |
| C | 3.137235  | -2.203299 | 0.777151  |
| C | 3.106399  | -0.939793 | -0.087180 |
| C | -0.272217 | -3.522880 | 0.043876  |
| C | -1.562699 | -3.075911 | -0.261152 |
| C | -1.743504 | -1.841553 | -0.919424 |
| C | -0.607252 | -0.998699 | -1.141665 |
| C | 3.231521  | 1.993162  | 1.547942  |
| C | -0.763866 | 0.105222  | -1.997962 |
| C | -2.007107 | 0.457236  | -2.509325 |
| C | -3.146151 | -0.303663 | -2.189189 |
| C | -3.015325 | -1.436696 | -1.413175 |
| H | 3.752428  | -0.206609 | 0.403705  |
| C | 3.678741  | -1.164289 | -1.493163 |
| H | 2.046750  | 4.005820  | 0.718686  |
| H | 2.978371  | 3.906819  | -0.777576 |
| H | 0.975773  | 2.968210  | -1.949463 |
| H | 0.557506  | 4.508215  | -1.180765 |
| H | -3.595317 | 2.745769  | 0.242524  |
| H | -1.774083 | 4.111949  | -0.749548 |
| H | -4.329194 | 0.763054  | 1.505348  |
| H | -3.782112 | -1.249114 | 2.851467  |
| H | -1.387375 | -1.866937 | 3.238881  |
| H | 0.417354  | -0.570746 | 2.174604  |
| H | 2.655796  | -3.693717 | -0.701074 |
| H | 2.109436  | -4.112162 | 0.920106  |
| H | 4.166594  | -2.589429 | 0.845447  |
| H | 2.825816  | -1.939404 | 1.802210  |
| H | -0.141648 | -4.525645 | 0.461274  |
| H | -2.427521 | -3.717747 | -0.074068 |
| H | 0.111149  | 0.706017  | -2.253816 |
| H | -2.096103 | 1.328806  | -3.161997 |
| H | -4.126267 | -0.008378 | -2.571877 |
| H | -3.884693 | -2.062405 | -1.193089 |
| H | 3.722658  | -0.216046 | -2.051398 |
| H | 3.065480  | -1.862640 | -2.083488 |
| H | 4.702175  | -1.569526 | -1.434715 |
| H | 2.493710  | 2.334549  | 2.291342  |
| H | 4.082257  | 2.693805  | 1.566229  |
| H | 3.598426  | 1.010117  | 1.874177  |

(*M,M*)-*trans*-1

|   |           |           |           |
|---|-----------|-----------|-----------|
| C | 0.342836  | -1.958214 | -0.778935 |
| C | -0.703301 | -3.028776 | -1.143801 |
| C | -1.808955 | -2.442601 | -2.021027 |
| C | -2.558468 | -1.460310 | -1.168864 |
| C | -1.817207 | -0.642373 | -0.323455 |
| C | -0.337041 | -0.595609 | -0.493147 |
| C | -2.506710 | 0.104285  | 0.699293  |
| C | -3.935306 | 0.141345  | 0.689960  |
| C | -4.647599 | -0.607267 | -0.284537 |
| C | -3.972618 | -1.420325 | -1.158928 |
| C | -4.629748 | 0.899421  | 1.675201  |
| C | -3.949608 | 1.565857  | 2.663683  |
| C | -2.537005 | 1.487646  | 2.713703  |
| C | -1.840687 | 0.783802  | 1.760035  |
| C | 0.336980  | 0.594866  | -0.493782 |
| H | 0.859842  | -2.305383 | 0.129303  |
| C | 1.817114  | 0.642169  | -0.324097 |
| C | 2.558238  | 1.459975  | -1.169770 |
| C | 1.808723  | 2.442171  | -2.022073 |
| C | 0.702521  | 3.027924  | -1.145238 |

|   |           |           |           |
|---|-----------|-----------|-----------|
| C | -0.343333 | 1.956974  | -0.780987 |
| C | 3.972405  | 1.420158  | -1.159871 |
| C | 4.647567  | 0.607554  | -0.285208 |
| C | 3.935402  | -0.140643 | 0.689712  |
| C | 2.506812  | -0.103763 | 0.699076  |
| C | 1.376970  | -1.895770 | -1.913071 |
| C | 1.840921  | -0.782671 | 1.760272  |
| C | 2.537366  | -1.485862 | 2.714342  |
| C | 3.949954  | -1.564038 | 2.664234  |
| C | 4.629976  | -0.898126 | 1.675304  |
| H | -0.861710 | 2.304108  | 0.126499  |
| C | -1.376244 | 1.893135  | -1.916190 |
| H | -0.197319 | -3.863524 | -1.651572 |
| H | -1.167119 | -3.446281 | -0.235391 |
| H | -2.491020 | -3.223684 | -2.387436 |
| H | -1.372069 | -1.955527 | -2.910425 |
| H | -5.739749 | -0.561004 | -0.295230 |
| H | -4.524488 | -2.046685 | -1.865092 |
| H | -5.722134 | 0.927873  | 1.635743  |
| H | -4.492092 | 2.139197  | 3.419201  |
| H | -1.995299 | 1.987178  | 3.520638  |
| H | -0.754161 | 0.733088  | 1.824638  |
| H | 1.372449  | 1.955166  | -2.911804 |
| H | 2.490748  | 3.223498  | -2.388033 |
| H | 0.196493  | 3.862540  | -1.653190 |
| H | 1.165859  | 3.445494  | -0.236613 |
| H | 4.524159  | 2.046332  | -1.866293 |
| H | 5.739722  | 0.561433  | -0.295944 |
| H | 0.754399  | -0.731956 | 1.824890  |
| H | 1.995725  | -1.984854 | 3.521659  |
| H | 4.492575  | -2.136946 | 3.419978  |
| H | 5.722359  | -0.926544 | 1.635759  |
| H | -0.912910 | 1.544819  | -2.853775 |
| H | -1.789767 | 2.897212  | -2.097001 |
| H | -2.222442 | 1.231514  | -1.700417 |
| H | 0.914814  | -1.547708 | -2.851339 |
| H | 1.789906  | -2.900270 | -2.092841 |
| H | 2.223503  | -1.234700 | -1.696932 |

TS<sub>5</sub>

|   |           |           |           |
|---|-----------|-----------|-----------|
| C | -0.337130 | -0.915194 | 1.468374  |
| C | -0.407989 | -2.435715 | 1.277361  |
| C | 0.487903  | -2.868362 | 0.125368  |
| C | 1.743173  | -2.039570 | 0.039557  |
| C | 1.703799  | -0.631832 | 0.018020  |
| C | 0.292603  | -0.105064 | 0.308547  |
| C | 2.984063  | 0.037395  | -0.211607 |
| C | 4.199838  | -0.732757 | -0.232898 |
| C | 4.161393  | -2.142031 | -0.118893 |
| C | 2.955277  | -2.769351 | -0.025452 |
| C | 5.467867  | -0.106447 | -0.400012 |
| C | 5.582437  | 1.245756  | -0.588030 |
| C | 4.400912  | 2.014186  | -0.634673 |
| C | 3.169820  | 1.428412  | -0.455762 |
| C | -0.457471 | 0.954668  | -0.158752 |
| H | -1.349152 | -0.534319 | 1.634343  |
| C | -1.953429 | 0.894348  | -0.089397 |
| C | -2.713973 | 2.025249  | 0.207142  |
| C | -2.118768 | 3.398746  | 0.056314  |
| C | -0.983718 | 3.324067  | -0.957852 |
| C | 0.097581  | 2.341995  | -0.495705 |
| C | -4.091131 | 1.898653  | 0.531834  |
| C | -4.734901 | 0.692356  | 0.471465  |

|   |           |           |           |
|---|-----------|-----------|-----------|
| C | -4.064031 | -0.428755 | -0.089861 |
| C | -2.684491 | -0.309582 | -0.435994 |
| C | 0.450947  | -0.548259 | 2.738198  |
| C | -2.122449 | -1.344536 | -1.230822 |
| C | -2.840532 | -2.468092 | -1.569773 |
| C | -4.165559 | -2.636990 | -1.107325 |
| C | -4.765723 | -1.628422 | -0.391877 |
| H | 0.828487  | 2.266655  | -1.312108 |
| C | 0.751343  | 2.916070  | 0.781254  |
| H | -0.088144 | -2.939645 | 2.203105  |
| H | -1.442406 | -2.755992 | 1.085201  |
| H | -0.054074 | -2.765525 | -0.824790 |
| H | 0.749799  | -3.931971 | 0.210875  |
| H | 5.096066  | -2.708093 | -0.133123 |
| H | 2.906983  | -3.860070 | 0.021005  |
| H | 6.356112  | -0.743833 | -0.388900 |
| H | 6.559665  | 1.715775  | -0.719945 |
| H | 4.454020  | 3.089229  | -0.823880 |
| H | 2.313639  | 2.071290  | -0.537797 |
| H | -1.771750 | 3.815210  | 1.015824  |
| H | -2.908175 | 4.080945  | -0.295116 |
| H | -0.526600 | 4.314603  | -1.105718 |
| H | -1.392975 | 3.007667  | -1.931442 |
| H | -4.634960 | 2.796557  | 0.839339  |
| H | -5.785013 | 0.599253  | 0.760224  |
| H | -1.108770 | -1.218500 | -1.608035 |
| H | -2.383397 | -3.232919 | -2.202544 |
| H | -4.719244 | -3.546703 | -1.352176 |
| H | -5.809313 | -1.716065 | -0.077549 |
| H | -0.008039 | 3.099198  | 1.554550  |
| H | 1.255265  | 3.874123  | 0.573585  |
| H | 1.480443  | 2.231648  | 1.229930  |
| H | 1.482751  | -0.932531 | 2.709076  |
| H | -0.042840 | -0.984084 | 3.621490  |
| H | 0.495629  | 0.542439  | 2.882085  |

(*M,P*)-*trans*-1

|   |           |           |           |
|---|-----------|-----------|-----------|
| C | 0.257898  | 1.363939  | 1.312853  |
| C | 0.033534  | 2.854343  | 0.918629  |
| C | -0.743929 | 3.028245  | -0.399363 |
| C | -1.945630 | 2.123249  | -0.397013 |
| C | -1.721280 | 0.799724  | -0.050889 |
| C | -0.296358 | 0.454316  | 0.219023  |
| C | -2.827356 | -0.076772 | 0.174308  |
| C | -4.146792 | 0.388764  | -0.107928 |
| C | -4.332037 | 1.726928  | -0.550228 |
| C | -3.260522 | 2.578899  | -0.662075 |
| C | -5.248866 | -0.492536 | 0.085315  |
| C | -5.059898 | -1.763547 | 0.570198  |
| C | -3.754709 | -2.209706 | 0.897564  |
| C | -2.670869 | -1.388349 | 0.704142  |
| C | 0.446419  | -0.455018 | -0.445946 |
| H | 1.334601  | 1.187979  | 1.411570  |
| C | 1.854766  | -0.796935 | -0.067283 |
| C | 2.057274  | -2.126205 | 0.275693  |
| C | 0.859457  | -3.040063 | 0.235379  |
| C | 0.036489  | -2.854464 | -1.056315 |
| C | 0.046202  | -1.395226 | -1.583794 |
| C | 3.350532  | -2.582116 | 0.633531  |
| C | 4.424554  | -1.727169 | 0.623266  |
| C | 4.268060  | -0.378928 | 0.201892  |
| C | 2.973404  | 0.089339  | -0.177877 |
| C | -0.375014 | 1.025319  | 2.666578  |

|   |           |           |           |
|---|-----------|-----------|-----------|
| C | 2.858587  | 1.416279  | -0.683455 |
| C | 3.952547  | 2.243291  | -0.764446 |
| C | 5.227734  | 1.790851  | -0.342525 |
| C | 5.379721  | 0.507947  | 0.122904  |
| H | 0.905620  | -1.322075 | -2.272225 |
| C | -1.177561 | -1.071880 | -2.434660 |
| H | -0.525530 | 3.363017  | 1.720220  |
| H | 1.002756  | 3.368963  | 0.837234  |
| H | -0.089701 | 2.770272  | -1.249728 |
| H | -1.041080 | 4.078069  | -0.535897 |
| H | -5.344687 | 2.076374  | -0.768374 |
| H | -3.414999 | 3.620341  | -0.957236 |
| H | -6.254394 | -0.132380 | -0.148927 |
| H | -5.913768 | -2.428939 | 0.718819  |
| H | -3.612370 | -3.211167 | 1.311200  |
| H | -1.669540 | -1.732729 | 0.962824  |
| H | 0.220969  | -2.809282 | 1.105233  |
| H | 1.167937  | -4.088924 | 0.351202  |
| H | -1.001354 | -3.168358 | -0.865165 |
| H | 0.424072  | -3.519553 | -1.843608 |
| H | 3.484933  | -3.628476 | 0.920973  |
| H | 5.418076  | -2.079505 | 0.912946  |
| H | 1.883975  | 1.770183  | -1.021402 |
| H | 3.840600  | 3.254918  | -1.162384 |
| H | 6.088242  | 2.461725  | -0.401145 |
| H | 6.362872  | 0.142616  | 0.432236  |
| H | -1.180516 | -0.018792 | -2.754575 |
| H | -2.125867 | -1.277250 | -1.922793 |
| H | -1.156909 | -1.694345 | -3.343788 |
| H | -1.466224 | 1.178898  | 2.655952  |
| H | 0.044059  | 1.666225  | 3.458535  |
| H | -0.179916 | -0.022919 | 2.943430  |

TS<sub>6</sub>

|   |           |           |           |
|---|-----------|-----------|-----------|
| C | 0.094113  | 2.167221  | 0.230293  |
| C | -0.565227 | 3.237354  | -0.695977 |
| C | -1.538551 | 2.664132  | -1.731626 |
| C | -2.447536 | 1.686397  | -1.048759 |
| C | -1.829776 | 0.725972  | -0.265914 |
| C | -0.341507 | 0.762543  | -0.176743 |
| C | -2.620669 | -0.178376 | 0.517092  |
| C | -4.043033 | -0.137490 | 0.384041  |
| C | -4.634796 | 0.812509  | -0.492119 |
| C | -3.856039 | 1.716347  | -1.172049 |
| C | -4.842766 | -1.037568 | 1.144105  |
| C | -4.268325 | -1.925674 | 2.019687  |
| C | -2.860943 | -1.946316 | 2.180080  |
| C | -2.061583 | -1.100484 | 1.448659  |
| C | 0.412164  | -0.334360 | -0.490722 |
| H | 1.166064  | 2.257571  | 0.061073  |
| C | 1.848622  | -0.713004 | -0.157857 |
| C | 2.139788  | -2.079594 | -0.311081 |
| C | 1.060142  | -3.133054 | -0.193085 |
| C | -0.228090 | -2.790511 | -0.944094 |
| C | -0.137246 | -1.378739 | -1.505460 |
| C | 3.469513  | -2.532639 | -0.509280 |
| C | 4.524285  | -1.662986 | -0.515363 |
| C | 4.312263  | -0.329652 | -0.081210 |
| C | 2.984057  | 0.117721  | 0.223771  |
| C | -0.222197 | 2.457951  | 1.701516  |
| C | 2.910597  | 1.293477  | 1.025104  |
| C | 4.012073  | 2.067193  | 1.312034  |
| C | 5.287541  | 1.714539  | 0.819163  |

|   |           |           |           |
|---|-----------|-----------|-----------|
| C | 5.430009  | 0.517632  | 0.163034  |
| H | 0.696353  | -1.406817 | -2.230072 |
| C | -1.350416 | -1.065265 | -2.380227 |
| H | -1.115860 | 3.959184  | -0.072553 |
| H | 0.223654  | 3.805567  | -1.210848 |
| H | -0.971873 | 2.148502  | -2.526654 |
| H | -2.108849 | 3.470204  | -2.215708 |
| H | -5.722832 | 0.827321  | -0.598037 |
| H | -4.319674 | 2.463027  | -1.822465 |
| H | -5.928792 | -1.000808 | 1.022311  |
| H | -4.892375 | -2.607072 | 2.602939  |
| H | -2.408305 | -2.639612 | 2.893410  |
| H | -0.979997 | -1.126579 | 1.585894  |
| H | 0.851771  | -3.240203 | 0.884770  |
| H | 1.463156  | -4.103133 | -0.516221 |
| H | -1.107784 | -2.882938 | -0.289875 |
| H | -0.382429 | -3.491544 | -1.779275 |
| H | 3.632280  | -3.595584 | -0.706035 |
| H | 5.536263  | -1.996701 | -0.757971 |
| H | 1.977625  | 1.540537  | 1.513981  |
| H | 3.897262  | 2.944688  | 1.953210  |
| H | 6.154335  | 2.348640  | 1.019497  |
| H | 6.418921  | 0.164850  | -0.142592 |
| H | -1.351409 | -1.788171 | -3.212173 |
| H | -1.297428 | -0.061506 | -2.822352 |
| H | -2.314037 | -1.172658 | -1.865162 |
| H | -1.310991 | 2.476553  | 1.868359  |
| H | 0.179733  | 3.438607  | 2.002142  |
| H | 0.196419  | 1.696419  | 2.378327  |

B3LYP/SVP in the gas phase

(*P,P*)-*trans*-1

|   |           |           |           |
|---|-----------|-----------|-----------|
| C | -0.079718 | 0.509226  | -1.979456 |
| C | 0.528601  | 1.822362  | -2.582552 |
| C | 1.481820  | 2.562424  | -1.622310 |
| C | 2.446721  | 1.589853  | -0.991608 |
| C | 1.901346  | 0.426507  | -0.447057 |
| C | 0.413336  | 0.330166  | -0.539881 |
| C | 2.766388  | -0.589287 | 0.080258  |
| C | 4.183868  | -0.347318 | 0.116064  |
| C | 4.692422  | 0.875951  | -0.399238 |
| C | 3.846199  | 1.810257  | -0.955674 |
| C | 5.046065  | -1.349145 | 0.646051  |
| C | 4.547246  | -2.551703 | 1.098339  |
| C | 3.154991  | -2.808077 | 1.030646  |
| C | 2.291260  | -1.852313 | 0.536796  |
| C | -0.413392 | 0.330553  | 0.539835  |
| H | -1.172097 | 0.620339  | -1.950244 |
| C | -1.901399 | 0.426707  | 0.446982  |
| C | -2.446887 | 1.590296  | 0.990883  |
| C | -1.482128 | 2.563414  | 1.620939  |
| C | -0.528492 | 1.824221  | 2.581440  |
| C | 0.079737  | 0.510659  | 1.979259  |
| C | -3.846381 | 1.810604  | 0.954744  |
| C | -4.692511 | 0.875983  | 0.398709  |
| C | -4.183843 | -0.347514 | -0.115954 |
| C | -2.766357 | -0.589394 | -0.079911 |
| C | 0.251665  | -0.698590 | -2.873365 |
| C | -2.291146 | -1.852630 | -0.535772 |
| C | -3.154798 | -2.808666 | -1.029242 |
| C | -4.547052 | -2.552379 | -1.097212 |
| C | -5.045956 | -1.349623 | -0.645541 |
| H | 1.172115  | 0.621696  | 1.949895  |
| C | -0.251624 | -0.696537 | 2.874016  |
| H | 1.089323  | 1.572692  | -3.497877 |
| H | -0.282273 | 2.502344  | -2.888836 |
| H | 0.887799  | 3.055565  | -0.831815 |
| H | 2.020528  | 3.361925  | -2.154648 |
| H | 5.770576  | 1.055268  | -0.365568 |
| H | 4.249824  | 2.737618  | -1.372225 |
| H | 6.120847  | -1.149064 | 0.677655  |
| H | 5.222151  | -3.312976 | 1.497767  |
| H | 2.764652  | -3.771776 | 1.368002  |
| H | 1.222778  | -2.060815 | 0.477491  |
| H | -2.020979 | 3.363058  | 2.152929  |
| H | -0.888420 | 3.056348  | 0.830066  |
| H | -1.088830 | 1.575281  | 3.497197  |
| H | 0.282414  | 2.504550  | 2.886856  |
| H | -4.250073 | 2.738152  | 1.370812  |
| H | -5.770670 | 1.055227  | 0.364846  |
| H | -1.222669 | -2.061095 | -0.476244 |
| H | -2.764383 | -3.772519 | -1.366077 |
| H | -5.221886 | -3.313867 | -1.496351 |
| H | -6.120740 | -1.149582 | -0.677338 |
| H | 0.108376  | -0.522930 | 3.901473  |
| H | 0.222231  | -1.619302 | 2.508963  |
| H | -1.339364 | -0.866663 | 2.925187  |
| H | 1.339410  | -0.868758 | -2.924359 |
| H | -0.108289 | -0.525665 | -3.900956 |
| H | -0.222233 | -1.621090 | -2.507720 |

*(P,P)*-trans-1\*

|   |           |           |           |
|---|-----------|-----------|-----------|
| C | -0.220770 | -1.884286 | -1.092210 |
| C | 0.504599  | -2.146025 | -2.431788 |
| C | 1.994629  | -2.396638 | -2.198209 |
| C | 2.624746  | -1.453956 | -1.196323 |
| C | 1.824290  | -0.624512 | -0.341087 |
| C | 0.392758  | -0.599555 | -0.523212 |
| C | 2.511620  | 0.181664  | 0.669367  |
| C | 3.950628  | 0.238295  | 0.682065  |
| C | 4.683465  | -0.531863 | -0.254354 |
| C | 4.022893  | -1.367162 | -1.148793 |
| C | 4.607620  | 1.032566  | 1.662704  |
| C | 3.895157  | 1.710096  | 2.638729  |
| C | 2.492606  | 1.609661  | 2.667386  |
| C | 1.825251  | 0.856639  | 1.702221  |
| C | -0.392765 | 0.599553  | -0.523223 |
| H | -1.279729 | -1.689654 | -1.313882 |
| C | -1.824303 | 0.624523  | -0.341093 |
| C | -2.624758 | 1.453990  | -1.196277 |
| C | -1.994650 | 2.396750  | -2.198096 |
| C | -0.504649 | 2.146105  | -2.431751 |
| C | 0.220769  | 1.884285  | -1.092213 |
| C | -4.022914 | 1.367181  | -1.148755 |
| C | -4.683474 | 0.531852  | -0.254342 |
| C | -3.950625 | -0.238316 | 0.682064  |
| C | -2.511621 | -0.181682 | 0.669354  |
| C | -0.142399 | -3.116128 | -0.169215 |
| C | -1.825241 | -0.856689 | 1.702175  |
| C | -2.492588 | -1.609715 | 2.667343  |
| C | -3.895142 | -1.710133 | 2.638713  |
| C | -4.607613 | -1.032593 | 1.662704  |
| H | 1.279707  | 1.689643  | -1.313978 |
| C | 0.142463  | 3.116078  | -0.169144 |
| H | 0.050073  | -3.009032 | -2.947509 |
| H | 0.365036  | -1.272534 | -3.091034 |
| H | 2.551079  | -2.352568 | -3.149704 |
| H | 2.133618  | -3.430724 | -1.829171 |
| H | 5.775531  | -0.484211 | -0.245780 |
| H | 4.606966  | -1.969103 | -1.851676 |
| H | 5.699836  | 1.084658  | 1.641991  |
| H | 4.419809  | 2.306953  | 3.389185  |
| H | 1.920319  | 2.118033  | 3.447428  |
| H | 0.738858  | 0.778709  | 1.755612  |
| H | -2.133590 | 3.430801  | -1.828941 |
| H | -2.551136 | 2.352779  | -3.149572 |
| H | -0.050105 | 3.009119  | -2.947449 |
| H | -0.365121 | 1.272630  | -3.091024 |
| H | -4.606986 | 1.969134  | -1.851629 |
| H | -5.775539 | 0.484182  | -0.245759 |
| H | -0.738846 | -0.778786 | 1.755538  |
| H | -1.920293 | -2.118107 | 3.447367  |
| H | -4.419784 | -2.306985 | 3.389180  |
| H | -5.699829 | -1.084674 | 1.642001  |
| H | 0.796537  | 2.999889  | 0.704855  |
| H | -0.878672 | 3.297224  | 0.199492  |
| H | 0.470076  | 4.017505  | -0.714027 |
| H | 0.878734  | -3.297213 | 0.199451  |
| H | -0.469920 | -4.017544 | -0.714173 |
| H | -0.796518 | -3.000038 | 0.704759  |

*(M,M)*-cis-2

|   |           |          |          |
|---|-----------|----------|----------|
| C | -1.468659 | 2.805638 | 0.272701 |
| C | -2.989168 | 2.624285 | 0.136811 |



|   |           |           |           |
|---|-----------|-----------|-----------|
| C | -3.439943 | 1.345679  | 0.847132  |
| C | -2.794751 | 0.166328  | 0.165601  |
| C | -1.501047 | 0.295826  | -0.365070 |
| C | -0.691395 | 1.499979  | -0.043026 |
| C | -1.048224 | -0.732156 | -1.290015 |
| C | -1.802741 | -1.949788 | -1.417576 |
| C | -3.030342 | -2.088286 | -0.716695 |
| C | -3.533138 | -1.031465 | 0.003176  |
| C | -1.349271 | -2.978952 | -2.290281 |
| C | -0.230509 | -2.806929 | -3.074768 |
| C | 0.463297  | -1.575340 | -3.027958 |
| C | 0.067857  | -0.576822 | -2.160324 |
| C | 0.691346  | 1.500044  | 0.043084  |
| H | -1.164286 | 3.591306  | -0.434977 |
| C | 1.501070  | 0.295962  | 0.365115  |
| C | 2.794764  | 0.166509  | -0.165604 |
| C | 3.439866  | 1.345883  | -0.847193 |
| C | 2.989029  | 2.624489  | -0.136933 |
| C | 1.468498  | 2.805735  | -0.272766 |
| C | 3.533201  | -1.031250 | -0.003185 |
| C | 3.030446  | -2.088092 | 0.716695  |
| C | 1.802850  | -1.949637 | 1.417601  |
| C | 1.048290  | -0.732036 | 1.290050  |
| C | -1.160801 | 3.330535  | 1.696116  |
| C | -0.067814 | -0.576734 | 2.160336  |
| C | -0.463192 | -1.575237 | 3.028015  |
| C | 0.230693  | -2.806782 | 3.074870  |
| C | 1.349449  | -2.978784 | 2.290362  |
| H | 1.164095  | 3.591405  | 0.434889  |
| C | 1.160499  | 3.330516  | -1.696178 |
| H | -3.500391 | 3.507998  | 0.552472  |
| H | -3.276171 | 2.557169  | -0.925915 |
| H | -4.535433 | 1.236218  | 0.810606  |
| H | -3.176828 | 1.391562  | 1.919732  |
| H | -3.592910 | -3.021230 | -0.808345 |
| H | -4.518672 | -1.105525 | 0.471996  |
| H | -1.928529 | -3.904986 | -2.344725 |
| H | 0.102076  | -3.600038 | -3.749245 |
| H | 1.316365  | -1.407244 | -3.690414 |
| H | 0.605470  | 0.367548  | -2.162023 |
| H | 3.176732  | 1.391693  | -1.919793 |
| H | 4.535367  | 1.236507  | -0.810676 |
| H | 3.500188  | 3.508199  | -0.552671 |
| H | 3.276087  | 2.557443  | 0.925784  |
| H | 4.518725  | -1.105272 | -0.472034 |
| H | 3.593036  | -3.021020 | 0.808339  |
| H | -0.605488 | 0.367609  | 2.161983  |
| H | -1.316273 | -1.407163 | 3.690460  |
| H | -0.101847 | -3.599888 | 3.749375  |
| H | 1.928756  | -3.904785 | 2.344837  |
| H | 0.085519  | 3.412782  | -1.899698 |
| H | 1.579390  | 2.668541  | -2.469630 |
| H | 1.608882  | 4.327507  | -1.839146 |
| H | -1.579739 | 2.668606  | 2.469583  |
| H | -1.609224 | 4.327521  | 1.838968  |
| H | -0.085844 | 3.412835  | 1.899717  |

TS<sub>2</sub>

|   |          |           |           |
|---|----------|-----------|-----------|
| C | 1.960911 | -1.999529 | 1.031144  |
| C | 3.183845 | -2.390048 | 0.207206  |
| C | 4.032458 | -1.150590 | -0.002551 |
| C | 3.241230 | 0.142670  | -0.108617 |
| C | 1.830532 | 0.258611  | -0.100476 |

|   |           |           |           |
|---|-----------|-----------|-----------|
| C | 1.065774  | -1.023362 | 0.248305  |
| C | 1.312355  | 1.602582  | -0.399109 |
| C | 2.200907  | 2.741094  | -0.414541 |
| C | 3.599274  | 2.550368  | -0.290555 |
| C | 4.090480  | 1.280099  | -0.206254 |
| C | 1.701765  | 4.057236  | -0.616811 |
| C | 0.369813  | 4.290422  | -0.876358 |
| C | -0.496118 | 3.182729  | -0.969654 |
| C | -0.032909 | 1.900365  | -0.739597 |
| C | -0.213296 | -1.472163 | 0.000801  |
| H | 1.387196  | -2.897245 | 1.224574  |
| C | -1.459836 | -0.721929 | -0.371000 |
| C | -2.020240 | -1.004427 | -1.614063 |
| C | -1.241616 | -1.957800 | -2.481675 |
| C | -0.850114 | -3.214324 | -1.664451 |
| C | -0.706076 | -2.961084 | -0.129861 |
| C | -3.272181 | -0.453124 | -1.982632 |
| C | -3.979783 | 0.332138  | -1.098705 |
| C | -3.482553 | 0.579361  | 0.211235  |
| C | -2.208004 | 0.036112  | 0.595275  |
| C | 2.316880  | -1.457833 | 2.432354  |
| C | -1.742970 | 0.280743  | 1.918212  |
| C | -2.489586 | 1.020839  | 2.812061  |
| C | -3.740452 | 1.563989  | 2.428454  |
| C | -4.222254 | 1.346263  | 1.155392  |
| H | -1.728792 | -2.940228 | 0.278203  |
| C | -0.076334 | -4.211953 | 0.502823  |
| H | 3.766577  | -3.184252 | 0.704787  |
| H | 2.844784  | -2.801090 | -0.758472 |
| H | 4.661752  | -1.242571 | -0.905234 |
| H | 4.745779  | -1.039099 | 0.833012  |
| H | 4.265162  | 3.417080  | -0.309439 |
| H | 5.171289  | 1.114098  | -0.178626 |
| H | 2.416179  | 4.884740  | -0.588119 |
| H | -0.001197 | 5.305509  | -1.038658 |
| H | -1.546482 | 3.326733  | -1.234636 |
| H | -0.729192 | 1.090058  | -0.871555 |
| H | -0.322882 | -1.456796 | -2.830955 |
| H | -1.810365 | -2.237263 | -3.381642 |
| H | 0.102132  | -3.617895 | -2.047707 |
| H | -1.608157 | -4.002759 | -1.806071 |
| H | -3.676787 | -0.665115 | -2.976388 |
| H | -4.945428 | 0.757638  | -1.385307 |
| H | -0.776731 | -0.125531 | 2.218083  |
| H | -2.112258 | 1.193117  | 3.823374  |
| H | -4.320599 | 2.152883  | 3.143490  |
| H | -5.188646 | 1.758141  | 0.850978  |
| H | -0.033863 | -4.161061 | 1.600836  |
| H | 0.926471  | -4.447515 | 0.117829  |
| H | -0.721489 | -5.070479 | 0.249905  |
| H | 2.872505  | -0.509390 | 2.410839  |
| H | 2.929141  | -2.197466 | 2.975967  |
| H | 1.402484  | -1.288971 | 3.022817  |

(*M,P*)-*cis*-2

|   |           |          |           |
|---|-----------|----------|-----------|
| C | 2.007378  | 2.203963 | 0.778721  |
| C | 2.257606  | 3.014143 | -0.540298 |
| C | 1.715732  | 2.317617 | -1.805727 |
| C | 0.251556  | 2.025617 | -1.586636 |
| C | -0.094481 | 1.467818 | -0.355864 |
| C | 1.072693  | 1.024749 | 0.477284  |
| C | -1.464718 | 1.493011 | 0.065326  |
| C | -2.477099 | 1.880711 | -0.880695 |

|   |           |           |           |
|---|-----------|-----------|-----------|
| C | -2.087233 | 2.290993  | -2.184022 |
| C | -0.753596 | 2.408175  | -2.509347 |
| C | -3.839413 | 1.910483  | -0.467241 |
| C | -4.192289 | 1.647790  | 0.838746  |
| C | -3.188233 | 1.349861  | 1.793466  |
| C | -1.865527 | 1.265335  | 1.412791  |
| C | 1.411020  | -0.278383 | 0.674779  |
| H | 2.974062  | 1.800969  | 1.091737  |
| C | 0.806791  | -1.436852 | -0.078470 |
| C | 1.671389  | -1.971520 | -1.038814 |
| C | 3.065091  | -1.392965 | -1.150696 |
| C | 3.722892  | -1.141533 | 0.232140  |
| C | 2.684039  | -0.834214 | 1.347652  |
| C | 1.249995  | -3.046507 | -1.862160 |
| C | 0.005462  | -3.613728 | -1.704483 |
| C | -0.847712 | -3.189345 | -0.651563 |
| C | -0.427222 | -2.108847 | 0.201425  |
| C | 1.489619  | 3.115398  | 1.901942  |
| C | -1.222021 | -1.820008 | 1.345666  |
| C | -2.392270 | -2.503151 | 1.601442  |
| C | -2.843095 | -3.511707 | 0.714656  |
| C | -2.080977 | -3.848103 | -0.383116 |
| H | 2.351153  | -1.813028 | 1.730845  |
| C | 3.302927  | -0.137666 | 2.568014  |
| H | 1.765637  | 3.997883  | -0.463148 |
| H | 3.336889  | 3.211252  | -0.647838 |
| H | 2.283498  | 1.391641  | -1.995335 |
| H | 1.856362  | 2.960031  | -2.689046 |
| H | -2.861030 | 2.570128  | -2.904450 |
| H | -0.457876 | 2.803100  | -3.485607 |
| H | -4.602449 | 2.178680  | -1.203432 |
| H | -5.240200 | 1.692468  | 1.146168  |
| H | -3.465638 | 1.189541  | 2.838653  |
| H | -1.095570 | 1.055619  | 2.156256  |
| H | 3.011701  | -0.433761 | -1.690946 |
| H | 3.699748  | -2.049678 | -1.765329 |
| H | 4.428239  | -0.297750 | 0.144770  |
| H | 4.322273  | -2.017011 | 0.532413  |
| H | 1.930274  | -3.421774 | -2.632255 |
| H | -0.320384 | -4.429943 | -2.355049 |
| H | -0.871813 | -1.061584 | 2.042655  |
| H | -2.976843 | -2.264552 | 2.493531  |
| H | -3.781854 | -4.034366 | 0.915432  |
| H | -2.401122 | -4.649300 | -1.055255 |
| H | 2.529837  | 0.173661  | 3.287733  |
| H | 3.910858  | 0.744066  | 2.320426  |
| H | 3.971097  | -0.844872 | 3.086630  |
| H | 0.494072  | 3.520130  | 1.657677  |
| H | 2.169484  | 3.969841  | 2.056659  |
| H | 1.409776  | 2.571805  | 2.856588  |

TS<sub>3</sub>

|   |          |           |           |
|---|----------|-----------|-----------|
| C | 0.803958 | -2.843266 | -0.415348 |
| C | 1.101529 | -2.935799 | -1.947036 |
| C | 1.547740 | -1.602379 | -2.597512 |
| C | 2.155887 | -0.664384 | -1.589421 |
| C | 1.462291 | -0.496221 | -0.390309 |
| C | 0.312096 | -1.405772 | -0.131268 |
| C | 2.003312 | 0.361374  | 0.633754  |
| C | 3.224591 | 1.072384  | 0.368384  |
| C | 3.873728 | 0.901247  | -0.885236 |
| C | 3.355177 | 0.048083  | -1.834659 |
| C | 3.762551 | 1.930714  | 1.368607  |

|   |           |           |           |
|---|-----------|-----------|-----------|
| C | 3.136745  | 2.083694  | 2.586798  |
| C | 1.939839  | 1.376059  | 2.856060  |
| C | 1.389913  | 0.540050  | 1.905828  |
| C | -0.993011 | -1.155930 | 0.239105  |
| H | -0.010922 | -3.546610 | -0.233881 |
| C | -1.922546 | 0.019407  | -0.034077 |
| C | -3.307227 | -0.258702 | 0.067707  |
| C | -3.925649 | -1.648316 | 0.136656  |
| C | -2.923324 | -2.783832 | 0.292888  |
| C | -1.751087 | -2.213196 | 1.090956  |
| C | -4.277161 | 0.780200  | 0.089315  |
| C | -3.930382 | 2.098434  | -0.007001 |
| C | -2.584391 | 2.438590  | -0.294266 |
| C | -1.585609 | 1.401607  | -0.398904 |
| C | 2.025811  | -3.297680 | 0.404903  |
| C | -0.340305 | 1.823404  | -0.936517 |
| C | -0.051903 | 3.143324  | -1.231253 |
| C | -1.002700 | 4.158933  | -1.003224 |
| C | -2.253819 | 3.796886  | -0.556114 |
| H | -2.207267 | -1.574572 | 1.870021  |
| C | -1.001621 | -3.262419 | 1.926066  |
| H | 1.883350  | -3.698096 | -2.096283 |
| H | 0.203648  | -3.301631 | -2.468504 |
| H | 0.661294  | -1.109407 | -3.034671 |
| H | 2.241289  | -1.785556 | -3.432464 |
| H | 4.798342  | 1.451439  | -1.080242 |
| H | 3.867405  | -0.085553 | -2.791749 |
| H | 4.689914  | 2.468029  | 1.150917  |
| H | 3.561499  | 2.745712  | 3.345685  |
| H | 1.447418  | 1.494105  | 3.824773  |
| H | 0.465798  | 0.005110  | 2.123895  |
| H | -4.560454 | -1.781951 | -0.757267 |
| H | -4.622504 | -1.665221 | 0.993861  |
| H | -2.567231 | -3.154506 | -0.683392 |
| H | -3.389679 | -3.639870 | 0.808434  |
| H | -5.326815 | 0.499424  | 0.216021  |
| H | -4.680405 | 2.889766  | 0.071420  |
| H | 0.410661  | 1.085337  | -1.171242 |
| H | 0.925298  | 3.391285  | -1.653106 |
| H | -0.763518 | 5.204366  | -1.213606 |
| H | -3.037298 | 4.548834  | -0.426604 |
| H | -0.098745 | -2.847482 | 2.396256  |
| H | -0.715352 | -4.170134 | 1.377905  |
| H | -1.672436 | -3.588903 | 2.737838  |
| H | 2.926756  | -2.719331 | 0.151595  |
| H | 2.244371  | -4.358588 | 0.198357  |
| H | 1.858976  | -3.194968 | 1.486743  |

*(P,P)-cis-2*

|   |           |           |           |
|---|-----------|-----------|-----------|
| C | -1.493316 | 2.814738  | -0.088705 |
| C | -2.731251 | 2.665614  | -1.020079 |
| C | -2.643413 | 1.422690  | -1.917314 |
| C | -2.488342 | 0.213901  | -1.028825 |
| C | -1.534992 | 0.284852  | -0.010305 |
| C | -0.681380 | 1.509945  | -0.003868 |
| C | -1.469171 | -0.766086 | 0.969531  |
| C | -2.303583 | -1.925836 | 0.805444  |
| C | -3.201791 | -1.987682 | -0.293918 |
| C | -3.309717 | -0.931340 | -1.170215 |
| C | -2.238865 | -2.974754 | 1.766130  |
| C | -1.416473 | -2.881109 | 2.867446  |
| C | -0.629403 | -1.718938 | 3.059066  |
| C | -0.654568 | -0.694891 | 2.135153  |

|   |           |           |           |
|---|-----------|-----------|-----------|
| C | 0.682868  | 1.509365  | 0.003917  |
| H | -0.851463 | 3.585426  | -0.536102 |
| C | 1.535354  | 0.283492  | 0.010301  |
| C | 2.488558  | 0.211488  | 1.028875  |
| C | 2.644778  | 1.420134  | 1.917360  |
| C | 2.733989  | 2.662813  | 1.019913  |
| C | 1.495925  | 2.813493  | 0.089094  |
| C | 3.308803  | -0.934558 | 1.170207  |
| C | 3.199871  | -1.990713 | 0.293794  |
| C | 2.301769  | -1.927889 | -0.805593 |
| C | 1.468530  | -0.767284 | -0.969643 |
| C | -1.916408 | 3.306152  | 1.307218  |
| C | 0.654040  | -0.695204 | -2.135290 |
| C | 0.627913  | -1.719148 | -3.059284 |
| C | 1.413812  | -2.882125 | -2.867712 |
| C | 2.236049  | -2.976678 | -1.766363 |
| H | 0.854818  | 3.584356  | 0.537279  |
| C | 1.918979  | 3.305592  | -1.306574 |
| H | -3.646101 | 2.577546  | -0.410672 |
| H | -2.845859 | 3.578074  | -1.627927 |
| H | -1.782285 | 1.521824  | -2.604557 |
| H | -3.540761 | 1.329852  | -2.548799 |
| H | -3.828071 | -2.875809 | -0.415094 |
| H | -4.031587 | -0.969113 | -1.991121 |
| H | -2.869903 | -3.855795 | 1.618897  |
| H | -1.380656 | -3.691348 | 3.600183  |
| H | 0.001175  | -1.632301 | 3.947711  |
| H | -0.056475 | 0.199342  | 2.301635  |
| H | 3.541997  | 1.326445  | 2.548900  |
| H | 1.783689  | 1.520222  | 2.604515  |
| H | 3.648496  | 2.573295  | 0.410184  |
| H | 2.850183  | 3.575233  | 1.627533  |
| H | 4.030606  | -0.973116 | 1.991134  |
| H | 3.825270  | -2.879470 | 0.414912  |
| H | 0.056861  | 0.199646  | -2.301754 |
| H | -0.002521 | -1.631814 | -3.947960 |
| H | 1.377200  | -3.692283 | -3.600498 |
| H | 2.866193  | -3.858366 | -1.619159 |
| H | 1.047933  | 3.516412  | -1.946605 |
| H | 2.534647  | 2.547433  | -1.817327 |
| H | 2.516541  | 4.229599  | -1.231522 |
| H | -2.532945 | 2.548149  | 1.817156  |
| H | -2.513056 | 4.230797  | 1.232793  |
| H | -1.045329 | 3.515561  | 1.947691  |

(*P,P*)-*cis*-2\*

|   |           |           |           |
|---|-----------|-----------|-----------|
| C | 2.615139  | 1.977081  | 0.146836  |
| C | 2.201441  | 3.429488  | -0.200455 |
| C | 0.926485  | 3.476720  | -1.034829 |
| C | -0.177223 | 2.777367  | -0.289503 |
| C | 0.138347  | 1.543171  | 0.364904  |
| C | 1.442788  | 0.981711  | 0.106192  |
| C | -0.923992 | 0.875903  | 1.117055  |
| C | -2.283496 | 1.325582  | 0.963473  |
| C | -2.547119 | 2.477691  | 0.192230  |
| C | -1.496328 | 3.217112  | -0.367444 |
| C | -3.327531 | 0.607901  | 1.616867  |
| C | -3.048522 | -0.457403 | 2.454772  |
| C | -1.711229 | -0.836671 | 2.678149  |
| C | -0.674093 | -0.166984 | 2.029783  |
| C | 1.688062  | -0.398244 | -0.179834 |
| H | 3.367344  | 1.660005  | -0.593884 |
| C | 0.673619  | -1.381144 | -0.475180 |

|   |           |           |           |
|---|-----------|-----------|-----------|
| C | 0.864216  | -2.736637 | -0.010789 |
| C | 2.234575  | -3.256458 | 0.351012  |
| C | 3.192041  | -2.154489 | 0.795971  |
| C | 3.120498  | -0.940657 | -0.147803 |
| C | -0.244404 | -3.560612 | 0.168861  |
| C | -1.543016 | -3.151469 | -0.169850 |
| C | -1.746737 | -1.943510 | -0.866335 |
| C | -0.619298 | -1.077393 | -1.106554 |
| C | 3.286168  | 1.984591  | 1.541115  |
| C | -0.800962 | -0.006483 | -2.000711 |
| C | -2.055514 | 0.304601  | -2.532960 |
| C | -3.177735 | -0.476861 | -2.204734 |
| C | -3.024427 | -1.583400 | -1.387311 |
| H | 3.792374  | -0.183019 | 0.267211  |
| C | 3.632799  | -1.257960 | -1.566500 |
| H | 2.020983  | 3.996375  | 0.728350  |
| H | 3.036068  | 3.932221  | -0.716030 |
| H | 1.100082  | 2.971473  | -2.006036 |
| H | 0.636899  | 4.513336  | -1.269032 |
| H | -3.579704 | 2.817349  | 0.077748  |
| H | -1.718979 | 4.125056  | -0.935478 |
| H | -4.359427 | 0.934604  | 1.462202  |
| H | -3.860750 | -0.993131 | 2.952682  |
| H | -1.480898 | -1.651127 | 3.368928  |
| H | 0.357157  | -0.466579 | 2.218180  |
| H | 2.657587  | -3.760732 | -0.539275 |
| H | 2.151387  | -4.039770 | 1.121775  |
| H | 4.225231  | -2.538709 | 0.843727  |
| H | 2.929552  | -1.822195 | 1.815743  |
| H | -0.095780 | -4.548373 | 0.615261  |
| H | -2.394323 | -3.809532 | 0.022200  |
| H | 0.061227  | 0.602267  | -2.275407 |
| H | -2.157328 | 1.152221  | -3.214593 |
| H | -4.161315 | -0.221201 | -2.607337 |
| H | -3.879054 | -2.225436 | -1.157256 |
| H | 3.651849  | -0.348772 | -2.188397 |
| H | 2.992526  | -1.988937 | -2.083132 |
| H | 4.658919  | -1.662122 | -1.530244 |
| H | 2.557302  | 2.295166  | 2.306551  |
| H | 4.124205  | 2.702194  | 1.558569  |
| H | 3.679555  | 1.002099  | 1.838409  |

*(M,M)-trans-1*

|   |           |           |           |
|---|-----------|-----------|-----------|
| C | 0.292685  | -1.962192 | -0.867619 |
| C | -0.772025 | -3.039404 | -1.168958 |
| C | -1.919742 | -2.459744 | -2.002939 |
| C | -2.623188 | -1.449536 | -1.137979 |
| C | -1.840619 | -0.605690 | -0.338361 |
| C | -0.362181 | -0.586973 | -0.539677 |
| C | -2.503411 | 0.163402  | 0.696608  |
| C | -3.941765 | 0.189076  | 0.744516  |
| C | -4.685418 | -0.587947 | -0.182704 |
| C | -4.036384 | -1.416982 | -1.068557 |
| C | -4.603894 | 0.959561  | 1.742739  |
| C | -3.893779 | 1.649739  | 2.699754  |
| C | -2.480076 | 1.579608  | 2.699892  |
| C | -1.810919 | 0.863711  | 1.727279  |
| C | 0.362239  | 0.588188  | -0.538490 |
| H | 0.865027  | -2.310928 | 0.006272  |
| C | 1.840666  | 0.606498  | -0.337063 |
| C | 2.623281  | 1.452066  | -1.134814 |
| C | 1.919880  | 2.464057  | -1.997729 |
| C | 0.772068  | 3.041943  | -1.162654 |

|   |           |           |           |
|---|-----------|-----------|-----------|
| C | -0.292632 | 1.964068  | -0.863613 |
| C | 4.036474  | 1.419391  | -1.065339 |
| C | 4.685451  | 0.588466  | -0.181215 |
| C | 3.941735  | -0.190608 | 0.744234  |
| C | 2.503387  | -0.164865 | 0.696250  |
| C | 1.267504  | -1.898711 | -2.061477 |
| C | 1.810804  | -0.867550 | 1.725239  |
| C | 2.479885  | -1.585589 | 2.696324  |
| C | 3.893593  | -1.655631 | 2.696206  |
| C | 4.603786  | -0.963288 | 1.740811  |
| H | -0.865022 | 2.310976  | 0.010971  |
| C | -1.267422 | 1.903009  | -2.057624 |
| H | -0.289516 | -3.882078 | -1.689122 |
| H | -1.194276 | -3.443703 | -0.234031 |
| H | -2.625187 | -3.243495 | -2.320470 |
| H | -1.522637 | -2.000360 | -2.926386 |
| H | -5.777681 | -0.552125 | -0.149860 |
| H | -4.610699 | -2.064745 | -1.737023 |
| H | -5.697401 | 0.976181  | 1.744307  |
| H | -4.414304 | 2.230370  | 3.465454  |
| H | -1.910928 | 2.090761  | 3.480692  |
| H | -0.723497 | 0.818448  | 1.758533  |
| H | 1.522865  | 2.006589  | -2.922165 |
| H | 2.625327  | 3.248489  | -2.313565 |
| H | 0.289576  | 3.885677  | -1.681111 |
| H | 1.194240  | 3.444326  | -0.226865 |
| H | 4.610833  | 2.068594  | -1.732369 |
| H | 5.777712  | 0.552588  | -0.148360 |
| H | 0.723371  | -0.822451 | 1.756435  |
| H | 1.910670  | -2.098542 | 3.475894  |
| H | 4.414059  | -2.237954 | 3.460659  |
| H | 5.697294  | -0.979874 | 1.742457  |
| H | -0.747487 | 1.601008  | -2.981596 |
| H | -1.706980 | 2.898535  | -2.230142 |
| H | -2.094777 | 1.202200  | -1.901795 |
| H | 0.747622  | -1.594704 | -2.984822 |
| H | 1.706974  | -2.893912 | -2.236092 |
| H | 2.094920  | -1.198316 | -1.904145 |

TS<sub>5</sub>

|   |           |           |           |
|---|-----------|-----------|-----------|
| C | -0.415552 | -0.957143 | 1.631675  |
| C | -0.473996 | -2.449257 | 1.316858  |
| C | 0.932755  | -2.989702 | 1.166065  |
| C | 1.921324  | -2.011141 | 0.562903  |
| C | 1.631107  | -0.691944 | 0.127495  |
| C | 0.326470  | -0.085654 | 0.582749  |
| C | 2.793249  | 0.039291  | -0.413417 |
| C | 4.132394  | -0.460875 | -0.276768 |
| C | 4.335834  | -1.769186 | 0.233243  |
| C | 3.247260  | -2.532984 | 0.546296  |
| C | 5.237946  | 0.298647  | -0.749546 |
| C | 5.055838  | 1.467647  | -1.457162 |
| C | 3.739513  | 1.876630  | -1.756742 |
| C | 2.658803  | 1.173428  | -1.256267 |
| C | -0.466048 | 0.979963  | 0.117908  |
| H | -1.444241 | -0.588643 | 1.705307  |
| C | -1.943276 | 0.831754  | -0.024122 |
| C | -2.791067 | 1.818670  | 0.497608  |
| C | -2.166249 | 3.105202  | 0.960966  |
| C | -1.098049 | 3.474078  | -0.069020 |
| C | 0.045490  | 2.431044  | -0.112971 |
| C | -4.192849 | 1.628806  | 0.543999  |
| C | -4.769979 | 0.473241  | 0.068604  |

|   |           |           |           |
|---|-----------|-----------|-----------|
| C | -3.972930 | -0.515607 | -0.568262 |
| C | -2.547737 | -0.336212 | -0.635726 |
| C | 0.220003  | -0.679963 | 3.015000  |
| C | -1.813265 | -1.255318 | -1.439948 |
| C | -2.427588 | -2.317781 | -2.073601 |
| C | -3.817842 | -2.537800 | -1.925550 |
| C | -4.571034 | -1.648102 | -1.191117 |
| H | 0.488412  | 2.548502  | -1.112076 |
| C | 1.100508  | 2.820683  | 0.940112  |
| H | -1.014336 | -2.989396 | 2.112671  |
| H | -1.045746 | -2.603441 | 0.393632  |
| H | 0.941750  | -3.912206 | 0.558243  |
| H | 1.331486  | -3.294522 | 2.149841  |
| H | 5.351182  | -2.165170 | 0.317865  |
| H | 3.389492  | -3.565068 | 0.879600  |
| H | 6.243419  | -0.096375 | -0.579391 |
| H | 5.912815  | 2.034452  | -1.829377 |
| H | 3.567857  | 2.738605  | -2.406885 |
| H | 1.665417  | 1.465182  | -1.569581 |
| H | -1.707515 | 2.991926  | 1.960570  |
| H | -2.930100 | 3.893376  | 1.052213  |
| H | -0.659257 | 4.461388  | 0.148586  |
| H | -1.584716 | 3.554394  | -1.054978 |
| H | -4.815387 | 2.412488  | 0.985221  |
| H | -5.851246 | 0.323614  | 0.131648  |
| H | -0.743279 | -1.099010 | -1.572268 |
| H | -1.834643 | -2.991090 | -2.698088 |
| H | -4.292506 | -3.392280 | -2.414589 |
| H | -5.653042 | -1.779560 | -1.101500 |
| H | 0.632564  | 2.913162  | 1.934379  |
| H | 1.556323  | 3.792216  | 0.689377  |
| H | 1.906266  | 2.083557  | 1.028078  |
| H | 1.284598  | -0.956977 | 3.057829  |
| H | -0.311289 | -1.250049 | 3.795833  |
| H | 0.149527  | 0.388423  | 3.270250  |

(*M,P*)-*trans*-1

|   |           |           |           |
|---|-----------|-----------|-----------|
| C | 0.242235  | 1.366765  | 1.330165  |
| C | -0.014659 | 2.864550  | 0.953971  |
| C | -0.774540 | 3.036250  | -0.379881 |
| C | -1.971439 | 2.119645  | -0.394602 |
| C | -1.744495 | 0.787622  | -0.046677 |
| C | -0.312977 | 0.448527  | 0.231721  |
| C | -2.860678 | -0.088867 | 0.163968  |
| C | -4.186061 | 0.387129  | -0.128722 |
| C | -4.361646 | 1.725794  | -0.572622 |
| C | -3.283261 | 2.577038  | -0.674104 |
| C | -5.296035 | -0.485127 | 0.060623  |
| C | -5.124235 | -1.760823 | 0.552486  |
| C | -3.824580 | -2.217039 | 0.887182  |
| C | -2.726716 | -1.404192 | 0.694918  |
| C | 0.455687  | -0.453307 | -0.432322 |
| H | 1.324096  | 1.210998  | 1.400299  |
| C | 1.872634  | -0.783072 | -0.048451 |
| C | 2.084985  | -2.118044 | 0.299069  |
| C | 0.892378  | -3.043611 | 0.250275  |
| C | 0.083104  | -2.870395 | -1.058662 |
| C | 0.079420  | -1.401525 | -1.583373 |
| C | 3.379809  | -2.569561 | 0.658917  |
| C | 4.456710  | -1.711306 | 0.641568  |
| C | 4.300959  | -0.367058 | 0.207991  |
| C | 2.995314  | 0.103049  | -0.170919 |
| C | -0.350584 | 1.017139  | 2.706689  |



TS<sub>6</sub>

|   |           |           |           |
|---|-----------|-----------|-----------|
| C | 2.889554  | 1.424118  | -0.695942 |
| C | 3.992093  | 2.246483  | -0.801251 |
| C | 5.268247  | 1.795293  | -0.380779 |
| C | 5.414556  | 0.514987  | 0.107226  |
| H | 0.950747  | -1.320106 | -2.256740 |
| C | -1.137622 | -1.097099 | -2.460766 |
| H | -0.606282 | 3.345455  | 1.749940  |
| H | 0.943229  | 3.406088  | 0.905555  |
| H | -0.102501 | 2.789268  | -1.220948 |
| H | -1.079526 | 4.085119  | -0.518989 |
| H | -5.371000 | 2.078971  | -0.800836 |
| H | -3.431370 | 3.618709  | -0.972984 |
| H | -6.296588 | -0.115269 | -0.180715 |
| H | -5.986409 | -2.416336 | 0.698920  |
| H | -3.693316 | -3.218960 | 1.304323  |
| H | -1.732198 | -1.759508 | 0.963276  |
| H | 0.234695  | -2.814047 | 1.107371  |
| H | 1.206098  | -4.091132 | 0.377274  |
| H | -0.953080 | -3.203207 | -0.888511 |
| H | 0.496937  | -3.525935 | -1.842163 |
| H | 3.515089  | -3.614078 | 0.953970  |
| H | 5.451008  | -2.061662 | 0.931725  |
| H | 1.914664  | 1.775816  | -1.033719 |
| H | 3.882921  | 3.251831  | -1.216545 |
| H | 6.133591  | 2.458362  | -0.458517 |
| H | 6.398541  | 0.148809  | 0.413591  |
| H | -1.108746 | -1.747299 | -3.351140 |
| H | -1.132355 | -0.053852 | -2.810773 |
| H | -2.092213 | -1.279608 | -1.952810 |
| H | -1.446764 | 1.128286  | 2.718115  |
| H | 0.062435  | 1.682581  | 3.482800  |
| H | -0.110662 | -0.019483 | 2.992064  |

|   |           |           |           |
|---|-----------|-----------|-----------|
| C | 0.084552  | 2.153874  | 0.217970  |
| C | -0.554903 | 3.224882  | -0.734301 |
| C | -1.545303 | 2.648809  | -1.759557 |
| C | -2.460687 | 1.678729  | -1.065225 |
| C | -1.847472 | 0.704883  | -0.278038 |
| C | -0.354999 | 0.738283  | -0.177058 |
| C | -2.660256 | -0.187956 | 0.506626  |
| C | -4.092333 | -0.119083 | 0.376909  |
| C | -4.667433 | 0.845650  | -0.494168 |
| C | -3.870198 | 1.736119  | -1.179506 |
| C | -4.906514 | -1.004372 | 1.139772  |
| C | -4.348911 | -1.904062 | 2.021659  |
| C | -2.942244 | -1.947454 | 2.184443  |
| C | -2.124212 | -1.116195 | 1.446447  |
| C | 0.425857  | -0.357707 | -0.477140 |
| H | 1.159829  | 2.231624  | 0.062513  |
| C | 1.868142  | -0.715004 | -0.136574 |
| C | 2.181838  | -2.087488 | -0.291181 |
| C | 1.109066  | -3.151413 | -0.164061 |
| C | -0.167430 | -2.839657 | -0.957464 |
| C | -0.099443 | -1.414435 | -1.506850 |
| C | 3.514053  | -2.527404 | -0.487952 |
| C | 4.564720  | -1.644433 | -0.493118 |
| C | 4.342105  | -0.312511 | -0.062325 |
| C | 3.000908  | 0.128629  | 0.246137  |
| C | -0.242621 | 2.483973  | 1.686645  |
| C | 2.926791  | 1.313769  | 1.034934  |
| C | 4.029904  | 2.097905  | 1.316581  |
| C | 5.307601  | 1.749030  | 0.826575  |

|   |           |           |           |
|---|-----------|-----------|-----------|
| C | 5.453875  | 0.545751  | 0.174053  |
| H | 0.744498  | -1.422084 | -2.220595 |
| C | -1.315679 | -1.123434 | -2.393936 |
| H | -1.086988 | 3.972824  | -0.124825 |
| H | 0.247453  | 3.765200  | -1.261465 |
| H | -0.984254 | 2.129490  | -2.557373 |
| H | -2.113798 | 3.456106  | -2.247018 |
| H | -5.755669 | 0.884843  | -0.593533 |
| H | -4.321882 | 2.492792  | -1.827333 |
| H | -5.992058 | -0.947407 | 1.019358  |
| H | -4.986853 | -2.572943 | 2.604892  |
| H | -2.501725 | -2.641155 | 2.905416  |
| H | -1.044523 | -1.152433 | 1.589786  |
| H | 0.870211  | -3.229682 | 0.911546  |
| H | 1.526564  | -4.129966 | -0.445216 |
| H | -1.065088 | -2.966912 | -0.333448 |
| H | -0.274242 | -3.536536 | -1.805284 |
| H | 3.687637  | -3.590558 | -0.675433 |
| H | 5.579718  | -1.970362 | -0.734356 |
| H | 1.993779  | 1.566813  | 1.518499  |
| H | 3.910588  | 2.980662  | 1.950409  |
| H | 6.171634  | 2.389243  | 1.020609  |
| H | 6.444564  | 0.196291  | -0.130143 |
| H | -1.299832 | -1.847013 | -3.226627 |
| H | -1.282035 | -0.119259 | -2.836067 |
| H | -2.279105 | -1.244587 | -1.883002 |
| H | -1.331212 | 2.481509  | 1.853465  |
| H | 0.136149  | 3.483646  | 1.956933  |
| H | 0.193978  | 1.753783  | 2.386504  |

B3LYP/SVP in hexane

(*P,P*)-*trans*-1

|   |           |           |           |
|---|-----------|-----------|-----------|
| C | -0.081173 | -0.482994 | 1.980906  |
| C | 0.503614  | -1.805931 | 2.584369  |
| C | 1.461292  | -2.550305 | 1.631964  |
| C | 2.435797  | -1.585425 | 1.004045  |
| C | 1.901751  | -0.419694 | 0.451275  |
| C | 0.413112  | -0.312857 | 0.540278  |
| C | 2.778425  | 0.585410  | -0.078737 |
| C | 4.194322  | 0.330659  | -0.107706 |
| C | 4.690820  | -0.893410 | 0.417759  |
| C | 3.833940  | -1.817286 | 0.975435  |
| C | 5.067838  | 1.321481  | -0.640712 |
| C | 4.581210  | 2.524767  | -1.104584 |
| C | 3.190774  | 2.793247  | -1.045869 |
| C | 2.316382  | 1.848710  | -0.548592 |
| C | -0.413123 | -0.312908 | -0.540301 |
| H | -1.175122 | -0.573122 | 1.954415  |
| C | -1.901761 | -0.419718 | -0.451264 |
| C | -2.435833 | -1.585493 | -1.003918 |
| C | -1.461354 | -2.550441 | -1.631773 |
| C | -0.503709 | -1.806151 | -2.584273 |
| C | 0.081149  | -0.483197 | -1.980916 |
| C | -3.833979 | -1.817329 | -0.975263 |
| C | -4.690835 | -0.893390 | -0.417651 |
| C | -4.194307 | 0.330712  | 0.107708  |
| C | -2.778407 | 0.585437  | 0.078693  |
| C | 0.272617  | 0.720938  | 2.870915  |
| C | -2.316330 | 1.848758  | 0.548462  |
| C | -3.190697 | 2.793346  | 1.045687  |
| C | -4.581138 | 2.524898  | 1.104437  |
| C | -5.067796 | 1.321589  | 0.640658  |
| H | 1.175094  | -0.573380 | -1.954416 |
| C | -0.272587 | 0.720669  | -2.871037 |
| H | 1.051900  | -1.568604 | 3.510419  |
| H | -0.318735 | -2.479972 | 2.872554  |
| H | 0.869825  | -3.041262 | 0.838055  |
| H | 1.992106  | -3.352209 | 2.168496  |
| H | 5.767649  | -1.081890 | 0.390045  |
| H | 4.228129  | -2.745437 | 1.399407  |
| H | 6.140927  | 1.111639  | -0.666458 |
| H | 5.264396  | 3.277436  | -1.506505 |
| H | 2.810300  | 3.757246  | -1.393888 |
| H | 1.249333  | 2.066970  | -0.498066 |
| H | -1.992189 | -3.352389 | -2.168218 |
| H | -0.869864 | -3.041332 | -0.837840 |
| H | -1.052049 | -1.568858 | -3.510299 |
| H | 0.318606  | -2.480227 | -2.872475 |
| H | -4.228191 | -2.745511 | -1.399145 |
| H | -5.767665 | -1.081852 | -0.389901 |
| H | -1.249277 | 2.066990  | 0.497911  |
| H | -2.810198 | 3.757359  | 1.393638  |
| H | -5.264302 | 3.277608  | 1.506318  |
| H | -6.140888 | 1.111768  | 0.666437  |
| H | 0.103296  | 0.565444  | -3.896059 |
| H | 0.171774  | 1.654754  | -2.496113 |
| H | -1.363245 | 0.866603  | -2.936027 |
| H | 1.363281  | 0.866825  | 2.935904  |
| H | -0.103288 | 0.565832  | 3.895947  |
| H | -0.171692 | 1.655009  | 2.495893  |

*(P,P)*-trans-1\*

|   |           |           |           |
|---|-----------|-----------|-----------|
| C | -0.178418 | -1.872449 | -1.190962 |
| C | 0.604461  | -2.115044 | -2.500650 |
| C | 2.081713  | -2.368600 | -2.204030 |
| C | 2.666955  | -1.428551 | -1.173054 |
| C | 1.828439  | -0.601603 | -0.348260 |
| C | 0.406607  | -0.594854 | -0.572243 |
| C | 2.478983  | 0.216426  | 0.681205  |
| C | 3.917042  | 0.276007  | 0.746969  |
| C | 4.687001  | -0.497633 | -0.157041 |
| C | 4.061729  | -1.336202 | -1.073058 |
| C | 4.537390  | 1.075565  | 1.747330  |
| C | 3.789432  | 1.756343  | 2.693192  |
| C | 2.386393  | 1.655345  | 2.669453  |
| C | 1.755505  | 0.898802  | 1.683603  |
| C | -0.406619 | 0.595182  | -0.571952 |
| H | -1.226634 | -1.674705 | -1.456074 |
| C | -1.828448 | 0.601799  | -0.347939 |
| C | -2.666999 | 1.429106  | -1.172335 |
| C | -2.081796 | 2.369651  | -2.202880 |
| C | -0.604545 | 2.116265  | -2.499648 |
| C | 0.178368  | 1.873076  | -1.190090 |
| C | -4.061769 | 1.336661  | -1.072369 |
| C | -4.687003 | 0.497640  | -0.156740 |
| C | -3.917009 | -0.276403 | 0.746894  |
| C | -2.478952 | -0.216742 | 0.681144  |
| C | -0.143382 | -3.119899 | -0.286653 |
| C | -1.755435 | -0.899585 | 1.683196  |
| C | -2.386283 | -1.656625 | 2.668689  |
| C | -3.789319 | -1.757672 | 2.692403  |
| C | -4.537315 | -1.076461 | 1.746882  |
| H | 1.226583  | 1.675480  | -1.455316 |
| C | 0.143316  | 3.120107  | -0.285202 |
| H | 0.173595  | -2.971212 | -3.047033 |
| H | 0.494394  | -1.233479 | -3.154688 |
| H | 2.678705  | -2.319051 | -3.130208 |
| H | 2.205114  | -3.404674 | -1.835159 |
| H | 5.777959  | -0.447607 | -0.107667 |
| H | 4.673226  | -1.937131 | -1.753359 |
| H | 5.629721  | 1.127813  | 1.766474  |
| H | 4.285409  | 2.356513  | 3.460531  |
| H | 1.785003  | 2.168231  | 3.424363  |
| H | 0.667894  | 0.825526  | 1.697010  |
| H | -2.205214 | 3.405549  | -1.833521 |
| H | -2.678802 | 2.320519  | -3.129072 |
| H | -0.173707 | 2.972700  | -3.045636 |
| H | -0.494466 | 1.235013  | -3.154104 |
| H | -4.673294 | 1.937881  | -1.752388 |
| H | -5.777958 | 0.447552  | -0.107384 |
| H | -0.667826 | -0.826290 | 1.696612  |
| H | -1.784865 | -2.169860 | 3.423339  |
| H | -4.285267 | -2.358226 | 3.459461  |
| H | -5.629643 | -1.128759 | 1.766019  |
| H | 0.843069  | 3.023019  | 0.555096  |
| H | -0.856574 | 3.307993  | 0.134686  |
| H | 0.439710  | 4.013393  | -0.861042 |
| H | 0.856505  | -3.307986 | 0.133152  |
| H | -0.439783 | -4.012915 | -0.862907 |
| H | -0.843134 | -3.023194 | 0.553690  |

*(M,M)*-cis-2

|   |           |          |          |
|---|-----------|----------|----------|
| C | -1.459947 | 2.804360 | 0.294110 |
| C | -2.982415 | 2.635060 | 0.167710 |

|   |           |           |           |
|---|-----------|-----------|-----------|
| C | -3.439643 | 1.356642  | 0.873306  |
| C | -2.803424 | 0.174275  | 0.188525  |
| C | -1.511126 | 0.295871  | -0.349859 |
| C | -0.692184 | 1.495576  | -0.033939 |
| C | -1.072482 | -0.734743 | -1.279835 |
| C | -1.835149 | -1.948468 | -1.402566 |
| C | -3.058963 | -2.079930 | -0.693400 |
| C | -3.549683 | -1.019793 | 0.030099  |
| C | -1.392420 | -2.980640 | -2.277895 |
| C | -0.278038 | -2.814396 | -3.070309 |
| C | 0.421407  | -1.585666 | -3.030138 |
| C | 0.036982  | -0.584967 | -2.159649 |
| C | 0.692467  | 1.495450  | 0.033982  |
| H | -1.153957 | 3.591399  | -0.410913 |
| C | 1.511190  | 0.295583  | 0.349885  |
| C | 2.803465  | 0.173761  | -0.188501 |
| C | 3.439865  | 1.356023  | -0.873289 |
| C | 2.982898  | 2.634517  | -0.167665 |
| C | 1.460457  | 2.804118  | -0.294016 |
| C | 3.549528  | -1.020424 | -0.030081 |
| C | 3.058662  | -2.080475 | 0.693443  |
| C | 1.834845  | -1.948829 | 1.402572  |
| C | 1.072358  | -0.734989 | 1.279819  |
| C | -1.137477 | 3.317783  | 1.717942  |
| C | -0.037154 | -0.585093 | 2.159551  |
| C | -0.421792 | -1.585759 | 3.029980  |
| C | 0.277480  | -2.814588 | 3.070173  |
| C | 1.391898  | -2.980959 | 2.277839  |
| H | 1.154636  | 3.591174  | 0.411064  |
| C | 1.138096  | 3.317683  | -1.717819 |
| H | -3.483717 | 3.519408  | 0.593823  |
| H | -3.278207 | 2.579001  | -0.893331 |
| H | -4.535726 | 1.253920  | 0.837120  |
| H | -3.175898 | 1.397296  | 1.945788  |
| H | -3.627522 | -3.009721 | -0.780513 |
| H | -4.532508 | -1.087880 | 0.505630  |
| H | -1.976494 | -3.904011 | -2.327605 |
| H | 0.046465  | -3.610006 | -3.746021 |
| H | 1.270152  | -1.421736 | -3.699368 |
| H | 0.578553  | 0.357281  | -2.166060 |
| H | 3.176062  | 1.396730  | -1.945756 |
| H | 4.535936  | 1.253124  | -0.837155 |
| H | 3.484367  | 3.518764  | -0.593795 |
| H | 3.278710  | 2.578396  | 0.893366  |
| H | 4.532338  | -1.088662 | -0.505620 |
| H | 3.627092  | -3.010343 | 0.780576  |
| H | -0.578575 | 0.357239  | 2.165959  |
| H | -1.270563 | -1.421729 | 3.699151  |
| H | -0.047184 | -3.610173 | 3.745836  |
| H | 1.975840  | -3.904412 | 2.327568  |
| H | 0.061132  | 3.378032  | -1.920592 |
| H | 1.568858  | 2.664331  | -2.492472 |
| H | 1.563958  | 4.324074  | -1.865950 |
| H | -1.568321 | 2.664456  | 2.492568  |
| H | -1.563138 | 4.324246  | 1.866162  |
| H | -0.060492 | 3.377910  | 1.920676  |

TS<sub>2</sub>

|   |          |           |           |
|---|----------|-----------|-----------|
| C | 1.926687 | -2.041540 | 1.016302  |
| C | 3.153662 | -2.436098 | 0.200040  |
| C | 4.025023 | -1.208500 | 0.026997  |
| C | 3.254242 | 0.095694  | -0.087350 |
| C | 1.844909 | 0.234803  | -0.089537 |

|   |           |           |           |
|---|-----------|-----------|-----------|
| C | 1.052391  | -1.036664 | 0.244408  |
| C | 1.353450  | 1.589722  | -0.387706 |
| C | 2.263247  | 2.712306  | -0.405617 |
| C | 3.657564  | 2.497319  | -0.273167 |
| C | 4.124024  | 1.218580  | -0.180021 |
| C | 1.790541  | 4.036597  | -0.619481 |
| C | 0.464223  | 4.294198  | -0.884924 |
| C | -0.423933 | 3.203491  | -0.967135 |
| C | 0.013324  | 1.913804  | -0.725388 |
| C | -0.235826 | -1.458713 | -0.008852 |
| H | 1.338495  | -2.934257 | 1.185982  |
| C | -1.472222 | -0.686936 | -0.378338 |
| C | -2.034049 | -0.956020 | -1.624767 |
| C | -1.265096 | -1.912532 | -2.497163 |
| C | -0.900350 | -3.181542 | -1.687563 |
| C | -0.755845 | -2.939652 | -0.151130 |
| C | -3.284737 | -0.397907 | -1.988439 |
| C | -3.992820 | 0.378487  | -1.097087 |
| C | -3.494376 | 0.614280  | 0.214563  |
| C | -2.218197 | 0.069014  | 0.592837  |
| C | 2.274966  | -1.533729 | 2.431462  |
| C | -1.749923 | 0.310753  | 1.915608  |
| C | -2.495283 | 1.046014  | 2.814907  |
| C | -3.749090 | 1.587068  | 2.437918  |
| C | -4.233584 | 1.374622  | 1.164911  |
| H | -1.779332 | -2.901856 | 0.252765  |
| C | -0.157844 | -4.206234 | 0.479709  |
| H | 3.716370  | -3.249471 | 0.689216  |
| H | 2.823697  | -2.821520 | -0.779022 |
| H | 4.677080  | -1.300138 | -0.859248 |
| H | 4.716870  | -1.114891 | 0.882583  |
| H | 4.339603  | 3.351422  | -0.292507 |
| H | 5.201365  | 1.032884  | -0.144466 |
| H | 2.521319  | 4.849851  | -0.594767 |
| H | 0.114142  | 5.315074  | -1.057898 |
| H | -1.471328 | 3.367856  | -1.232391 |
| H | -0.701833 | 1.117219  | -0.841003 |
| H | -0.336447 | -1.423677 | -2.837107 |
| H | -1.833489 | -2.174986 | -3.402271 |
| H | 0.043174  | -3.602728 | -2.072859 |
| H | -1.675185 | -3.952191 | -1.834980 |
| H | -3.690050 | -0.600910 | -2.983826 |
| H | -4.959053 | 0.805690  | -1.379314 |
| H | -0.780947 | -0.092022 | 2.211751  |
| H | -2.114638 | 1.215962  | 3.825505  |
| H | -4.328626 | 2.171160  | 3.157574  |
| H | -5.201055 | 1.786690  | 0.864157  |
| H | -0.117389 | -4.159618 | 1.578279  |
| H | 0.838484  | -4.471516 | 0.096950  |
| H | -0.825099 | -5.047813 | 0.225900  |
| H | 2.837465  | -0.588700 | 2.439880  |
| H | 2.877964  | -2.288954 | 2.964562  |
| H | 1.357967  | -1.372672 | 3.020575  |

(*M,P*)-*cis*-2

|   |           |           |           |
|---|-----------|-----------|-----------|
| C | 1.997133  | -2.197224 | -0.812234 |
| C | 2.234991  | -3.051623 | 0.478710  |
| C | 1.711239  | -2.380659 | 1.764397  |
| C | 0.248032  | -2.072529 | 1.562117  |
| C | -0.104270 | -1.482564 | 0.346961  |
| C | 1.060896  | -1.024642 | -0.483112 |
| C | -1.478810 | -1.495388 | -0.064064 |
| C | -2.485696 | -1.909147 | 0.877767  |

|   |           |           |           |
|---|-----------|-----------|-----------|
| C | -2.088103 | -2.354719 | 2.167328  |
| C | -0.752217 | -2.480089 | 2.480117  |
| C | -3.850960 | -1.929177 | 0.472500  |
| C | -4.212677 | -1.633894 | -0.824189 |
| C | -3.214726 | -1.311878 | -1.777350 |
| C | -1.889547 | -1.234071 | -1.402667 |
| C | 1.403247  | 0.280570  | -0.663841 |
| H | 2.966861  | -1.782502 | -1.099417 |
| C | 0.803750  | 1.435278  | 0.100440  |
| C | 1.667065  | 1.950812  | 1.073532  |
| C | 3.054141  | 1.357835  | 1.188921  |
| C | 3.719003  | 1.113021  | -0.192057 |
| C | 2.685004  | 0.839886  | -1.320218 |
| C | 1.251553  | 3.024455  | 1.902263  |
| C | 0.018137  | 3.613241  | 1.735209  |
| C | -0.829060 | 3.211530  | 0.668344  |
| C | -0.417248 | 2.129054  | -0.187314 |
| C | 1.498669  | -3.070339 | -1.973198 |
| C | -1.204246 | 1.862009  | -1.342752 |
| C | -2.356896 | 2.571088  | -1.609590 |
| C | -2.799358 | 3.582980  | -0.722405 |
| C | -2.046047 | 3.896033  | 0.388588  |
| H | 2.364123  | 1.830083  | -1.682947 |
| C | 3.306591  | 0.170136  | -2.553396 |
| H | 1.723677  | -4.023005 | 0.374629  |
| H | 3.310747  | -3.272784 | 0.574928  |
| H | 2.289015  | -1.464518 | 1.970683  |
| H | 1.851931  | -3.044239 | 2.631725  |
| H | -2.856974 | -2.653408 | 2.885265  |
| H | -0.449931 | -2.901387 | 3.443317  |
| H | -4.609184 | -2.216576 | 1.206531  |
| H | -5.262668 | -1.671996 | -1.125851 |
| H | -3.498645 | -1.125806 | -2.816650 |
| H | -1.125502 | -1.006322 | -2.146650 |
| H | 2.987693  | 0.395165  | 1.721148  |
| H | 3.690538  | 2.003576  | 1.813160  |
| H | 4.410077  | 0.257184  | -0.109541 |
| H | 4.334660  | 1.982705  | -0.475819 |
| H | 1.929019  | 3.383250  | 2.682718  |
| H | -0.302082 | 4.429563  | 2.388493  |
| H | -0.862444 | 1.099574  | -2.039738 |
| H | -2.934138 | 2.350585  | -2.511312 |
| H | -3.724553 | 4.126005  | -0.932568 |
| H | -2.360200 | 4.697705  | 1.063131  |
| H | 2.539825  | -0.096358 | -3.297707 |
| H | 3.893567  | -0.732651 | -2.331605 |
| H | 3.996994  | 0.881089  | -3.037480 |
| H | 0.503989  | -3.494979 | -1.760593 |
| H | 2.188079  | -3.913390 | -2.149844 |
| H | 1.427977  | -2.496463 | -2.910826 |

TS<sub>3</sub>

|   |          |           |           |
|---|----------|-----------|-----------|
| C | 0.824451 | -2.832901 | -0.420777 |
| C | 1.126475 | -2.923654 | -1.951260 |
| C | 1.576881 | -1.590631 | -2.599127 |
| C | 2.172215 | -0.648900 | -1.586829 |
| C | 1.470617 | -0.480990 | -0.391374 |
| C | 0.323968 | -1.397793 | -0.134987 |
| C | 2.005552 | 0.380606  | 0.634231  |
| C | 3.229376 | 1.091187  | 0.375628  |
| C | 3.887084 | 0.917473  | -0.873271 |
| C | 3.373497 | 0.063494  | -1.824553 |
| C | 3.759777 | 1.953640  | 1.376821  |

|   |           |           |           |
|---|-----------|-----------|-----------|
| C | 3.124633  | 2.111940  | 2.589689  |
| C | 1.925883  | 1.405211  | 2.852677  |
| C | 1.383539  | 0.564898  | 1.901543  |
| C | -0.983461 | -1.160541 | 0.239158  |
| H | 0.012128  | -3.539397 | -0.241497 |
| C | -1.926771 | 0.005454  | -0.030669 |
| C | -3.308921 | -0.286883 | 0.075934  |
| C | -3.913292 | -1.682636 | 0.140950  |
| C | -2.899288 | -2.807971 | 0.294764  |
| C | -1.730568 | -2.227082 | 1.090694  |
| C | -4.288347 | 0.743399  | 0.104625  |
| C | -3.956735 | 2.065228  | 0.001316  |
| C | -2.616281 | 2.418361  | -0.297184 |
| C | -1.607007 | 1.390717  | -0.400600 |
| C | 2.045547  | -3.285152 | 0.401098  |
| C | -0.364923 | 1.824324  | -0.936199 |
| C | -0.091515 | 3.145199  | -1.241314 |
| C | -1.055820 | 4.150825  | -1.025459 |
| C | -2.301947 | 3.778238  | -0.572317 |
| H | -2.191681 | -1.595346 | 1.872204  |
| C | -0.970709 | -3.270434 | 1.922971  |
| H | 1.908380  | -3.686532 | -2.097527 |
| H | 0.229878  | -3.288084 | -2.475748 |
| H | 0.695366  | -1.100601 | -3.049284 |
| H | 2.280993  | -1.773637 | -3.425141 |
| H | 4.813223  | 1.466819  | -1.063460 |
| H | 3.892170  | -0.072509 | -2.777898 |
| H | 4.688535  | 2.490693  | 1.163764  |
| H | 3.543393  | 2.777742  | 3.348773  |
| H | 1.425313  | 1.527618  | 3.816825  |
| H | 0.457788  | 0.031449  | 2.116048  |
| H | -4.544211 | -1.819398 | -0.755274 |
| H | -4.612685 | -1.709041 | 0.995492  |
| H | -2.543254 | -3.175930 | -0.682408 |
| H | -3.355927 | -3.667805 | 0.812448  |
| H | -5.334218 | 0.452496  | 0.239548  |
| H | -4.714925 | 2.848418  | 0.083180  |
| H | 0.397165  | 1.093453  | -1.157539 |
| H | 0.884288  | 3.402006  | -1.661542 |
| H | -0.829424 | 5.196998  | -1.246702 |
| H | -3.093942 | 4.522331  | -0.448819 |
| H | -0.074026 | -2.848115 | 2.398806  |
| H | -0.673807 | -4.175171 | 1.375278  |
| H | -1.638496 | -3.606159 | 2.733915  |
| H | 2.952863  | -2.720740 | 0.137974  |
| H | 2.255259  | -4.350741 | 0.208498  |
| H | 1.886402  | -3.168586 | 1.483001  |

(*P,P*)-*cis*-2

|   |          |           |           |
|---|----------|-----------|-----------|
| C | 1.485437 | 2.816693  | 0.091523  |
| C | 2.725328 | 2.675061  | 1.020930  |
| C | 2.651352 | 1.428177  | 1.912892  |
| C | 2.504100 | 0.222219  | 1.019661  |
| C | 1.542599 | 0.285210  | 0.006978  |
| C | 0.680317 | 1.505603  | 0.003313  |
| C | 1.478826 | -0.768769 | -0.970762 |
| C | 2.329618 | -1.918647 | -0.815539 |
| C | 3.242842 | -1.968091 | 0.271935  |
| C | 3.344272 | -0.911320 | 1.148613  |
| C | 2.258122 | -2.975614 | -1.767264 |
| C | 1.414428 | -2.898706 | -2.853776 |
| C | 0.614900 | -1.744352 | -3.040959 |
| C | 0.647094 | -0.712692 | -2.125459 |



|   |           |           |           |
|---|-----------|-----------|-----------|
| C | -0.685123 | 1.503653  | -0.003467 |
| H | 0.837576  | 3.578916  | 0.543354  |
| C | -1.543814 | 0.280737  | -0.006835 |
| C | -2.505212 | 0.214675  | -1.019423 |
| C | -2.656405 | 1.420121  | -1.912696 |
| C | -2.733855 | 2.666841  | -1.020815 |
| C | -1.493949 | 2.812440  | -0.092080 |
| C | -3.341648 | -0.921621 | -1.148389 |
| C | -3.236654 | -1.978127 | -0.271814 |
| C | -2.323491 | -1.925769 | 0.815574  |
| C | -1.476622 | -0.773015 | 0.970928  |
| C | 1.902611  | 3.324430  | -1.299671 |
| C | -0.645154 | -0.714204 | 2.125676  |
| C | -0.609551 | -1.745785 | 3.041141  |
| C | -1.405098 | -2.902858 | 2.853796  |
| C | -2.248498 | -2.982531 | 1.767259  |
| H | -0.848434 | 3.576204  | -0.544688 |
| C | -1.911905 | 3.319883  | 1.298983  |
| H | 3.641130  | 2.599922  | 0.411154  |
| H | 2.830570  | 3.585716  | 1.633241  |
| H | 1.792229  | 1.515731  | 2.604051  |
| H | 3.551942  | 1.340255  | 2.540256  |
| H | 3.882684  | -2.847528 | 0.385897  |
| H | 4.075464  | -0.940384 | 1.961701  |
| H | 2.898988  | -3.850155 | -1.623202 |
| H | 1.372114  | -3.715339 | -3.579241 |
| H | -0.031119 | -1.669685 | -3.919723 |
| H | 0.038407  | 0.174786  | -2.289467 |
| H | -3.556931 | 1.329399  | -2.539747 |
| H | -1.797782 | 1.510196  | -2.604151 |
| H | -3.649103 | 2.588872  | -0.410560 |
| H | -2.842265 | 3.577116  | -1.633136 |
| H | -4.072839 | -0.953001 | -1.961394 |
| H | -3.873570 | -2.859684 | -0.385799 |
| H | -0.039462 | 0.175304  | 2.289789  |
| H | 0.036133  | -1.668948 | 3.919961  |
| H | -1.360060 | -3.719387 | 3.579214  |
| H | -2.886390 | -3.859232 | 1.623127  |
| H | -1.040273 | 3.521152  | 1.941810  |
| H | -2.544908 | 2.580810  | 1.816770  |
| H | -2.490631 | 4.255624  | 1.215994  |
| H | 2.537835  | 2.586758  | -1.816735 |
| H | 2.478779  | 4.261780  | -1.217012 |
| H | 1.030704  | 3.522952  | -1.942978 |

(*P,P*)-*cis*-2\*

|   |           |           |           |
|---|-----------|-----------|-----------|
| C | 2.350291  | 2.238759  | -0.000251 |
| C | 1.798107  | 3.596199  | -0.512042 |
| C | 0.490223  | 3.435085  | -1.279172 |
| C | -0.509267 | 2.716474  | -0.416615 |
| C | -0.060523 | 1.559323  | 0.301423  |
| C | 1.291142  | 1.122653  | 0.050054  |
| C | -1.030193 | 0.859792  | 1.145433  |
| C | -2.422036 | 1.225874  | 1.073953  |
| C | -2.814893 | 2.312537  | 0.259031  |
| C | -1.859884 | 3.062572  | -0.433409 |
| C | -3.371792 | 0.506572  | 1.855508  |
| C | -2.973684 | -0.488766 | 2.730177  |
| C | -1.604624 | -0.789579 | 2.864070  |
| C | -0.659349 | -0.118504 | 2.091313  |
| C | 1.693614  | -0.242545 | -0.131817 |
| H | 3.152354  | 1.923559  | -0.685842 |
| C | 0.810300  | -1.346191 | -0.415001 |

|   |           |           |           |
|---|-----------|-----------|-----------|
| C | 1.142591  | -2.655512 | 0.106018  |
| C | 2.537364  | -2.987658 | 0.578960  |
| C | 3.333638  | -1.760803 | 1.010453  |
| C | 3.175637  | -0.613743 | -0.002630 |
| C | 0.145128  | -3.622043 | 0.229544  |
| C | -1.161178 | -3.412174 | -0.226534 |
| C | -1.476996 | -2.249555 | -0.963583 |
| C | -0.472333 | -1.228198 | -1.128137 |
| C | 2.977854  | 2.465030  | 1.395984  |
| C | -0.742394 | -0.200877 | -2.053442 |
| C | -1.973569 | -0.094382 | -2.704000 |
| C | -2.988246 | -1.036611 | -2.459233 |
| C | -2.740363 | -2.097505 | -1.604794 |
| H | 3.732036  | 0.237521  | 0.401162  |
| C | 3.799791  | -0.941403 | -1.373238 |
| H | 1.610286  | 4.265713  | 0.343741  |
| H | 2.561946  | 4.091069  | -1.133806 |
| H | 0.671788  | 2.849491  | -2.202450 |
| H | 0.093102  | 4.410741  | -1.600786 |
| H | -3.872507 | 2.584072  | 0.206399  |
| H | -2.180313 | 3.910723  | -1.045440 |
| H | -4.428464 | 0.773677  | 1.765844  |
| H | -3.714816 | -1.027218 | 3.326641  |
| H | -1.277736 | -1.548085 | 3.579680  |
| H | 0.396715  | -0.354954 | 2.220080  |
| H | 3.071999  | -3.488081 | -0.251613 |
| H | 2.493636  | -3.733253 | 1.389597  |
| H | 4.399866  | -2.017605 | 1.130292  |
| H | 2.979221  | -1.412735 | 1.996509  |
| H | 0.394245  | -4.569795 | 0.716354  |
| H | -1.923554 | -4.183594 | -0.089376 |
| H | 0.036299  | 0.529164  | -2.274215 |
| H | -2.142240 | 0.723822  | -3.408461 |
| H | -3.958287 | -0.942074 | -2.954444 |
| H | -3.504188 | -2.861316 | -1.434139 |
| H | 3.746149  | -0.073382 | -2.050041 |
| H | 3.287021  | -1.773898 | -1.878841 |
| H | 4.864121  | -1.211811 | -1.262447 |
| H | 2.206975  | 2.796113  | 2.110119  |
| H | 3.751141  | 3.250803  | 1.343829  |
| H | 3.447059  | 1.562406  | 1.813531  |

(*M,M*)-*trans*-1

|   |           |           |           |
|---|-----------|-----------|-----------|
| C | 0.290898  | -1.964869 | -0.863208 |
| C | -0.772468 | -3.044377 | -1.161602 |
| C | -1.922183 | -2.470020 | -1.995526 |
| C | -2.624672 | -1.454797 | -1.135640 |
| C | -1.842749 | -0.606283 | -0.339069 |
| C | -0.363089 | -0.587180 | -0.539641 |
| C | -2.507999 | 0.164469  | 0.693982  |
| C | -3.947026 | 0.189633  | 0.740547  |
| C | -4.689447 | -0.591538 | -0.184492 |
| C | -4.038388 | -1.422860 | -1.066725 |
| C | -4.610696 | 0.963408  | 1.735607  |
| C | -3.901759 | 1.655213  | 2.692647  |
| C | -2.488149 | 1.583689  | 2.695918  |
| C | -1.817417 | 0.866306  | 1.725166  |
| C | 0.363120  | 0.587822  | -0.539040 |
| H | 0.862459  | -2.309938 | 0.012424  |
| C | 1.842781  | 0.606726  | -0.338385 |
| C | 2.624733  | 1.456106  | -1.134003 |
| C | 1.922259  | 2.472193  | -1.992886 |
| C | 0.772496  | 3.045682  | -1.158432 |

|   |           |           |           |
|---|-----------|-----------|-----------|
| C | -0.290869 | 1.965840  | -0.861178 |
| C | 4.038447  | 1.424102  | -1.065060 |
| C | 4.689470  | 0.591814  | -0.183710 |
| C | 3.947013  | -0.190405 | 0.740415  |
| C | 2.507988  | -0.165203 | 0.693810  |
| C | 1.266791  | -1.907590 | -2.055402 |
| C | 1.817353  | -0.868274 | 1.724120  |
| C | 2.488043  | -1.586768 | 2.694077  |
| C | 3.901658  | -1.658243 | 2.690815  |
| C | 4.610639  | -0.965319 | 1.734618  |
| H | -0.862435 | 2.310000  | 0.014806  |
| C | -1.266774 | 1.909772  | -2.053423 |
| H | -0.288962 | -3.886403 | -1.682034 |
| H | -1.191980 | -3.449873 | -0.225899 |
| H | -2.628042 | -3.256434 | -2.305227 |
| H | -1.528137 | -2.017975 | -2.923809 |
| H | -5.781825 | -0.557458 | -0.152495 |
| H | -4.611583 | -2.073882 | -1.733120 |
| H | -5.704276 | 0.980918  | 1.734799  |
| H | -4.423350 | 2.237828  | 3.456298  |
| H | -1.920084 | 2.095867  | 3.476977  |
| H | -0.730169 | 0.820974  | 1.759103  |
| H | 1.528243  | 2.021075  | -2.921630 |
| H | 2.628111  | 3.258933  | -2.301775 |
| H | 0.288998  | 3.888228  | -1.678026 |
| H | 1.191966  | 3.450244  | -0.222307 |
| H | 4.611668  | 2.075845  | -1.730726 |
| H | 5.781847  | 0.557701  | -0.151705 |
| H | 0.730098  | -0.823023 | 1.758025  |
| H | 1.919944  | -2.099879 | 3.474498  |
| H | 4.423215  | -2.241738 | 3.453816  |
| H | 5.704219  | -0.982818 | 1.733851  |
| H | -0.749395 | 1.619016  | -2.982653 |
| H | -1.713864 | 2.903890  | -2.216504 |
| H | -2.091606 | 1.204393  | -1.903700 |
| H | 0.749439  | -1.615795 | -2.984322 |
| H | 1.713817  | -2.901563 | -2.219554 |
| H | 2.091664  | -1.202430 | -1.904911 |

TS<sub>5</sub>

|   |           |           |           |
|---|-----------|-----------|-----------|
| C | -0.339980 | -0.878547 | 1.586353  |
| C | -0.324093 | -2.418457 | 1.506798  |
| C | 0.533943  | -2.885203 | 0.338529  |
| C | 1.774706  | -2.041774 | 0.170718  |
| C | 1.716914  | -0.625137 | 0.106231  |
| C | 0.306068  | -0.098534 | 0.403520  |
| C | 2.984828  | 0.044680  | -0.218027 |
| C | 4.207141  | -0.729090 | -0.316831 |
| C | 4.181919  | -2.134960 | -0.165547 |
| C | 2.986382  | -2.764694 | 0.044086  |
| C | 5.457354  | -0.103224 | -0.590664 |
| C | 5.558843  | 1.251441  | -0.801618 |
| C | 4.378763  | 2.021532  | -0.750660 |
| C | 3.159543  | 1.435790  | -0.470369 |
| C | -0.465840 | 0.957467  | -0.083383 |
| H | -1.379021 | -0.548104 | 1.668646  |
| C | -1.962609 | 0.865364  | -0.074056 |
| C | -2.760505 | 1.989822  | 0.200000  |
| C | -2.167300 | 3.372392  | 0.118320  |
| C | -1.016951 | 3.339105  | -0.887910 |
| C | 0.077145  | 2.359142  | -0.430669 |
| C | -4.152971 | 1.850316  | 0.434676  |
| C | -4.788797 | 0.638531  | 0.311015  |

|   |           |           |           |
|---|-----------|-----------|-----------|
| C | -4.078606 | -0.472290 | -0.219696 |
| C | -2.667902 | -0.345647 | -0.473248 |
| C | 0.351135  | -0.389468 | 2.879997  |
| C | -2.056664 | -1.381963 | -1.232257 |
| C | -2.755113 | -2.505937 | -1.631202 |
| C | -4.110843 | -2.676491 | -1.266737 |
| C | -4.757555 | -1.669943 | -0.581807 |
| H | 0.798223  | 2.279184  | -1.256662 |
| C | 0.760190  | 2.972192  | 0.820908  |
| H | 0.077859  | -2.835389 | 2.444898  |
| H | -1.346900 | -2.811924 | 1.400930  |
| H | -0.054983 | -2.830367 | -0.588078 |
| H | 0.816260  | -3.942186 | 0.455017  |
| H | 5.114499  | -2.700199 | -0.239984 |
| H | 2.948085  | -3.854129 | 0.122537  |
| H | 6.344188  | -0.741028 | -0.640679 |
| H | 6.523469  | 1.718267  | -1.015664 |
| H | 4.418666  | 3.098068  | -0.937726 |
| H | 2.305711  | 2.084567  | -0.462418 |
| H | -1.822726 | 3.741386  | 1.099933  |
| H | -2.951332 | 4.075872  | -0.205320 |
| H | -0.571278 | 4.340028  | -1.008426 |
| H | -1.412115 | 3.041498  | -1.873441 |
| H | -4.721496 | 2.740453  | 0.720230  |
| H | -5.855214 | 0.538804  | 0.530299  |
| H | -1.020325 | -1.257204 | -1.539922 |
| H | -2.256234 | -3.265750 | -2.238707 |
| H | -4.649158 | -3.581590 | -1.559693 |
| H | -5.820761 | -1.757240 | -0.340679 |
| H | 0.013142  | 3.224290  | 1.587316  |
| H | 1.293220  | 3.903210  | 0.563479  |
| H | 1.472445  | 2.290758  | 1.298979  |
| H | 1.414372  | -0.676492 | 2.912874  |
| H | -0.144071 | -0.837870 | 3.757881  |
| H | 0.290610  | 0.704599  | 2.985565  |

(*M,P*)-*trans*-1

|   |           |           |           |
|---|-----------|-----------|-----------|
| C | 0.245611  | 1.369497  | 1.323792  |
| C | -0.018991 | 2.866973  | 0.953913  |
| C | -0.778864 | 3.041183  | -0.378565 |
| C | -1.974094 | 2.122275  | -0.393869 |
| C | -1.746539 | 0.788703  | -0.048429 |
| C | -0.313614 | 0.448246  | 0.227915  |
| C | -2.864334 | -0.087336 | 0.161758  |
| C | -4.190697 | 0.391305  | -0.125317 |
| C | -4.366432 | 1.731719  | -0.564272 |
| C | -3.287002 | 2.581588  | -0.666943 |
| C | -5.301219 | -0.481336 | 0.062068  |
| C | -5.129525 | -1.759122 | 0.548739  |
| C | -3.829699 | -2.217641 | 0.879261  |
| C | -2.731306 | -1.405124 | 0.687637  |
| C | 0.454367  | -0.457714 | -0.433457 |
| H | 1.328380  | 1.218090  | 1.384346  |
| C | 1.873222  | -0.784608 | -0.049103 |
| C | 2.088720  | -2.117561 | 0.306463  |
| C | 0.899653  | -3.047780 | 0.260364  |
| C | 0.090495  | -2.880673 | -1.048924 |
| C | 0.080479  | -1.414005 | -1.579830 |
| C | 3.384946  | -2.563075 | 0.670457  |
| C | 4.460422  | -1.702891 | 0.648896  |
| C | 4.301946  | -0.361255 | 0.207510  |
| C | 2.994927  | 0.103210  | -0.176106 |
| C | -0.328841 | 1.017659  | 2.706963  |

|   |           |           |           |
|---|-----------|-----------|-----------|
| C | 2.886684  | 1.421868  | -0.707359 |
| C | 3.987088  | 2.247072  | -0.814815 |
| C | 5.263958  | 1.801410  | -0.390454 |
| C | 5.413514  | 0.523697  | 0.103620  |
| H | 0.950205  | -1.333001 | -2.255116 |
| C | -1.137031 | -1.122869 | -2.459785 |
| H | -0.612802 | 3.341775  | 1.751978  |
| H | 0.936022  | 3.413625  | 0.908290  |
| H | -0.106112 | 2.800328  | -1.220644 |
| H | -1.087142 | 4.089651  | -0.512930 |
| H | -5.376000 | 2.086834  | -0.788781 |
| H | -3.434785 | 3.624433  | -0.962010 |
| H | -6.302056 | -0.109733 | -0.175750 |
| H | -5.992148 | -2.414407 | 0.694549  |
| H | -3.698642 | -3.221548 | 1.291972  |
| H | -1.737038 | -1.764778 | 0.950441  |
| H | 0.240772  | -2.820814 | 1.117014  |
| H | 1.218522  | -4.093620 | 0.388351  |
| H | -0.944060 | -3.217720 | -0.878456 |
| H | 0.507405  | -3.536265 | -1.830739 |
| H | 3.522348  | -3.605642 | 0.971494  |
| H | 5.454887  | -2.049471 | 0.943132  |
| H | 1.911006  | 1.771685  | -1.044906 |
| H | 3.875801  | 3.250583  | -1.234211 |
| H | 6.127472  | 2.466854  | -0.470028 |
| H | 6.398278  | 0.162116  | 0.413104  |
| H | -1.111972 | -1.790490 | -3.337842 |
| H | -1.129981 | -0.088205 | -2.835043 |
| H | -2.092687 | -1.293643 | -1.949670 |
| H | -1.424908 | 1.126910  | 2.738240  |
| H | 0.094338  | 1.683614  | 3.477723  |
| H | -0.082163 | -0.017659 | 2.992742  |

TS<sub>6</sub>

|   |           |           |           |
|---|-----------|-----------|-----------|
| C | 0.076198  | 2.157243  | 0.231368  |
| C | -0.579087 | 3.236317  | -0.700213 |
| C | -1.559554 | 2.664933  | -1.736767 |
| C | -2.470701 | 1.683132  | -1.053995 |
| C | -1.853925 | 0.704271  | -0.275030 |
| C | -0.360503 | 0.743097  | -0.174016 |
| C | -2.665206 | -0.195917 | 0.504120  |
| C | -4.098310 | -0.126647 | 0.378726  |
| C | -4.676363 | 0.843093  | -0.485075 |
| C | -3.880878 | 1.738576  | -1.165999 |
| C | -4.910636 | -1.016945 | 1.138465  |
| C | -4.350616 | -1.922528 | 2.013043  |
| C | -2.943523 | -1.967305 | 2.171288  |
| C | -2.127426 | -1.131048 | 1.436416  |
| C | 0.426602  | -0.346235 | -0.483402 |
| H | 1.148302  | 2.239622  | 0.058715  |
| C | 1.869757  | -0.706064 | -0.137824 |
| C | 2.172360  | -2.082944 | -0.280566 |
| C | 1.087970  | -3.135190 | -0.158457 |
| C | -0.163600 | -2.826805 | -0.990260 |
| C | -0.090877 | -1.395822 | -1.524714 |
| C | 3.501348  | -2.537621 | -0.467193 |
| C | 4.561235  | -1.665884 | -0.473143 |
| C | 4.348988  | -0.327394 | -0.057196 |
| C | 3.010032  | 0.131761  | 0.238656  |
| C | -0.225877 | 2.470104  | 1.708267  |
| C | 2.946379  | 1.330556  | 1.008711  |
| C | 4.057089  | 2.105646  | 1.286049  |
| C | 5.333890  | 1.734825  | 0.810178  |

|   |           |           |           |
|---|-----------|-----------|-----------|
| C | 5.469628  | 0.521180  | 0.174713  |
| H | 0.757585  | -1.397444 | -2.232726 |
| C | -1.299598 | -1.095784 | -2.418009 |
| H | -1.122712 | 3.965000  | -0.077658 |
| H | 0.216006  | 3.797393  | -1.216662 |
| H | -0.992301 | 2.157000  | -2.537254 |
| H | -2.131418 | 3.473555  | -2.217833 |
| H | -5.764882 | 0.882372  | -0.581975 |
| H | -4.334609 | 2.499627  | -1.807298 |
| H | -5.996590 | -0.959150 | 1.021648  |
| H | -4.986847 | -2.595467 | 2.593744  |
| H | -2.500736 | -2.666090 | 2.886117  |
| H | -1.047755 | -1.169290 | 1.577820  |
| H | 0.819312  | -3.190220 | 0.911234  |
| H | 1.503374  | -4.122552 | -0.409631 |
| H | -1.079118 | -2.969162 | -0.396051 |
| H | -0.236342 | -3.516214 | -1.847796 |
| H | 3.664855  | -3.603927 | -0.645799 |
| H | 5.574343  | -2.003637 | -0.706163 |
| H | 2.014963  | 1.603024  | 1.484117  |
| H | 3.943212  | 2.999462  | 1.905415  |
| H | 6.204479  | 2.367256  | 1.001238  |
| H | 6.457724  | 0.155996  | -0.119396 |
| H | -1.278493 | -1.811319 | -3.257897 |
| H | -1.262348 | -0.088039 | -2.852648 |
| H | -2.268251 | -1.222779 | -1.918191 |
| H | -1.311184 | 2.474739  | 1.896168  |
| H | 0.163931  | 3.463579  | 1.986823  |
| H | 0.216734  | 1.729049  | 2.393095  |

B3LYP/SVP in methanol

(*P,P*)-*trans*-1

|   |           |           |           |
|---|-----------|-----------|-----------|
| C | -0.075626 | -0.496900 | 1.981049  |
| C | 0.525622  | -1.812150 | 2.584995  |
| C | 1.471446  | -2.559081 | 1.623193  |
| C | 2.440716  | -1.592583 | 0.990751  |
| C | 1.901619  | -0.425169 | 0.445763  |
| C | 0.413671  | -0.322149 | 0.539664  |
| C | 2.772968  | 0.587156  | -0.079455 |
| C | 4.190236  | 0.337242  | -0.114443 |
| C | 4.693122  | -0.889660 | 0.400486  |
| C | 3.840240  | -1.819988 | 0.955761  |
| C | 5.059925  | 1.335098  | -0.642657 |
| C | 4.566960  | 2.541340  | -1.094405 |
| C | 3.175052  | 2.805208  | -1.028351 |
| C | 2.304144  | 1.853670  | -0.536175 |
| C | -0.413603 | -0.321653 | -0.539491 |
| H | -1.168684 | -0.601073 | 1.956369  |
| C | -1.901566 | -0.424900 | -0.445885 |
| C | -2.440437 | -1.591916 | -0.991949 |
| C | -1.470956 | -2.557701 | -1.625147 |
| C | -0.525118 | -1.809778 | -2.586175 |
| C | 0.075875  | -0.494989 | -1.980967 |
| C | -3.839930 | -1.819556 | -0.957332 |
| C | -4.693021 | -0.889804 | -0.401418 |
| C | -4.190390 | 0.336792  | 0.114484  |
| C | -2.773152 | 0.586947  | 0.079875  |
| C | 0.263472  | 0.712134  | 2.869087  |
| C | -2.304618 | 1.853267  | 0.537431  |
| C | -3.175749 | 2.804327  | 1.030137  |
| C | -4.567614 | 2.540162  | 1.095888  |
| C | -5.060315 | 1.334139  | 0.643270  |
| H | 1.168946  | -0.599043 | -1.956239 |
| C | -0.263215 | 0.714870  | -2.867880 |
| H | 1.088179  | -1.565080 | 3.500120  |
| H | -0.288878 | -2.487815 | 2.891098  |
| H | 0.871302  | -3.047471 | 0.834089  |
| H | 2.007168  | -3.361206 | 2.154044  |
| H | 5.770682  | -1.074262 | 0.367523  |
| H | 4.238772  | -2.749521 | 1.372957  |
| H | 6.133687  | 1.128368  | -0.673251 |
| H | 5.246187  | 3.299906  | -1.492861 |
| H | 2.790928  | 3.771686  | -1.366241 |
| H | 1.236822  | 2.071018  | -0.479952 |
| H | -2.006502 | -3.359428 | -2.156778 |
| H | -0.870839 | -3.046710 | -0.836406 |
| H | -1.087569 | -1.561978 | -3.501168 |
| H | 0.289518  | -2.485066 | -2.892746 |
| H | -4.238272 | -2.748799 | -1.375354 |
| H | -5.770560 | -1.074582 | -0.368768 |
| H | -1.237340 | 2.070866  | 0.481418  |
| H | -2.791836 | 3.770658  | 1.368685  |
| H | -5.247020 | 3.298346  | 1.494764  |
| H | -6.134046 | 1.127210  | 0.673578  |
| H | 0.112148  | 0.557675  | -3.893105 |
| H | 0.188364  | 1.644195  | -2.488503 |
| H | -1.352687 | 0.871433  | -2.936023 |
| H | 1.352943  | 0.868683  | 2.937279  |
| H | -0.111783 | 0.553939  | 3.894198  |
| H | -0.188184 | 1.641799  | 2.490654  |

*(P,P)*-trans-1\*

|   |           |           |           |
|---|-----------|-----------|-----------|
| C | -0.178920 | -1.868800 | -1.195823 |
| C | 0.606970  | -2.113148 | -2.502658 |
| C | 2.080073  | -2.377316 | -2.198742 |
| C | 2.664427  | -1.443292 | -1.162822 |
| C | 1.823919  | -0.606521 | -0.342074 |
| C | 0.409435  | -0.597347 | -0.568741 |
| C | 2.478857  | 0.217838  | 0.683380  |
| C | 3.917630  | 0.275064  | 0.746824  |
| C | 4.686956  | -0.507318 | -0.152175 |
| C | 4.058345  | -1.352780 | -1.062062 |
| C | 4.542679  | 1.079934  | 1.740590  |
| C | 3.796661  | 1.768596  | 2.683270  |
| C | 2.393001  | 1.667469  | 2.664328  |
| C | 1.758374  | 0.905254  | 1.684607  |
| C | -0.409442 | 0.597340  | -0.568717 |
| H | -1.225248 | -1.666469 | -1.464760 |
| C | -1.823924 | 0.606517  | -0.342036 |
| C | -2.664431 | 1.443318  | -1.162754 |
| C | -2.080076 | 2.377377  | -2.198643 |
| C | -0.606974 | 2.113220  | -2.502573 |
| C | 0.178922  | 1.868810  | -1.195752 |
| C | -4.058349 | 1.352808  | -1.061994 |
| C | -4.686960 | 0.507323  | -0.152128 |
| C | -3.917633 | -0.275079 | 0.746853  |
| C | -2.478861 | -0.217856 | 0.683408  |
| C | -0.151664 | -3.118579 | -0.294467 |
| C | -1.758377 | -0.905283 | 1.684626  |
| C | -2.393005 | -1.667513 | 2.664336  |
| C | -3.796665 | -1.768642 | 2.683275  |
| C | -4.542683 | -1.079965 | 1.740606  |
| H | 1.225245  | 1.666472  | -1.464705 |
| C | 0.151700  | 3.118551  | -0.294343 |
| H | 0.172034  | -2.965918 | -3.050661 |
| H | 0.505055  | -1.229301 | -3.155065 |
| H | 2.683593  | -2.327962 | -3.120444 |
| H | 2.196818  | -3.414853 | -1.832088 |
| H | 5.778301  | -0.457434 | -0.104614 |
| H | 4.669114  | -1.957919 | -1.739601 |
| H | 5.635411  | 1.129085  | 1.757459  |
| H | 4.294826  | 2.373530  | 3.445896  |
| H | 1.794411  | 2.184496  | 3.418965  |
| H | 0.670852  | 0.832443  | 1.705399  |
| H | -2.196819 | 3.414901  | -1.831951 |
| H | -2.683599 | 2.328059  | -3.120346 |
| H | -0.172038 | 2.966012  | -3.050541 |
| H | -0.505067 | 1.229401  | -3.155019 |
| H | -4.669118 | 1.957970  | -1.739511 |
| H | -5.778304 | 0.457442  | -0.104563 |
| H | -0.670856 | -0.832471 | 1.705421  |
| H | -1.794415 | -2.184551 | 3.418965  |
| H | -4.294829 | -2.373589 | 3.445890  |
| H | -5.635414 | -1.129115 | 1.757474  |
| H | 0.846690  | 3.019853  | 0.550114  |
| H | -0.848199 | 3.318182  | 0.120495  |
| H | 0.456998  | 4.006389  | -0.874005 |
| H | 0.848238  | -3.318192 | 0.120372  |
| H | -0.456926 | -4.006403 | -0.874169 |
| H | -0.846666 | -3.019941 | 0.549987  |

*(M,M)*-cis-2

|   |           |          |          |
|---|-----------|----------|----------|
| C | -1.459985 | 2.806019 | 0.281672 |
| C | -2.981092 | 2.627090 | 0.153125 |



|   |           |           |           |
|---|-----------|-----------|-----------|
| C | -3.434242 | 1.344820  | 0.854851  |
| C | -2.793282 | 0.168586  | 0.166299  |
| C | -1.498381 | 0.298458  | -0.364872 |
| C | -0.686704 | 1.500074  | -0.039762 |
| C | -1.050148 | -0.724224 | -1.299302 |
| C | -1.806590 | -1.941739 | -1.432937 |
| C | -3.033441 | -2.084533 | -0.729067 |
| C | -3.532667 | -1.029531 | -0.001555 |
| C | -1.355568 | -2.966724 | -2.314240 |
| C | -0.237998 | -2.789200 | -3.101219 |
| C | 0.456682  | -1.556763 | -3.049360 |
| C | 0.064259  | -0.562705 | -2.173353 |
| C | 0.696615  | 1.495617  | 0.039784  |
| H | -1.155434 | 3.591778  | -0.425392 |
| C | 1.500514  | 0.288822  | 0.365056  |
| C | 2.794680  | 0.150643  | -0.165804 |
| C | 3.443203  | 1.322677  | -0.854442 |
| C | 2.998185  | 2.607936  | -0.152959 |
| C | 1.478260  | 2.796582  | -0.281597 |
| C | 3.526348  | -1.052174 | 0.002223  |
| C | 3.020222  | -2.103961 | 0.729622  |
| C | 1.794057  | -1.953378 | 1.433073  |
| C | 1.045388  | -0.731092 | 1.299168  |
| C | -1.143158 | 3.323224  | 1.704670  |
| C | -0.068500 | -0.562650 | 2.172566  |
| C | -0.467613 | -1.554244 | 3.048341  |
| C | 0.219318  | -2.790997 | 3.100548  |
| C | 1.336136  | -2.975530 | 2.314116  |
| H | 1.178738  | 3.584252  | 0.425482  |
| C | 1.164807  | 3.315814  | -1.704595 |
| H | -3.487524 | 3.506814  | 0.582245  |
| H | -3.276057 | 2.574879  | -0.908912 |
| H | -4.529689 | 1.236121  | 0.819788  |
| H | -3.166472 | 1.381545  | 1.926255  |
| H | -3.596436 | -3.017148 | -0.824395 |
| H | -4.516854 | -1.105541 | 0.470267  |
| H | -1.935899 | -3.892169 | -2.373255 |
| H | 0.092560  | -3.577940 | -3.782511 |
| H | 1.306129  | -1.383496 | -3.715912 |
| H | 0.602746  | 0.382192  | -2.174266 |
| H | 3.175757  | 1.360941  | -1.925875 |
| H | 4.537935  | 1.207019  | -0.819274 |
| H | 3.510253  | 3.484349  | -0.582173 |
| H | 3.292728  | 2.554004  | 0.909106  |
| H | 4.510125  | -1.134469 | -0.469397 |
| H | 3.577214  | -3.040161 | 0.825077  |
| H | -0.601052 | 0.385602  | 2.173195  |
| H | -1.316316 | -1.375674 | 3.714438  |
| H | -0.116540 | -3.577668 | 3.781638  |
| H | 1.910546  | -3.904644 | 2.373368  |
| H | 0.088709  | 3.400814  | -1.904927 |
| H | 1.583373  | 2.653566  | -2.478719 |
| H | 1.610368  | 4.314148  | -1.849852 |
| H | -1.566145 | 2.663793  | 2.478795  |
| H | -1.582078 | 4.324504  | 1.849877  |
| H | -0.066526 | 3.401084  | 1.905039  |

TS<sub>2</sub>

|   |          |           |           |
|---|----------|-----------|-----------|
| C | 1.939657 | -2.012688 | 1.042855  |
| C | 3.162687 | -2.415720 | 0.225527  |
| C | 4.021810 | -1.185014 | 0.011315  |
| C | 3.244172 | 0.114324  | -0.104324 |
| C | 1.833651 | 0.246764  | -0.091476 |

|   |           |           |           |
|---|-----------|-----------|-----------|
| C | 1.055358  | -1.029803 | 0.255498  |
| C | 1.331589  | 1.598729  | -0.387461 |
| C | 2.235958  | 2.726272  | -0.417150 |
| C | 3.633806  | 2.519046  | -0.302350 |
| C | 4.107468  | 1.242021  | -0.211765 |
| C | 1.754116  | 4.049549  | -0.622594 |
| C | 0.422340  | 4.301416  | -0.869867 |
| C | -0.461817 | 3.205531  | -0.944910 |
| C | -0.015002 | 1.916746  | -0.711181 |
| C | -0.225055 | -1.469512 | -0.005353 |
| H | 1.356597  | -2.904362 | 1.237745  |
| C | -1.465889 | -0.709265 | -0.377950 |
| C | -2.024993 | -0.981375 | -1.624897 |
| C | -1.252806 | -1.935997 | -2.495425 |
| C | -0.872080 | -3.197848 | -1.682471 |
| C | -0.724933 | -2.955528 | -0.145923 |
| C | -3.274682 | -0.422241 | -1.993168 |
| C | -3.983505 | 0.359950  | -1.106448 |
| C | -3.488267 | 0.595702  | 0.207238  |
| C | -2.215561 | 0.045238  | 0.591536  |
| C | 2.293575  | -1.471998 | 2.443914  |
| C | -1.754414 | 0.281831  | 1.918703  |
| C | -2.502553 | 1.019785  | 2.814938  |
| C | -3.751112 | 1.569747  | 2.430254  |
| C | -4.229713 | 1.360418  | 1.153484  |
| H | -1.746876 | -2.936090 | 0.264265  |
| C | -0.096610 | -4.209990 | 0.476980  |
| H | 3.738098  | -3.209886 | 0.730907  |
| H | 2.826379  | -2.831561 | -0.738831 |
| H | 4.652514  | -1.285642 | -0.889444 |
| H | 4.735117  | -1.071129 | 0.846133  |
| H | 4.310780  | 3.377053  | -0.330389 |
| H | 5.186073  | 1.061865  | -0.187567 |
| H | 2.481769  | 4.866008  | -0.605874 |
| H | 0.064528  | 5.321055  | -1.035709 |
| H | -1.512406 | 3.367231  | -1.201045 |
| H | -0.725641 | 1.115401  | -0.827839 |
| H | -0.330539 | -1.439538 | -2.843229 |
| H | -1.824110 | -2.206596 | -3.396067 |
| H | 0.075133  | -3.608993 | -2.069356 |
| H | -1.639455 | -3.976430 | -1.825339 |
| H | -3.677531 | -0.627688 | -2.989229 |
| H | -4.947186 | 0.790888  | -1.392339 |
| H | -0.792040 | -0.130124 | 2.225585  |
| H | -2.129377 | 1.182899  | 3.829807  |
| H | -4.331831 | 2.156118  | 3.147510  |
| H | -5.193703 | 1.776738  | 0.846905  |
| H | -0.064311 | -4.172283 | 1.576358  |
| H | 0.908646  | -4.442457 | 0.096687  |
| H | -0.740572 | -5.066038 | 0.211096  |
| H | 2.865627  | -0.532233 | 2.430703  |
| H | 2.892561  | -2.219550 | 2.992145  |
| H | 1.378575  | -1.291204 | 3.031247  |

(*M,P*)-*cis*-2

|   |           |           |           |
|---|-----------|-----------|-----------|
| C | 2.444968  | -1.719345 | -0.797543 |
| C | 2.847064  | -2.494554 | 0.502173  |
| C | 2.178020  | -1.949090 | 1.779316  |
| C | 0.685377  | -1.959063 | 1.563127  |
| C | 0.226103  | -1.467586 | 0.338979  |
| C | 1.272101  | -0.777321 | -0.488149 |
| C | -1.115786 | -1.763997 | -0.075463 |
| C | -2.023195 | -2.360266 | 0.870733  |

|   |           |           |           |
|---|-----------|-----------|-----------|
| C | -1.549904 | -2.701855 | 2.167293  |
| C | -0.216839 | -2.549786 | 2.484527  |
| C | -3.357533 | -2.655565 | 0.466160  |
| C | -3.768626 | -2.446023 | -0.833472 |
| C | -2.853013 | -1.937758 | -1.789640 |
| C | -1.568180 | -1.598026 | -1.417145 |
| C | 1.321031  | 0.570527  | -0.672657 |
| H | 3.305021  | -1.106107 | -1.077793 |
| C | 0.477731  | 1.560769  | 0.090730  |
| C | 1.201082  | 2.246246  | 1.074250  |
| C | 2.684526  | 1.975832  | 1.191559  |
| C | 3.391092  | 1.894565  | -0.187953 |
| C | 2.450544  | 1.397259  | -1.322007 |
| C | 0.551235  | 3.188404  | 1.913652  |
| C | -0.784301 | 3.484547  | 1.749012  |
| C | -1.515855 | 2.916336  | 0.671180  |
| C | -0.866417 | 1.968231  | -0.198098 |
| C | 2.159523  | -2.685996 | -1.955852 |
| C | -1.566934 | 1.551479  | -1.366193 |
| C | -2.850728 | 1.984958  | -1.629227 |
| C | -3.515659 | 2.853659  | -0.727163 |
| C | -2.856567 | 3.311830  | 0.394306  |
| H | 1.922101  | 2.291032  | -1.693276 |
| C | 3.210053  | 0.870214  | -2.546251 |
| H | 2.562690  | -3.555247 | 0.399923  |
| H | 3.943520  | -2.473352 | 0.611889  |
| H | 2.545518  | -0.930738 | 1.987841  |
| H | 2.446083  | -2.566340 | 2.650762  |
| H | -2.247332 | -3.140502 | 2.886633  |
| H | 0.159901  | -2.889191 | 3.454020  |
| H | -4.043750 | -3.082608 | 1.203365  |
| H | -4.790067 | -2.693358 | -1.135382 |
| H | -3.168222 | -1.815865 | -2.829654 |
| H | -0.868257 | -1.222989 | -2.164688 |
| H | 2.830227  | 1.017706  | 1.716411  |
| H | 3.158171  | 2.741938  | 1.824093  |
| H | 4.256857  | 1.216827  | -0.103755 |
| H | 3.791746  | 2.883253  | -0.466501 |
| H | 1.128873  | 3.680594  | 2.701758  |
| H | -1.282945 | 4.197593  | 2.411686  |
| H | -1.055976 | 0.904694  | -2.077295 |
| H | -3.358922 | 1.658390  | -2.540663 |
| H | -4.539564 | 3.175510  | -0.935954 |
| H | -3.345569 | 4.011411  | 1.078559  |
| H | 2.522446  | 0.442594  | -3.293507 |
| H | 3.973802  | 0.115358  | -2.311856 |
| H | 3.735194  | 1.710749  | -3.030771 |
| H | 1.276582  | -3.313926 | -1.749728 |
| H | 3.016160  | -3.362494 | -2.117311 |
| H | 1.980242  | -2.146699 | -2.899905 |

TS<sub>3</sub>

|   |          |           |           |
|---|----------|-----------|-----------|
| C | 0.800917 | -2.847466 | -0.394297 |
| C | 1.108226 | -2.957401 | -1.923212 |
| C | 1.534873 | -1.628803 | -2.594575 |
| C | 2.145122 | -0.676283 | -1.602892 |
| C | 1.462441 | -0.500545 | -0.397949 |
| C | 0.311945 | -1.406187 | -0.124376 |
| C | 2.016661 | 0.360168  | 0.617453  |
| C | 3.233484 | 1.074082  | 0.333988  |
| C | 3.869678 | 0.898097  | -0.926615 |
| C | 3.342027 | 0.036501  | -1.864271 |
| C | 3.780879 | 1.941405  | 1.322916  |

|   |           |           |           |
|---|-----------|-----------|-----------|
| C | 3.168982  | 2.098873  | 2.548888  |
| C | 1.978640  | 1.386145  | 2.837786  |
| C | 1.419395  | 0.542451  | 1.898005  |
| C | -0.991149 | -1.152458 | 0.251441  |
| H | -0.016453 | -3.545951 | -0.208542 |
| C | -1.923303 | 0.020788  | -0.031208 |
| C | -3.308211 | -0.269511 | 0.048169  |
| C | -3.915710 | -1.663538 | 0.106220  |
| C | -2.910493 | -2.791353 | 0.297843  |
| C | -1.752328 | -2.205891 | 1.104722  |
| C | -4.287207 | 0.763022  | 0.060129  |
| C | -3.952103 | 2.085815  | -0.025612 |
| C | -2.603474 | 2.438297  | -0.289403 |
| C | -1.593494 | 1.409148  | -0.382345 |
| C | 2.015459  | -3.296600 | 0.438136  |
| C | -0.340771 | 1.846826  | -0.893524 |
| C | -0.058904 | 3.171737  | -1.176833 |
| C | -1.024240 | 4.177996  | -0.962190 |
| C | -2.280904 | 3.801913  | -0.539717 |
| H | -2.221491 | -1.566501 | 1.874983  |
| C | -1.003363 | -3.243510 | 1.952998  |
| H | 1.905226  | -3.706941 | -2.055735 |
| H | 0.219687  | -3.346945 | -2.443402 |
| H | 0.639966  | -1.148162 | -3.028601 |
| H | 2.222604  | -1.814837 | -3.433319 |
| H | 4.790645  | 1.449690  | -1.135312 |
| H | 3.845721  | -0.104099 | -2.825154 |
| H | 4.703221  | 2.481580  | 1.089976  |
| H | 3.600129  | 2.767207  | 3.299197  |
| H | 1.499702  | 1.504767  | 3.813723  |
| H | 0.502534  | 0.002395  | 2.136125  |
| H | -4.522648 | -1.804000 | -0.806029 |
| H | -4.638696 | -1.678491 | 0.940540  |
| H | -2.539066 | -3.180343 | -0.665444 |
| H | -3.382714 | -3.637477 | 0.823716  |
| H | -5.336029 | 0.472606  | 0.171389  |
| H | -4.710140 | 2.870473  | 0.044993  |
| H | 0.419929  | 1.115362  | -1.120481 |
| H | 0.922987  | 3.432745  | -1.581106 |
| H | -0.790934 | 5.226700  | -1.164845 |
| H | -3.074331 | 4.545586  | -0.421605 |
| H | -0.110056 | -2.819823 | 2.435047  |
| H | -0.704926 | -4.153600 | 1.414817  |
| H | -1.681397 | -3.568665 | 2.759955  |
| H | 2.932056  | -2.753327 | 0.160156  |
| H | 2.209260  | -4.369266 | 0.269517  |
| H | 1.856762  | -3.152998 | 1.517405  |

(*P,P*)-*cis*-2

|   |          |           |           |
|---|----------|-----------|-----------|
| C | 1.494267 | 2.812890  | 0.103520  |
| C | 2.729463 | 2.656565  | 1.036723  |
| C | 2.645838 | 1.407868  | 1.925971  |
| C | 2.487853 | 0.204033  | 1.032777  |
| C | 1.535145 | 0.281450  | 0.012392  |
| C | 0.682876 | 1.507920  | 0.007053  |
| C | 1.471943 | -0.765122 | -0.973797 |
| C | 2.300612 | -1.930861 | -0.811321 |
| C | 3.196707 | -2.000914 | 0.290569  |
| C | 3.306062 | -0.945740 | 1.170020  |
| C | 2.233855 | -2.977515 | -1.776328 |
| C | 1.417481 | -2.873765 | -2.882532 |
| C | 0.639863 | -1.703977 | -3.075297 |
| C | 0.665326 | -0.683195 | -2.146062 |

|   |           |           |           |
|---|-----------|-----------|-----------|
| C | -0.682010 | 1.508308  | -0.007020 |
| H | 0.848968  | 3.577709  | 0.554261  |
| C | -1.534967 | 0.282318  | -0.012373 |
| C | -2.487666 | 0.205425  | -1.032805 |
| C | -2.644973 | 1.409354  | -1.926000 |
| C | -2.727937 | 2.658078  | -1.036731 |
| C | -1.492642 | 2.813740  | -0.103561 |
| C | -3.306508 | -0.943895 | -1.170078 |
| C | -3.197775 | -1.999130 | -0.290625 |
| C | -2.301705 | -1.929565 | 0.811317  |
| C | -1.472404 | -0.764280 | 0.973830  |
| C | 1.919463  | 3.320804  | -1.284596 |
| C | -0.665825 | -0.682774 | 2.146150  |
| C | -0.640990 | -1.703554 | 3.075405  |
| C | -1.419216 | -2.872929 | 2.882591  |
| C | -2.235571 | -2.976250 | 1.776332  |
| H | -0.846887 | 3.578132  | -0.554377 |
| C | -1.917533 | 3.321994  | 1.284521  |
| H | 3.647448  | 2.578686  | 0.429885  |
| H | 2.838068  | 3.562879  | 1.654381  |
| H | 1.786989  | 1.499330  | 2.616527  |
| H | 3.546320  | 1.310172  | 2.551771  |
| H | 3.819477  | -2.892015 | 0.410098  |
| H | 4.027946  | -0.987739 | 1.991051  |
| H | 2.858909  | -3.862992 | -1.628289 |
| H | 1.380842  | -3.680348 | -3.619899 |
| H | 0.019107  | -1.607632 | -3.970412 |
| H | 0.077781  | 0.217860  | -2.317910 |
| H | -3.545501 | 1.312150  | -2.551811 |
| H | -1.786069 | 1.500357  | -2.616549 |
| H | -3.645948 | 2.580655  | -0.429873 |
| H | -2.836086 | 3.564469  | -1.654355 |
| H | -4.028375 | -0.985499 | -1.991145 |
| H | -3.821025 | -2.889889 | -0.410193 |
| H | -0.077792 | 0.217959  | 2.318022  |
| H | -0.020247 | -1.607534 | 3.970564  |
| H | -1.383061 | -3.679525 | 3.619968  |
| H | -2.861088 | -3.861394 | 1.628255  |
| H | -1.048258 | 3.529361  | 1.928962  |
| H | -2.551104 | 2.582323  | 1.802155  |
| H | -2.499246 | 4.255489  | 1.195944  |
| H | 2.552702  | 2.580786  | -1.802139 |
| H | 2.501618  | 4.254030  | -1.196078 |
| H | 1.050312  | 3.528536  | -1.929085 |

(*P,P*)-*cis*-2\*

|   |           |           |           |
|---|-----------|-----------|-----------|
| C | 2.355680  | 2.229314  | -0.007728 |
| C | 1.807743  | 3.588578  | -0.518323 |
| C | 0.483433  | 3.439345  | -1.257662 |
| C | -0.504015 | 2.721441  | -0.382038 |
| C | -0.051321 | 1.554488  | 0.321183  |
| C | 1.293467  | 1.120200  | 0.054024  |
| C | -1.018862 | 0.843127  | 1.160319  |
| C | -2.410581 | 1.212929  | 1.102139  |
| C | -2.807399 | 2.316838  | 0.307777  |
| C | -1.855252 | 3.071268  | -0.382813 |
| C | -3.359044 | 0.482295  | 1.875782  |
| C | -2.959201 | -0.532088 | 2.728271  |
| C | -1.588535 | -0.837827 | 2.851369  |
| C | -0.645031 | -0.152613 | 2.089575  |
| C | 1.692879  | -0.252282 | -0.129488 |
| H | 3.154367  | 1.906230  | -0.692483 |
| C | 0.806823  | -1.340899 | -0.433375 |

|   |           |           |           |
|---|-----------|-----------|-----------|
| C | 1.126515  | -2.661675 | 0.076092  |
| C | 2.514135  | -3.009253 | 0.553626  |
| C | 3.309930  | -1.793502 | 1.014522  |
| C | 3.170383  | -0.629876 | 0.019174  |
| C | 0.117200  | -3.617439 | 0.192820  |
| C | -1.187399 | -3.391031 | -0.261021 |
| C | -1.490301 | -2.217058 | -0.991066 |
| C | -0.474261 | -1.206242 | -1.149140 |
| C | 2.986049  | 2.457270  | 1.388136  |
| C | -0.731827 | -0.168948 | -2.068604 |
| C | -1.962419 | -0.044059 | -2.717171 |
| C | -2.989914 | -0.974446 | -2.474548 |
| C | -2.752852 | -2.046939 | -1.629476 |
| H | 3.722469  | 0.213134  | 0.443811  |
| C | 3.812619  | -0.935970 | -1.348102 |
| H | 1.646565  | 4.267146  | 0.335847  |
| H | 2.563809  | 4.068135  | -1.160717 |
| H | 0.640533  | 2.855581  | -2.186258 |
| H | 0.084741  | 4.418490  | -1.566094 |
| H | -3.864973 | 2.592029  | 0.268413  |
| H | -2.177672 | 3.927700  | -0.982571 |
| H | -4.415343 | 0.755775  | 1.798277  |
| H | -3.699046 | -1.079760 | 3.318490  |
| H | -1.260539 | -1.607412 | 3.555168  |
| H | 0.411440  | -0.391052 | 2.215864  |
| H | 3.051613  | -3.495879 | -0.283510 |
| H | 2.458665  | -3.770539 | 1.348535  |
| H | 4.373435  | -2.056688 | 1.141336  |
| H | 2.945030  | -1.460161 | 2.001821  |
| H | 0.355705  | -4.570707 | 0.674485  |
| H | -1.958814 | -4.154818 | -0.128824 |
| H | 0.054446  | 0.554418  | -2.287212 |
| H | -2.121737 | 0.779307  | -3.418401 |
| H | -3.959702 | -0.864224 | -2.967715 |
| H | -3.524954 | -2.804244 | -1.465233 |
| H | 3.764640  | -0.058121 | -2.012792 |
| H | 3.313916  | -1.767159 | -1.870793 |
| H | 4.876567  | -1.201364 | -1.222948 |
| H | 2.219020  | 2.804594  | 2.099395  |
| H | 3.766263  | 3.235311  | 1.324834  |
| H | 3.447711  | 1.554599  | 1.813742  |

(*M,M*)-*trans*-1

|   |           |           |           |
|---|-----------|-----------|-----------|
| C | 0.290992  | -1.966599 | -0.860099 |
| C | -0.773128 | -3.043987 | -1.163042 |
| C | -1.921712 | -2.468614 | -1.997351 |
| C | -2.623529 | -1.454202 | -1.136909 |
| C | -1.841304 | -0.607032 | -0.338763 |
| C | -0.362038 | -0.588202 | -0.539218 |
| C | -2.505714 | 0.163944  | 0.694693  |
| C | -3.945275 | 0.190420  | 0.740371  |
| C | -4.689085 | -0.588034 | -0.186987 |
| C | -4.037923 | -1.419868 | -1.069814 |
| C | -4.610217 | 0.962471  | 1.737069  |
| C | -3.900139 | 1.652810  | 2.695405  |
| C | -2.485613 | 1.581701  | 2.698211  |
| C | -1.813994 | 0.865123  | 1.726518  |
| C | 0.362034  | 0.587682  | -0.539745 |
| H | 0.857797  | -2.313544 | 0.018223  |
| C | 1.841323  | 0.606700  | -0.339326 |
| C | 2.623513  | 1.453181  | -1.138235 |
| C | 1.921625  | 2.466787  | -1.999570 |
| C | 0.773109  | 3.042916  | -1.165704 |

|   |           |           |           |
|---|-----------|-----------|-----------|
| C | -0.291014 | 1.965808  | -0.861715 |
| C | 4.037907  | 1.418944  | -1.071126 |
| C | 4.689093  | 0.587924  | -0.187548 |
| C | 3.945313  | -0.189727 | 0.740508  |
| C | 2.505750  | -0.163336 | 0.694810  |
| C | 1.269784  | -1.911468 | -2.049703 |
| C | 1.814051  | -0.863648 | 1.727242  |
| C | 2.485698  | -1.579332 | 2.699573  |
| C | 3.900230  | -1.650362 | 2.696854  |
| C | 4.610284  | -0.960854 | 1.737903  |
| H | -0.857703 | 2.313523  | 0.016381  |
| C | -1.269944 | 1.909682  | -2.051155 |
| H | -0.289372 | -3.885015 | -1.684767 |
| H | -1.193150 | -3.452228 | -0.228333 |
| H | -2.628594 | -3.253722 | -2.307438 |
| H | -1.526706 | -2.014888 | -2.924544 |
| H | -5.781610 | -0.551649 | -0.155831 |
| H | -4.611848 | -2.069303 | -1.737396 |
| H | -5.703997 | 0.979715  | 1.735663  |
| H | -4.421153 | 2.234456  | 3.460654  |
| H | -1.918360 | 2.093850  | 3.480318  |
| H | -0.726464 | 0.820251  | 1.762007  |
| H | 1.526544  | 2.012187  | -2.926302 |
| H | 2.628461  | 3.251626  | -2.310444 |
| H | 0.289326  | 3.883479  | -1.688149 |
| H | 1.193195  | 3.451993  | -0.231390 |
| H | 4.611813  | 2.067791  | -1.739296 |
| H | 5.781619  | 0.551603  | -0.156362 |
| H | 0.726516  | -0.818819 | 1.762679  |
| H | 1.918463  | -2.090827 | 3.482120  |
| H | 4.421265  | -2.231293 | 3.462631  |
| H | 5.704064  | -0.978047 | 1.736521  |
| H | -0.754220 | 1.615504  | -2.980494 |
| H | -1.712418 | 2.905870  | -2.215745 |
| H | -2.098262 | 1.207886  | -1.898814 |
| H | 0.753976  | -1.618034 | -2.979231 |
| H | 1.712225  | -2.907797 | -2.213530 |
| H | 2.098115  | -1.209550 | -1.898017 |

TS<sub>5</sub>

|   |           |           |           |
|---|-----------|-----------|-----------|
| C | -0.343627 | -0.874581 | 1.592532  |
| C | -0.339603 | -2.413514 | 1.508646  |
| C | 0.536632  | -2.888222 | 0.356767  |
| C | 1.774524  | -2.040653 | 0.188680  |
| C | 1.714118  | -0.623735 | 0.115682  |
| C | 0.304086  | -0.095761 | 0.410470  |
| C | 2.980483  | 0.045841  | -0.217706 |
| C | 4.204030  | -0.727261 | -0.316722 |
| C | 4.182661  | -2.132711 | -0.154949 |
| C | 2.987833  | -2.762587 | 0.062852  |
| C | 5.452962  | -0.101955 | -0.601787 |
| C | 5.550169  | 1.251738  | -0.825916 |
| C | 4.368357  | 2.020776  | -0.775810 |
| C | 3.150853  | 1.435754  | -0.483496 |
| C | -0.464816 | 0.961677  | -0.077717 |
| H | -1.379715 | -0.535787 | 1.680978  |
| C | -1.961332 | 0.864961  | -0.070977 |
| C | -2.762280 | 1.986721  | 0.206249  |
| C | -2.169293 | 3.369220  | 0.138594  |
| C | -1.021675 | 3.344758  | -0.870768 |
| C | 0.076236  | 2.364060  | -0.425022 |
| C | -4.156168 | 1.843456  | 0.434942  |
| C | -4.790184 | 0.631030  | 0.300290  |

|   |           |           |           |
|---|-----------|-----------|-----------|
| C | -4.074344 | -0.476206 | -0.232284 |
| C | -2.661691 | -0.346856 | -0.477312 |
| C | 0.355321  | -0.394473 | 2.885325  |
| C | -2.043907 | -1.381815 | -1.234107 |
| C | -2.739331 | -2.505118 | -1.642359 |
| C | -4.098797 | -2.676657 | -1.289524 |
| C | -4.751332 | -1.672740 | -0.604577 |
| H | 0.789747  | 2.288076  | -1.258048 |
| C | 0.767787  | 2.974260  | 0.822841  |
| H | 0.037761  | -2.835931 | 2.454515  |
| H | -1.363592 | -2.798816 | 1.382485  |
| H | -0.038063 | -2.848817 | -0.580284 |
| H | 0.824977  | -3.941301 | 0.490295  |
| H | 5.116192  | -2.696698 | -0.229127 |
| H | 2.952049  | -3.851693 | 0.148944  |
| H | 6.340453  | -0.739241 | -0.650479 |
| H | 6.512961  | 1.718756  | -1.049282 |
| H | 4.404976  | 3.095656  | -0.974056 |
| H | 2.296317  | 2.084142  | -0.480476 |
| H | -1.821626 | 3.725029  | 1.123890  |
| H | -2.954284 | 4.076624  | -0.173555 |
| H | -0.577772 | 4.347002  | -0.984925 |
| H | -1.418446 | 3.054186  | -1.858309 |
| H | -4.726696 | 2.731170  | 0.724668  |
| H | -5.857643 | 0.527451  | 0.513715  |
| H | -1.004502 | -1.260065 | -1.533329 |
| H | -2.234707 | -3.263955 | -2.246684 |
| H | -4.634516 | -3.581158 | -1.590290 |
| H | -5.816274 | -1.761031 | -0.370610 |
| H | 0.024311  | 3.231585  | 1.591330  |
| H | 1.303911  | 3.901530  | 0.559275  |
| H | 1.478956  | 2.289474  | 1.298922  |
| H | 1.414267  | -0.698276 | 2.919491  |
| H | -0.146612 | -0.835203 | 3.763416  |
| H | 0.311552  | 0.700836  | 2.990508  |

(*M,P*)-*trans*-1

|   |           |           |           |
|---|-----------|-----------|-----------|
| C | 0.237843  | 1.365650  | 1.325832  |
| C | -0.019071 | 2.863220  | 0.951376  |
| C | -0.777816 | 3.037913  | -0.381733 |
| C | -1.972682 | 2.119338  | -0.398489 |
| C | -1.746233 | 0.785063  | -0.053221 |
| C | -0.313960 | 0.445414  | 0.226091  |
| C | -2.864432 | -0.090304 | 0.159321  |
| C | -4.191116 | 0.390132  | -0.126096 |
| C | -4.366891 | 1.730430  | -0.567961 |
| C | -3.285917 | 2.579288  | -0.673116 |
| C | -5.304359 | -0.478690 | 0.067909  |
| C | -5.133344 | -1.755913 | 0.558576  |
| C | -3.832409 | -2.217146 | 0.884980  |
| C | -2.731557 | -1.408060 | 0.687196  |
| C | 0.456291  | -0.457776 | -0.435453 |
| H | 1.319615  | 1.210550  | 1.398836  |
| C | 1.874165  | -0.783167 | -0.047908 |
| C | 2.090149  | -2.117778 | 0.303656  |
| C | 0.903516  | -3.049904 | 0.251891  |
| C | 0.097220  | -2.879339 | -1.058056 |
| C | 0.086685  | -1.411621 | -1.584558 |
| C | 3.386757  | -2.563633 | 0.668879  |
| C | 4.462418  | -1.702435 | 0.651404  |
| C | 4.302855  | -0.359285 | 0.212601  |
| C | 2.995535  | 0.106371  | -0.170824 |
| C | -0.352254 | 1.014712  | 2.702600  |



|   |           |           |           |
|---|-----------|-----------|-----------|
| C | 2.887191  | 1.427330  | -0.698413 |
| C | 3.989408  | 2.251544  | -0.804485 |
| C | 5.266930  | 1.804084  | -0.381303 |
| C | 5.416132  | 0.524980  | 0.111468  |
| H | 0.956299  | -1.326815 | -2.259712 |
| C | -1.129188 | -1.117913 | -2.465392 |
| H | -0.608687 | 3.344079  | 1.749144  |
| H | 0.938719  | 3.404543  | 0.901314  |
| H | -0.103244 | 2.796297  | -1.222034 |
| H | -1.087191 | 4.085839  | -0.516115 |
| H | -5.376883 | 2.085452  | -0.791647 |
| H | -3.433090 | 3.622106  | -0.969233 |
| H | -6.304950 | -0.104774 | -0.168132 |
| H | -5.996889 | -2.409225 | 0.710047  |
| H | -3.702080 | -3.221020 | 1.298750  |
| H | -1.738054 | -1.773018 | 0.946837  |
| H | 0.241514  | -2.826391 | 1.107023  |
| H | 1.225848  | -4.094837 | 0.376842  |
| H | -0.936874 | -3.217847 | -0.887254 |
| H | 0.516049  | -3.532079 | -1.841353 |
| H | 3.524311  | -3.607157 | 0.967076  |
| H | 5.457222  | -2.048579 | 0.945837  |
| H | 1.913111  | 1.781199  | -1.037184 |
| H | 3.878430  | 3.256465  | -1.221300 |
| H | 6.130704  | 2.469814  | -0.459907 |
| H | 6.400359  | 0.161751  | 0.421443  |
| H | -1.100883 | -1.781507 | -3.346599 |
| H | -1.121820 | -0.081441 | -2.837521 |
| H | -2.086139 | -1.293697 | -1.958279 |
| H | -1.447968 | 1.133313  | 2.724995  |
| H | 0.068508  | 1.675792  | 3.479113  |
| H | -0.117147 | -0.023838 | 2.988386  |

TS<sub>6</sub>

|   |           |           |           |
|---|-----------|-----------|-----------|
| C | 0.079604  | 2.154324  | 0.228804  |
| C | -0.572216 | 3.232171  | -0.706147 |
| C | -1.549661 | 2.660887  | -1.745586 |
| C | -2.463232 | 1.680939  | -1.064499 |
| C | -1.850725 | 0.704329  | -0.278714 |
| C | -0.357828 | 0.740156  | -0.174238 |
| C | -2.665332 | -0.190450 | 0.503002  |
| C | -4.098362 | -0.120945 | 0.371067  |
| C | -4.673099 | 0.843598  | -0.501792 |
| C | -3.873487 | 1.736032  | -1.183485 |
| C | -4.916000 | -1.005295 | 1.133316  |
| C | -4.359791 | -1.905379 | 2.017199  |
| C | -2.952544 | -1.950680 | 2.181472  |
| C | -2.131698 | -1.120534 | 1.443633  |
| C | 0.425441  | -0.353512 | -0.478560 |
| H | 1.152508  | 2.236103  | 0.060693  |
| C | 1.868748  | -0.711219 | -0.134474 |
| C | 2.177287  | -2.086986 | -0.281157 |
| C | 1.101055  | -3.146773 | -0.157148 |
| C | -0.165307 | -2.836039 | -0.965390 |
| C | -0.094869 | -1.409768 | -1.511040 |
| C | 3.508820  | -2.534437 | -0.475072 |
| C | 4.565178  | -1.657187 | -0.483017 |
| C | 4.347249  | -0.320862 | -0.060795 |
| C | 3.006678  | 0.130111  | 0.243277  |
| C | -0.225916 | 2.468825  | 1.704196  |
| C | 2.939291  | 1.324550  | 1.020770  |
| C | 4.047404  | 2.105838  | 1.294437  |
| C | 5.324472  | 1.744573  | 0.809185  |

|   |           |           |           |
|---|-----------|-----------|-----------|
| C | 5.465231  | 0.533096  | 0.168781  |
| H | 0.750235  | -1.418199 | -2.223357 |
| C | -1.304430 | -1.114818 | -2.404819 |
| H | -1.116918 | 3.962369  | -0.086172 |
| H | 0.225126  | 3.791386  | -1.221124 |
| H | -0.981099 | 2.151071  | -2.544169 |
| H | -2.120789 | 3.469113  | -2.227813 |
| H | -5.761359 | 0.881565  | -0.604032 |
| H | -4.324107 | 2.494354  | -1.830507 |
| H | -6.001420 | -0.946932 | 1.010235  |
| H | -4.998973 | -2.573571 | 2.600745  |
| H | -2.513666 | -2.646415 | 2.902089  |
| H | -1.052545 | -1.163692 | 1.589905  |
| H | 0.850394  | -3.215895 | 0.916254  |
| H | 1.519494  | -4.127059 | -0.428975 |
| H | -1.069024 | -2.969439 | -0.350977 |
| H | -0.257931 | -3.530669 | -1.816611 |
| H | 3.676625  | -3.599255 | -0.659653 |
| H | 5.579117  | -1.988191 | -0.723025 |
| H | 2.008573  | 1.590239  | 1.502515  |
| H | 3.931674  | 2.997178  | 1.917401  |
| H | 6.191964  | 2.382592  | 0.997649  |
| H | 6.453894  | 0.174446  | -0.132165 |
| H | -1.282603 | -1.836505 | -3.239555 |
| H | -1.266404 | -0.109543 | -2.845959 |
| H | -2.273438 | -1.240102 | -1.904000 |
| H | -1.312319 | 2.483054  | 1.888153  |
| H | 0.170929  | 3.459509  | 1.982473  |
| H | 0.210303  | 1.725210  | 2.390736  |
